# Supplementary material for: Distinct Origin of Claudin7 in Early Tumor Endosomes Affects Exosome Assembly
Source: PubMed Central journal article supplement (PMC6775303; doi:10.7150/ijbs.35347), 2019-08-19
Supplement: ijbsv15p2224s1.pdf [file ijbsv15p2224s1.pdf]

## Supplementary data

### Distinct origin of Claudin7 in early tumor endosomes affects exosome assembly

Daisuke Kyuno<sup>a,b</sup>, Nathalie Bauer<sup>a</sup>, Martina Schnölzer<sup>c</sup>, Jan Provaznik<sup>d</sup>, Eduard Ryschich<sup>a</sup>, Thilo Hackert<sup>a</sup>, Margot Zöller<sup>a</sup>

<sup>a</sup> Department of General, Visceral and Transplantation Surgery, University of Heidelberg, Germany, <sup>b</sup> Department of Surgery, Surgical Oncology and Science, Sapporo Medical University, Sapporo, Japan, <sup>c</sup> Functional Proteome Analysis, DKFZ, Heidelberg, Germany, <sup>d</sup> Gene Core Center, EMBL, Heidelberg, Germany

#### Supplementary Tables

|          |                                                                                         |
|----------|-----------------------------------------------------------------------------------------|
| Table S1 | Distinct recovery of proteins in ASML-wt versus -claudin7kd / -claudin7mP cells and TEX |
| Table S2 | Distinct recovery of proteins in SW948-wt versus -claudin7kd cells and TEX              |
| Table S3 | Claudin7 protein complexes in cells and TEX                                             |
| Table S4 | Claudin7-dependent miRNA recovery in cells and TEX                                      |
| Table S5 | Antibodies and Primers                                                                  |
| Table S6 | Full names of synonyms (alphabetic)                                                     |

#### Supplementary Figures

|           |                                                                                                                                                           |
|-----------|-----------------------------------------------------------------------------------------------------------------------------------------------------------|
| Figure S1 | Functional activities of proteins distinctly recovered in ASML-wt, -cld7kd and -cld7mP cells and TEX                                                      |
| Figure S2 | The impact of cld7 on the protein profile of colorectal cancer cells and TEX and functional activities of proteins distinctly recovered in cells and TEX. |
| Figure S3 | Overview on molecular functions of proteins coimmunoprecipitating with claudin7 in ASML-wt and -cld7mP cells and TEX                                      |
| Figure S4 | Cld7-dependent recruitment of miRNA into colorectal cancer TEX                                                                                            |

#### Supplementary Methods

Exosome preparation  
Mass spectrometry and database searches  
Real time PCR

Table S1

## Distinct recovery of proteins in ASML-wt versus -cld7kd / -cld7mPalm cells and TEX

Table S1A

## Proteins preferentially recovered in ASML-wt cells

| Synonym      | ASML-wt |        | -cldkd |        | -cld7mPalm |        | Protein Description                                  |
|--------------|---------|--------|--------|--------|------------|--------|------------------------------------------------------|
|              | Prot.M  | Pept.M | Prot.M | Pept.M | Prot.M     | Pept.M |                                                      |
| Stmn1        | 95      | 32     | 4      | 3      | 10         | 5      | Stathmin                                             |
| Mob1a        | 91      | 26     |        |        | 1          | 1      | MOB kinase activator 1A                              |
| Atp1b1       | 71      | 18     | 4      | 2      |            |        | Sodium/potassium-transporting ATPase $\beta$ 1       |
| ASCT2        | 134     | 17     | 4      | 2      | 2          | 1      | Alanine/serine/cysteine/threonine transporter 2      |
| Fancd2       | 125     | 17     |        |        | 1          | 1      | Fanconi anemia group D2 protein homolog              |
| Immt         | 38      | 17     |        |        |            |        | MICOS complex subunit Mic60                          |
| Tubb3        | 149     | 17     |        |        |            |        | Tubulin beta-3 chain                                 |
| Smc1a        | 27      | 16     |        |        | 4          | 2      | Structural maintenance of chromosomes 1A             |
| Ppl          | 20      | 14     | 1      | 1      |            |        | Periplakin                                           |
| Itga6        | 19      | 12     | 4      | 2      | 5          | 3      | Integrin, alpha 6                                    |
| Itgb1        | 19      | 12     | 2      | 2      | 7          | 4      | Integrin beta 1                                      |
| Lrp1         | 19      | 12     | 7      | 3      | 8          | 4      | LDL receptor related protein 1                       |
| Trip12       | 19      | 10     | 2      | 1      | 3          | 2      | thyroid hormone receptor interactor 12               |
| Acs14        | 13      | 9      | 4      | 2      |            |        | acyl-CoA synthetase long chain family memb. 4        |
| Far1         | 49      | 9      | 3      | 2      | 3          | 2      | Fatty acyl-CoA reductase 1                           |
| Ppp1cc       | 22      | 9      |        |        |            |        | Serine/threonine-protein phosphatase                 |
| Rab31        | 23      | 9      |        |        |            |        | Ras-related protein Rab-31                           |
| LOC102554637 | 18      | 8      | 4      | 1      | 2          | 1      | anionic trypsin-2-like                               |
| LOC103694878 | 23      | 8      | 3      | 2      |            |        | glutathione S-transferase theta-2-like               |
| Pecr         | 20      | 8      |        |        |            |        | Peroxisomal trans-2-enoyl-CoA reductase              |
| Cbr4         | 13      | 7      |        |        |            |        | Carbonic reductase 4                                 |
| Dazap1       | 22      | 7      |        |        |            |        | DAZ associated protein 1                             |
| Rps6ka3      | 9       | 6      |        |        |            |        | Ribosomal protein S6 kinase                          |
| Hdac1        | 8       | 6      |        |        |            |        | Histone deacetylase 1                                |
| Krt20        | 24      | 6      |        |        |            |        | Keratin, type I cytoskeletal 20                      |
| Pola1        | 9       | 6      |        |        |            |        | DNA polymerase alpha catalytic subunit               |
| Hcfc1        | 8       | 5      |        |        |            |        | host cell factor C1                                  |
| Ogt          | 9       | 5      |        |        |            |        | O-linked N-acetylglucosamine transferase             |
| LOC100359539 | 8       | 5      |        |        |            |        | ribonucleotide reductase M2 polypeptide              |
| LOC100912445 | 7       | 5      |        |        |            |        | leucyl-cystinyl aminopeptidase-like                  |
| Mlec         | 9       | 5      | 1      | 1      |            |        | Malectin                                             |
| Sarnp        | 7       | 5      |        |        | 1          | 1      | SAP domain-containing ribonucleoprotein              |
| Ccs          | 9       | 5      |        |        |            |        | Copper chaperone for superoxide dismutase            |
| Eno2         | 43      | 5      |        |        |            |        | Gamma-enolase                                        |
| Sfn          | 13      | 5      |        |        |            |        | stratifin                                            |
| Usp15        | 12      | 5      |        |        |            |        | Ubiquitin carboxyl-terminal hydrolase                |
| Abcb7        | 7       | 4      | 2      | 1      |            |        | ATP-binding cassette sub-family B member 7           |
| Akr1c12l1    | 6       | 4      |        |        |            |        | Aldo-keto reductase family 1, C12-like 1             |
| Arfip1       | 6       | 4      |        |        | 1          | 1      | ADP-ribosylation factor interacting protein 1        |
| Arid1a       | 4       | 4      |        |        |            |        | AT-rich interaction domain 1A                        |
| Ccdc132      | 5       | 4      | 1      | 1      |            |        | Syndetin                                             |
| Cnpy3        | 6       | 4      |        |        |            |        | canopy FGF signaling regulator 3                     |
| Gnai3        | 5       | 4      |        |        |            |        | Guanine nucleotide binding protein $\alpha$ inhib. 3 |
| Hibadh       | 6       | 4      |        |        |            |        | 3-hydroxyisobutyrate dehydrogenase                   |
| Ldhb         | 33      | 4      |        |        |            |        | L-lactate dehydrogenase B chain                      |
| Gls          | 7       | 4      |        |        |            |        | Glutaminase kidney isoform                           |
| Ltn1         | 5       | 4      | 2      | 1      |            |        | listerin E3 ubiquitin protein ligase 1               |
| Smarcc1      | 6       | 4      |        |        |            |        | matrix assoc., actin dep. regulator chromatin c1     |

Table S1B

## Proteins preferentially recovered in ASML-wt and ASML-cld7mPalm cells

| Synonym    | ASML-wt |        | -cljdkd |        | -cl7mPalm |        | Protein Description                        |
|------------|---------|--------|---------|--------|-----------|--------|--------------------------------------------|
|            | Prot.M  | Pept.M | Prot.M  | Pept.M | Prot.M    | Pept.M |                                            |
| Eef1a1     | 395     | 20     |         |        | 431       | 17     | Elongation factor 1-alpha 1                |
| Rpl7       | 15      | 9      |         |        | 9         | 5      | 60S ribosomal protein L7                   |
| Rap1a      | 22      | 8      |         |        | 19        | 6      | Ras-related protein Rap-1A                 |
| Rab6a      | 24      | 7      |         |        | 13        | 4      | Ras-related protein Rab-6A                 |
| Gdi1       | 8       | 5      |         |        | 7         | 4      | Rab GDP dissociation inhibitor alpha       |
| Itgb4      | 8       | 5      |         |        | 5         | 4      | Integrin beta 4                            |
| Sec23a     | 9       | 5      |         |        | 7         | 4      | Sec23 homolog A, coat complex II component |
| Anln1      | 7       | 4      |         |        | 4         | 3      | anillin, actin binding protein-like 1      |
| Prpsap2    | 5       | 4      | 2       | 1      | 3         | 3      | Pyrophosphate synthase-assoc. protein2     |
| Rab35      | 31      | 4      |         |        | 19        | 3      | Ras-related protein Rab-35                 |
| RGD1564698 | 11      | 4      |         |        | 8         | 3      | similar to ribosomal protein S10           |
| Serpinb6   | 5       | 4      | 2       | 1      | 12        | 9      | serpin family B member 6                   |

Table S1C

## Proteins preferentially recovered in ASML-wt and ASML-cld7kd cells

| Synonym | ASML-wt |        | -cljdkd |        | -cl7mPalm |        | Protein Description                                |
|---------|---------|--------|---------|--------|-----------|--------|----------------------------------------------------|
|         | Prot.M  | Pept.M | Prot.M  | Pept.M | Prot.M    | Pept.M |                                                    |
| Hdlbp   | 32      | 17     | 21      | 11     | 10        | 4      | High density lipoprotein bind. protein (Vigilin)   |
| Eif4a2  | 50      | 15     | 44      | 10     |           |        | Eukaryotic initiation factor 4A-II                 |
| Ppidl1  | 25      | 12     | 23      | 11     |           |        | peptidylprolyl isomerase D-like 1                  |
| Eif2s3  | 18      | 10     | 14      | 9      |           |        | Eukaryotic translate. initiation factor2 subunit 3 |
| Arf3    | 38      | 10     | 61      | 13     |           |        | ADP-ribosylation factor 3                          |
| Cdk1    | 19      | 10     | 24      | 11     |           |        | Cyclin-dependent kinase 1                          |
| Lmna    | 14      | 10     | 15      | 10     | 6         | 3      | Lamin A                                            |
| Rps2    | 19      | 10     | 13      | 7      |           |        | 40S ribosomal protein S2                           |
| Rps15a  | 18      | 6      | 32      | 7      |           |        | 40S ribosomal protein S15a                         |
| Sec24a  | 7       | 6      | 15      | 7      |           |        | SEC24 homolog A, COPII coat complex comp.          |
| Ssb     | 9       | 6      | 6       | 4      |           |        | Lupus La protein homolog                           |
| Cotl1   | 9       | 5      | 5       | 5      |           |        | Coactosin-like protein                             |
| Abce1   | 5       | 5      | 3       | 2      |           |        | ATP-binding cassette, sub-family E member 1        |
| Ddx5    | 9       | 5      | 7       | 5      |           |        | DEAD (Asp-Glu-Ala-Asp) box polypeptide 5           |
| Mcu     | 9       | 5      | 6       | 4      | 2         | 1      | mitochondrial calcium uniporter                    |
| Rpl10   | 13      | 5      | 15      | 5      |           |        | 60S ribosomal protein L10                          |
| Tubb1   | 29      | 5      | 33      | 4      |           |        | tubulin beta 1 class VI                            |
| Rpl13a  | 8       | 4      | 8       | 5      | 2         | 1      | 60S ribosomal protein L13a                         |
| Tpm4    | 7       | 4      | 7       | 5      |           |        | Tropomyosin alpha-4 chain                          |

Table S1D

**Proteins enriched in ASML-wt compared to -cld7kd and -cld7mP cells****Cargo concentration in the ER (R-RNO-5694530)**

|        |                          |
|--------|--------------------------|
| Sec24b | Protein Sec24b           |
| Ctsz   | Cathepsin Z              |
| Sec24c | LOC685144 protein;Sec24c |
| Mia3   | Protein Mia3             |

**ER to Golgi Anterograde Transport (R-RNO-199977)**

|        |                                           |
|--------|-------------------------------------------|
| Q4AEF8 | Coatomer subunit gamma-1;Copg1            |
| Golgb1 | Protein Golgb1                            |
| Sec24b | Protein Sec24b                            |
| Ctsz   | Cathepsin Z                               |
| Sec24c | LOC685144 protein;Sec24c                  |
| Mia3   | Protein Mia3                              |
| Napa   | Alpha-soluble NSF attachment protein;Napa |
| Cope   | Coatomer protein complex, subunit epsilon |

**Intra-Golgi and retrograde Golgi-to-ER traffic (R-RNO-6811442)**

|        |                                           |
|--------|-------------------------------------------|
| Golga4 | Golgin subfamily A member 4               |
| Q4AEF8 | Coatomer subunit gamma-1;Copg1            |
| Rab6a  | Ras-related protein Rab-6A                |
| Vamp4  | Protein Vamp4                             |
| Kif4a  | Protein Kif4a                             |
| Trip11 | Protein Trip11                            |
| Napa   | Alpha-soluble NSF attachment protein;Napa |
| Cope   | Coatomer protein complex, subunit epsilon |

**Transport to the Golgi and subsequent modification (R-RNO-948021)**

|        |                                                |
|--------|------------------------------------------------|
| Q4AEF8 | Coatomer subunit gamma-1;Copg1                 |
| Golgb1 | Protein Golgb1                                 |
| Sec24b | Protein Sec24b                                 |
| Ctsz   | Cathepsin Z                                    |
| Sec24c | LOC685144 protein;Sec24c                       |
| Mia3   | Protein Mia3                                   |
| Napa   | Alpha-soluble NSF attachment protein;Napa      |
| Cope   | Coatomer protein complex, subunit epsilon;Cope |

**Membrane Trafficking (R-RNO-199991)**

|        |                                                     |
|--------|-----------------------------------------------------|
| Golga4 | Golgin subfamily A member 4;                        |
| Q4AEF8 | Coatomer subunit gamma-1;Copg1                      |
| Rab6a  | Ras-related protein Rab-6A                          |
| Vamp4  | Protein Vamp4                                       |
| Kif4a  | Protein Kif4a                                       |
| Golgb1 | Protein Golgb1                                      |
| Ap2a1  | Adaptor protein complex AP-2, alpha 1 subunit;Ap2a1 |
| Sec24b | Protein Sec24b                                      |
| Ctsz   | Cathepsin Z;Ctsz                                    |
| Sec24c | LOC685144 protein;Sec24c                            |
| Trip11 | Protein Trip11                                      |
| Rala   | Ras-related protein Ral-A;Rala                      |
| Mia3   | Protein Mia3                                        |
| Napa   | Alpha-soluble NSF attachment protein;Napa           |
| Tf     | Serotransferrin;Tf                                  |
| Cope   | Coatomer protein complex, subunit epsilon;Cope      |

**Vesicle-mediated transport (R-RNO-5653656)**

|        |                                                     |
|--------|-----------------------------------------------------|
| Golga4 | Golgin subfamily A member 4;Golga4                  |
| Q4AEF8 | Coatomer subunit gamma-1;Copg1                      |
| Rab6a  | Ras-related protein Rab-6A                          |
| Vamp4  | Protein Vamp4                                       |
| Kif4a  | Protein Kif4a                                       |
| Golgb1 | Protein Golgb1                                      |
| Ap2a1  | Adaptor protein complex AP-2, alpha 1 subunit;Ap2a1 |
| Sec24b | Protein Sec24b                                      |
| Ctsz   | Cathepsin Z;Ctsz                                    |
| Sec24c | LOC685144 protein;Sec24c                            |
| Trip11 | Protein Trip11                                      |
| Rala   | Ras-related protein Ral-A;Rala                      |
| Lrp1   | Protein Lrp1                                        |
| Mia3   | Protein Mia3                                        |
| Napa   | Alpha-soluble NSF attachment protein;Napa           |

Table S3D continued

|                                                               |                                                                                      |
|---------------------------------------------------------------|--------------------------------------------------------------------------------------|
| Tf                                                            | Serotransferrin;Tf                                                                   |
| Cope                                                          | Coatomer protein complex, subunit epsilon;Cope                                       |
| <b>Asparagine N-linked glycosylation (R-RNO-446203)</b>       |                                                                                      |
| Q4AEF8                                                        | Coatomer subunit gamma-1;Copg1                                                       |
| Golgb1                                                        | Protein Golgb1                                                                       |
| Sec24b                                                        | Protein Sec24b                                                                       |
| Ctsz                                                          | Cathepsin Z;Ctsz                                                                     |
| Sec24c                                                        | LOC685144 protein;Sec24c                                                             |
| Mlec                                                          | Malectin;Mlec                                                                        |
| Mia3                                                          | Protein Mia3                                                                         |
| Napa                                                          | Alpha-soluble NSF attachment protein;Napa                                            |
| Cope                                                          | Coatomer protein complex, subunit epsilon;Cope                                       |
| <b>Post-translational protein modification (R-RNO-597592)</b> |                                                                                      |
| Q4AEF8                                                        | Coatomer subunit gamma-1;Copg1                                                       |
| rCG_63409                                                     | Proteasome subunit beta type;rCG_63409                                               |
| Golgb1                                                        | Protein Golgb1                                                                       |
| Sec24b                                                        | Protein Sec24b                                                                       |
| Ctsz                                                          | Cathepsin Z;Ctsz                                                                     |
| Sec24c                                                        | LOC685144 protein;Sec24c                                                             |
| Usp9x                                                         | Protein Usp9x                                                                        |
| Smc1a                                                         | Structural maintenance of chromosomes protein 1A;Smc1a                               |
| Psmb5                                                         | Proteasome subunit beta type-5;Psmb5                                                 |
| Mlec                                                          | Malectin;Mlec                                                                        |
| Ogt                                                           | UDP-N-acetylglucosamine--peptide N-acetylglucosaminyltransferase 110 kDa subunit;Ogt |
| Hcfc1                                                         | Protein Hcfc1                                                                        |
| Usp15                                                         | Ubiquitin carboxyl-terminal hydrolase 15;Usp15;ortholog                              |
| Mia3                                                          | Protein Mia3;Mia3;ortholog                                                           |
| Napa                                                          | Alpha-soluble NSF attachment protein;Napa                                            |
| Tp53bp1                                                       | Protein Tp53bp1                                                                      |
| Cope                                                          | Coatomer protein complex, subunit epsilon;Cope                                       |
| <b>Metabolism of proteins (R-RNO-392499)</b>                  |                                                                                      |
| Q4AEF8                                                        | Coatomer subunit gamma-1;Copg1                                                       |
| rCG_63409                                                     | Proteasome subunit beta type;rCG_63409                                               |
| Golgb1                                                        | Protein Golgb1                                                                       |
| Sec24b                                                        | Protein Sec24b                                                                       |
| Ctsz                                                          | Cathepsin Z;Ctsz                                                                     |
| Sec24c                                                        | LOC685144 protein;Sec24c                                                             |
| Usp9x                                                         | Protein Usp9x                                                                        |
| Gnai3                                                         | Guanine nucleotide-binding protein G(k) subunit alpha;Gnai3                          |
| Smc1a                                                         | Structural maintenance of chromosomes protein 1A;Smc1a                               |
| Psmb5                                                         | Proteasome subunit beta type-5;Psmb5                                                 |
| Mlec                                                          | Malectin;Mlec                                                                        |
| Ogt                                                           | UDP-N-acetylglucosamine--peptide N-acetylglucosaminyltransferase 110 kDa subunit;Ogt |
| Hcfc1                                                         | Protein Hcfc1                                                                        |
| Usp15                                                         | Ubiquitin carboxyl-terminal hydrolase 15;Usp15                                       |
| Eif2s3                                                        | Eukaryotic translation initiation factor 2 subunit 3, X-linked;Eif2s3                |
| Mia3                                                          | Protein Mia3                                                                         |
| Napa                                                          | Alpha-soluble NSF attachment protein;Napa                                            |
| Tp53bp1                                                       | Protein Tp53bp1;Tp53bp1;ortholog                                                     |
| Cope                                                          | Coatomer protein complex, subunit epsilon;Cope                                       |
| <b>Metabolism (R-RNO-1430728)</b>                             |                                                                                      |
| Gls                                                           | Glutaminase kidney isoform, mitochondrial;Gls                                        |
| Ckb                                                           | Choline/ethanolamine kinase;Chkb                                                     |
| Akr1c12l1                                                     | Aldo-keto reductase family 1, member C12-like 1;Akr1c12l1                            |
| Acox1                                                         | Peroxisomal acyl-coenzyme A oxidase 1;Acox1                                          |
| LOC102554637                                                  | Protein LOC102554637                                                                 |
| rCG_63409                                                     | Proteasome subunit beta type;rCG_63409                                               |
| Gls                                                           | Glutaminase liver isoform, mitochondrial;Gls2                                        |
| Ap2a1                                                         | Adaptor protein complex AP-2, alpha 1 subunit;Ap2a1                                  |
| Ckb                                                           | Creatine kinase B-type;Ckb                                                           |
| Hk2                                                           | Hexokinase-2;Hk2                                                                     |
| Cbr4                                                          | Carbonyl reductase family member 4;Cbr4                                              |
| A0A0G2K099                                                    | Uncharacterized protein;unassigned                                                   |
| Pdhb                                                          | Pyruvate dehydrogenase E1 component subunit beta, mitochondrial;Pdhb                 |
| Esyt1                                                         | Extended synaptotagmin-1;Esyt1                                                       |

Table S3D continued

|              |                                                                         |
|--------------|-------------------------------------------------------------------------|
| Ldhb         | L-lactate dehydrogenase B chain;Ldhb                                    |
| Psmb5        | Proteasome subunit beta type-5;Psmb5                                    |
| ldh3g        | Isocitrate dehydrogenase [NAD] subunit gamma 1, mitochondrial;ldh3g     |
| Pecr         | Peroxisomal trans-2-enoyl-CoA reductase;Pecr                            |
| Far1         | Fatty acyl-CoA reductase 1;Far1                                         |
| LOC100359539 | Protein LOC100359539                                                    |
| Ppp1cc       | Serine/threonine-protein phosphatase PP1-gamma catalytic subunit;Ppp1cc |
| Eno2         | Gamma-enolase;Eno2                                                      |
| Lrp1         | Protein Lrp1                                                            |
| Hibadh       | 3-hydroxyisobutyrate dehydrogenase, mitochondrial;Hibadh                |
| Acsl4        | Long-chain-fatty-acid--CoA ligase 4;Acsl4                               |
| Akr7a2       | Aflatoxin B1 aldehyde reductase member 2;Akr7a2                         |

Table S1E

## Proteins preferentially recovered in ASML-wt TEX

| Synonym      | ASML-wt TEX |        | -cld7kd TEX |        | -cld7mPalm TEX |        | Protein Description                                   |
|--------------|-------------|--------|-------------|--------|----------------|--------|-------------------------------------------------------|
|              | Prot.M      | Pept.M | Prot.M      | Pept.M | Prot.M         | Pept.M |                                                       |
| CD166        | 34          | 12     | 1           | 1      |                |        | CD166, activated leukoc. adhesion molecule, Alcam     |
| Clic1        | 25          | 7      |             |        |                |        | chloride intracellular channel 1                      |
| Ctps1        | 13          | 4      |             |        |                |        | CTP synthase 1                                        |
| Dcps         | 31          | 9      | 5           | 2      | 5              | 2      | decapping enzyme, scavenger                           |
| Eif2s1       | 41          | 11     | 13          | 4      | 19             | 6      | eukaryotic translation initiation factor 2 subunit 1  |
| Eif2s3x      | 28          | 6      |             |        |                |        | eukaryotic translation initiation factor 2, subunit 3 |
| Hist1h2b     | 279         | 8      |             |        |                |        | histone H2B                                           |
| Ide          | 52          | 11     | 14          | 4      | 17             | 5      | insulin-degrading enzyme                              |
| Itga2        | 13          | 8      | 2           | 2      |                |        | integrin alpha-2                                      |
| Kb15         | 41          | 5      |             |        |                |        | keratin, type II cytoskeletal cochlear                |
| Krt6         | 70          | 12     | 35          | 3      | 39             | 3      | keratin, type II cytoskeletal 6A                      |
| LOC100910554 | 53          | 5      |             |        |                |        | histone H2A type 1-like                               |
| LOC102552480 | 255         | 6      |             |        |                |        | histone H2B type 2-E                                  |
| Muc4         | 15          | 9      | 2           | 1      |                |        | mucin 4                                               |
| Myo10        | 54          | 10     |             |        |                |        | myosin-10                                             |
| Psmd12       | 24          | 13     | 9           | 4      | 6              | 4      | 26S proteasome non-ATPase regulatory subunit 12       |
| Ras          | 38          | 6      |             |        |                |        | ras protein                                           |
| rCG33456c    | 72          | 18     |             |        |                |        | rCG33456, isoform CRA_c                               |
| Rdx          | 102         | 9      |             |        |                |        | radixin                                               |
| Rpa1         | 19          | 8      | 1           | 1      | 2              | 1      | replication protein A 70 kDa DNA-binding subunit      |
| Tuba8        | 79          | 5      |             |        |                |        | tubulin alpha-8 chain                                 |

Table S1F

## Proteins preferentially recovered in ASML-wt and ASML-cld7mPalm TEX

| Synonym  | ASML-wt TEX |        | -cld7kd TEX |        | -cld7mPalm TEX |        | Protein Description                     |
|----------|-------------|--------|-------------|--------|----------------|--------|-----------------------------------------|
|          | Prot.M      | Pept.M | Prot.M      | Pept.M | Prot.M         | Pept.M |                                         |
| Hspa1a   | 304         | 24     |             |        | 541            | 29     | dnaK-type molecular chaperone hsp72-ps1 |
| Lta4h    | 15          | 7      |             |        | 73             | 15     | Leukotriene A-4 hydrolase               |
| Mdh2     | 79          | 12     |             |        | 114            | 14     | malate dehydrogenase, mitochondrial     |
| rCG26466 | 25          | 5      |             |        | 19             | 3      | rCG26466, isoform CRA_b                 |
| Rpl7     | 13          | 8      |             |        | 22             | 8      | ribosomal protein L7                    |
| Tsnax    | 29          | 11     | 7           | 5      | 21             | 10     | translin-associated protein X           |

Table S1G

## Proteins preferentially recovered in ASML-wt and ASML-cld7kd TEX

| Synonym  | ASML-wt TEX |        | -cld7kd TEX |        | -cld7mPalm TEX |        | Protein Description                                        |
|----------|-------------|--------|-------------|--------|----------------|--------|------------------------------------------------------------|
|          | Prot.M      | Pept.M | Prot.M      | Pept.M | Prot.M         | Pept.M |                                                            |
| Actn1    | 46          | 13     | 43          | 11     |                |        | alpha-actinin-1                                            |
| Eif3t    | 33          | 8      | 47          | 10     |                |        | eukaryotic translation initiat. factor 3, subunit 10 theta |
| Ggt1     | 11          | 4      | 13          | 5      |                |        | gamma-glutamyl transpeptidase                              |
| H2afx    | 96          | 6      | 82          | 6      |                |        | H2A histone family, member X                               |
| Hsp71    | 725         | 34     | 582         | 29     |                |        | heat shock protein71                                       |
| Krt14    | 45          | 10     | 32          | 6      |                |        | keratin, type I cytoskeletal 14                            |
| Krt16    | 34          | 8      | 18          | 3      |                |        | keratin, type I cytoskeletal 16                            |
| Krt17    | 45          | 12     | 34          | 9      |                |        | keratin, type I cytoskeletal 17                            |
| Krt42    | 41          | 11     | 24          | 5      |                |        | keratin, type I cytoskeletal 42                            |
| Krt5     | 57          | 12     | 33          | 6      |                |        | keratin, type II cytoskeletal 5                            |
| Lgals3bp | 52          | 11     | 88          | 14     | 2              | 1      | galectin-3-binding protein                                 |
| Psat1    | 8           | 3      | 9           | 5      |                |        | phosphoserine aminotransferase                             |
| PVR      | 8           | 5      | 4           | 2      |                |        | tumor-associated glycoprotein E4, poliovirus receptor      |
| rCG30479 | 11          | 5      | 18          | 6      |                |        | rCG30479, isoform CRA_a                                    |
| rCG47614 | 84          | 4      | 165         | 4      |                |        | rCG47614, isoform CRA_f                                    |
| Rtn4     | 8           | 3      | 12          | 6      |                |        | reticulon-4                                                |
| S100a14  | 8           | 5      | 5           | 3      |                |        | S100 calcium binding protein A14                           |
| Tuba1b   | 129         | 12     | 186         | 13     |                |        | tubulin alpha                                              |

Table S1H

**Proteins enriched in ASML-wt compared to -cld7kd and -cld7mP TEX****ER to Golgi Anterograde Transport (R-RNO-199977)**

|        |                                                 |
|--------|-------------------------------------------------|
| Copb1  | Coatomer subunit beta;Copb1                     |
| Sptbn1 | Protein Sptbn1                                  |
| Sptan1 | Spectrin alpha chain, non-erythrocytic 1;Sptan1 |
| Uso1   | General vesicular transport factor p115;Uso1    |
| Ykt6   | Synaptobrevin homolog YKT6                      |
| Ctsz   | Cathepsin Z;Ctsz                                |
| Sec13  | Protein SEC13                                   |

**Transport to the Golgi and subsequent modification (R-RNO-948021)**

|        |                                                 |
|--------|-------------------------------------------------|
| Copb1  | Coatomer subunit beta;Copb1                     |
| Sptbn1 | Protein Sptbn1                                  |
| Sptan1 | Spectrin alpha chain, non-erythrocytic 1;Sptan1 |
| Uso1   | General vesicular transport factor p115;Uso1    |
| Ykt6   | Synaptobrevin homolog YKT6                      |
| Ctsz   | Cathepsin Z;Ctsz                                |
| Sec13  | Protein SEC13 homolog                           |

**Membrane Trafficking (R-RNO-199991)**

|        |                                                 |
|--------|-------------------------------------------------|
| Copb1  | Coatomer subunit beta;Copb1                     |
| Sptbn1 | Protein Sptbn1                                  |
| Sptan1 | Spectrin alpha chain, non-erythrocytic 1;Sptan1 |
| Uso1   | General vesicular transport factor p115;Uso1    |
| Ykt6   | Synaptobrevin homolog YKT6                      |
| Rab18  | Ras-related protein Rab-18;Rab18                |
| Ctsz   | Cathepsin Z;Ctsz                                |
| Dnm1   | Dynamin-1;Dnm1                                  |
| Snx2   | Protein Snx2                                    |
| Cltc   | Clathrin heavy chain 1;Cltc                     |
| Sec13  | Protein SEC13                                   |

**Vesicle-mediated transport (R-RNO-5653656)**

|        |                                                 |
|--------|-------------------------------------------------|
| Copb1  | Coatomer subunit beta;Copb1                     |
| Sptbn1 | Protein Sptbn1                                  |
| Sptan1 | Spectrin alpha chain, non-erythrocytic 1;Sptan1 |
| Uso1   | General vesicular transport factor p115;Uso1    |
| Ykt6   | Synaptobrevin homolog YKT6                      |
| Rab18  | Ras-related protein Rab-18;Rab18                |
| Ctsz   | Cathepsin Z;Ctsz                                |
| Dnm1   | Dynamin-1;Dnm1                                  |
| Snx2   | Protein Snx2                                    |
| Cltc   | Clathrin heavy chain 1;Cltc                     |
| Sec13  | Protein SEC13                                   |



Table S11

## Higher protein recovery in ASML cells versus TEX

| Synonym  | ASML-wt cells |        | ASML-wt TEX |        | Synonym       | ASML-wt cells |        | ASML-wt TEX |        |
|----------|---------------|--------|-------------|--------|---------------|---------------|--------|-------------|--------|
|          | Prot.M        | Pept.M | Prot.M      | Pept.M |               | Prot.M        | Pept.M | Prot.M      | Pept.M |
| Ahnak    | 3921          | 581    |             |        | Ptgr1         | 154           | 37     | 10          | 5      |
| Dync1h1  | 1988          | 478    |             |        | Actn2         | 152           | 41     |             |        |
| Hsp90ab1 | 1557          | 138    |             |        | Nnt           | 152           | 51     |             |        |
| Actb     | 1540          | 72     |             |        | Tubb3         | 149           | 17     |             |        |
| Flna     | 1499          | 312    | 165         | 38     | P4hb          | 147           | 59     |             |        |
| Myh9     | 1293          | 252    | 315         | 55     | LOC100363782  | 145           | 23     |             |        |
| Fasn     | 1262          | 228    | 28          | 9      | Ywhaq         | 145           | 42     |             |        |
| Sptan1   | 905           | 313    | 80          | 28     | AI314180      | 144           | 78     |             |        |
| Sptbn1   | 855           | 268    | 20          | 11     | Arf4          | 142           | 28     |             |        |
| Tubb4b   | 722           | 77     |             |        | ASCT2         | 140           | 20     |             |        |
| Tubb5    | 714           | 77     |             |        | Hyou1         | 138           | 55     | 3           | 1      |
| Actn1    | 588           | 144    | 43          | 11     | Arhgdia       | 136           | 31     |             |        |
| Iqgap1   | 588           | 202    | 87          | 31     | Rpn1          | 134           | 44     |             |        |
| Hspd1    | 576           | 102    |             |        | Snd1          | 134           | 60     | 40          | 11     |
| Actc1    | 563           | 39     |             |        | Trim28        | 134           | 43     |             |        |
| Myof     | 559           | 222    | 67          | 29     | Gnb2l1        | 133           | 49     |             |        |
| Myh10    | 494           | 217    | 179         | 38     | Ywhaz         | 133           | 42     | 38          | 4      |
| Tuba4a   | 471           | 59     |             |        | Golgb1        | 132           | 82     |             |        |
| Rps27a   | 469           | 26     |             |        | Atic          | 130           | 65     |             |        |
| Tln1     | 455           | 151    |             |        | Uggt1         | 130           | 70     |             |        |
| Flnb     | 451           | 172    | 6           | 3      | Pdia3         | 129           | 47     | 4           | 3      |
| Igf2r    | 408           | 145    | 21          | 14     | Ahcy          | 128           | 53     |             |        |
| Ubr4     | 374           | 188    |             |        | Hnrpk protein | 127           | 38     |             |        |
| Tubb6    | 364           | 50     |             |        | JH06_4067     | 127           | 34     |             |        |
| Akap9    | 340           | 180    |             |        | Fancd2        | 126           | 18     |             |        |
| Actbl2   | 326           | 27     |             |        | Mthfd1l       | 126           | 47     |             |        |
| Eif5a    | 322           | 33     |             |        | Ppib          | 124           | 39     | 14          | 5      |
| Gcn1l1   | 319           | 120    |             |        | Sec31a        | 124           | 53     |             |        |
| Gstp1    | 316           | 33     |             |        | HUWE1         | 123           | 57     |             |        |
| Akr1b8   | 299           | 55     | 11          | 4      | Arf5          | 122           | 33     |             |        |
| Eprs     | 289           | 121    | 76          | 15     | Kif5b         | 120           | 63     |             |        |
| Plec     | 277           | 148    | 5           | 4      | Rock2         | 119           | 40     | 2           | 2      |
| Fam49b   | 275           | 37     |             |        | Gart          | 117           | 59     |             |        |
| Tpr      | 266           | 82     |             |        | Iars          | 115           | 58     |             |        |
| P97621   | 261           | 10     |             |        | Macf1         | 113           | 60     |             |        |
| Pdcd6    | 258           | 89     |             |        | Pdia4         | 111           | 45     |             |        |
| Copa     | 255           | 72     | 8           | 4      | Ncl           | 110           | 42     | 2           | 2      |
| Slc25a4  | 253           | 37     |             |        | Rps3          | 109           | 44     |             |        |
| Slc25a5  | 249           | 39     |             |        | Stmn1         | 109           | 40     |             |        |
| Tmed10   | 230           | 26     |             |        | Uso1          | 108           | 42     | 4           | 3      |
| Ywhae    | 228           | 53     |             |        | Prmt1         | 107           | 35     |             |        |
| Chd4     | 215           | 81     | 5           | 2      | Lrrc59        | 106           | 27     |             |        |
| Atp5a1   | 213           | 64     | 4           | 3      | Rab8a         | 106           | 16     |             |        |
| Lrpprc   | 208           | 111    |             |        | Fabp5         | 105           | 21     |             |        |
| Mthfd1   | 206           | 64     |             |        | Usp9x         | 105           | 55     |             |        |
| Hsph1    | 205           | 66     |             |        | Hnrnpa2b1     | 103           | 32     |             |        |
| Pgam1    | 197           | 50     |             |        | Ap2b1         | 102           | 37     |             |        |
| Stip1    | 195           | 68     |             |        | Aldh2         | 100           | 43     |             |        |
| Rnf213   | 192           | 108    |             |        | Psmd1         | 100           | 50     | 16          | 8      |
| Tagln2   | 189           | 31     | 9           | 4      | LOC102551071  | 99            | 24     |             |        |
| Vcp      | 188           | 73     |             |        | LOC681718     | 99            | 28     |             |        |
| Vdac1    | 188           | 43     | 7           | 4      | Psat1         | 99            | 46     | 9           | 5      |
| Eif4g1   | 187           | 76     |             |        | Rpn2          | 98            | 32     |             |        |
| Txn      | 179           | 17     |             |        | Smc3          | 97            | 50     |             |        |
| Atp2a2   | 174           | 45     | 6           | 2      | Esyt1         | 96            | 43     |             |        |
| Trap1    | 174           | 47     |             |        | Lrba          | 95            | 41     |             |        |
| Rdx      | 171           | 48     | 102         | 9      | Map4          | 95            | 40     |             |        |
| Slc25a3  | 167           | 29     |             |        | RGD1561636    | 95            | 16     |             |        |
| Birc6    | 158           | 64     |             |        | Tars          | 95            | 50     | 3           | 3      |
| Gm11214  | 155           | 6      |             |        | Mob1a         | 94            | 28     |             |        |
| Arf3     | 154           | 33     |             |        | RpS12         | 94            | 19     |             |        |
| Gars     | 154           | 63     |             |        | Paics         | 93            | 49     |             |        |

Table S1J

## Higher protein recovery in ASML-wt TEX than cells

| Synonym      | ASML-wt TEX |        | ASML-wt cells |         | Synonym        | ASML-wt TEX |        | ASML-wt cells |         |
|--------------|-------------|--------|---------------|---------|----------------|-------------|--------|---------------|---------|
|              | Prot.M      | Pept.M | Pept.M        | Synonym |                | Prot.M      | Pept.M | Pept.M        | Synonym |
| LOC100910366 | 982         | 35     |               |         | Fdps           | 50          | 10     |               |         |
| Mvp          | 747         | 99     | 31            | 16      | Serinc5        | 43          | 7      |               |         |
| Mfge8        | 494         | 64     |               |         | Il24           | 42          | 13     |               |         |
| Akr2         | 466         | 40     |               |         | Cldn7          | 41          | 6      |               |         |
| Ptgfrn       | 446         | 91     |               |         | Cldn4          | 40          | 6      |               |         |
| Htra1        | 426         | 48     |               |         | Atp6ap2        | 39          | 14     |               |         |
| CD9          | 416         | 30     | 21            | 3       | Dera           | 39          | 14     |               |         |
| JH06 5301    | 376         | 51     |               |         | F5             | 36          | 15     |               |         |
| Sdcbp        | 337         | 16     |               |         | Mfi2           | 33          | 17     |               |         |
| Mat1a        | 330         | 39     |               |         | Sdcbp2         | 32          | 7      |               |         |
| Ubb          | 316         | 14     |               |         | Slc44a2        | 31          | 9      |               |         |
| Asns         | 240         | 32     | 8             | 3       | Plod1          | 29          | 9      |               |         |
| Clu          | 239         | 34     |               |         | rCG30479       | 29          | 11     |               |         |
| rCG47614     | 229         | 8      |               |         | CD59           | 28          | 9      |               |         |
| Asl          | 226         | 34     | 5             | 3       | Tsnax          | 28          | 15     | 9             | 3       |
| Tspan8       | 222         | 16     | 5             | 3       | Clic1          | 25          | 7      |               |         |
| Itga6        | 199         | 82     | 28            | 17      | Fbxo6          | 25          | 12     | 2             | 2       |
| Itgb1        | 189         | 63     | 28            | 18      | transmembr.pr. | 25          | 6      |               |         |
| Ppp1r7       | 152         | 35     | 12            | 7       | Tsta           | 25          | 10     | 2             | 2       |
| Ubc          | 145         | 7      |               |         | CD151          | 24          | 8      |               |         |
| Lgals3bp     | 142         | 26     |               |         | Ggt1           | 24          | 9      |               |         |
| CD82         | 140         | 25     |               |         | JH06 4591      | 24          | 11     |               |         |
| C3           | 134         | 22     |               |         | M6pr           | 24          | 7      |               |         |
| Fn1          | 133         | 57     |               |         | Thbs1          | 24          | 11     | 3             | 2       |
| JH06 2394    | 132         | 31     |               |         | Brox           | 22          | 6      |               |         |
| Itga3        | 126         | 48     | 23            | 9       | Col18a1        | 22          | 8      |               |         |
| rCG27764     | 123         | 33     |               |         | LOC100911244   | 22          | 6      |               |         |
| LOC100910688 | 121         | 22     |               |         | rCG38382       | 22          | 12     |               |         |
| Grwd1        | 118         | 29     |               |         | Tinagl1        | 21          | 10     |               |         |
| rCG58353     | 118         | 17     |               |         | Dnm1           | 18          | 6      |               |         |
| Ist1         | 117         | 20     |               |         | Pbdc1          | 17          | 6      |               |         |
| CD63         | 114         | 18     |               |         | Tspan4         | 17          | 6      |               |         |
| Epcam        | 99          | 15     | 4             | 3       | Adh1           | 16          | 9      |               |         |
| Itih2        | 95          | 6      |               |         | Aqp4           | 16          | 6      |               |         |
| Prom1        | 93          | 31     |               |         | Uxs1           | 16          | 7      |               |         |
| Adam10       | 85          | 21     |               |         | Cldn9          | 14          | 6      |               |         |
| Tspan6       | 85          | 12     |               |         | LOC102551877   | 14          | 7      |               |         |
| F2           | 84          | 15     |               |         | rCG24688       | 14          | 6      |               |         |
| rCG55067     | 84          | 13     |               |         | rCG30666       | 14          | 9      |               |         |
| Plekhb2      | 82          | 25     |               |         | rCG55135       | 14          | 7      |               |         |
| Serpinf1     | 81          | 6      |               |         | Itgav          | 11          | 6      |               |         |
| Plscr3       | 79          | 14     |               |         | Hba1           | 10          | 2      |               |         |
| Cds1         | 75          | 11     |               |         | Jam            | 10          | 6      |               |         |
| Itgb4        | 74          | 42     | 13            | 8       | Ptprf          | 10          | 6      |               |         |
| rCG33456     | 72          | 18     |               |         | Adam17         | 9           | 6      |               |         |
| Fth1         | 69          | 12     |               |         | Adh3           | 9           | 6      |               |         |
| Nop2         | 67          | 16     |               |         | Clta           | 9           | 6      |               |         |
| rCG24640     | 65          | 17     |               |         | Adam9          | 8           | 6      |               |         |
| Ppp2ca       | 61          | 11     |               |         | Cdhr1          | 8           | 6      |               |         |
| Rplp2        | 60          | 19     |               |         | Itgb3          | 8           | 6      |               |         |
| LOC102551657 | 58          | 15     |               |         | Jup            | 8           | 6      |               |         |
| Ttyh3        | 53          | 6      |               |         | C4             | 7           | 6      |               |         |
| rCG42612     | 52          | 12     |               |         | Itga2b         | 7           | 6      |               |         |
| Serpinc1     | 52          | 11     |               |         | Fgb            | 6           | 6      |               |         |
| Vps28        | 52          | 15     | 2             | 2       | Slc12a1        | 6           | 3      |               |         |
| Tspan14      | 51          | 13     |               |         |                |             |        |               |         |

Table S1K

## Higher protein recovery in ASML-wt TEX than ASML-cld7kd cells

| Synonym      | ASML-wt TEX |         | -clد7kd cells |         | Synonym      | ASML-wt TEX |         | -clد7kd cells |         |
|--------------|-------------|---------|---------------|---------|--------------|-------------|---------|---------------|---------|
|              | Prot.M      | Pept.M. | Prot.M        | Pept.M. |              | Prot.M      | Pept.M. | Prot.M        | Pept.M. |
| Hspa1a       | 304         | 24      | 41            | 4       | Apob         | 25          | 8       | 4             | 2       |
| Hist1h2b     | 279         | 8       |               |         | Cops3        | 25          | 10      | 6             | 4       |
| LOC102552480 | 255         | 6       |               |         | LOC102551657 | 24          | 5       |               |         |
| Ptgfrn       | 180         | 30      |               |         | CD63         | 24          | 4       |               |         |
| Eno1         | 158         | 15      | 38            | 7       | Krt15        | 22          | 4       |               |         |
| Mvp          | 152         | 29      | 8             | 4       | Adam10       | 21          | 7       |               |         |
| Htra1        | 151         | 16      |               |         | Il24         | 21          | 5       |               |         |
| JH06 5301    | 119         | 16      |               |         | Lypla1       | 21          | 4       | 2             | 1       |
| Mfge8        | 115         | 20      |               |         | Cops6        | 21          | 9       | 5             | 3       |
| Eef1a1       | 110         | 12      |               |         | Ppp2ca       | 20          | 6       |               |         |
| Sdcbp        | 98          | 5       |               |         | Eef1e1       | 20          | 5       |               |         |
| Anxa6        | 90          | 26      | 10            | 4       | Ehd3         | 20          | 3       |               |         |
| Sept7        | 82          | 8       | 18            | 4       | Krt76        | 20          | 3       |               |         |
| Itgb1        | 81          | 19      | 2             | 2       | Hba2         | 20          | 2       |               |         |
| Eif3l        | 74          | 14      | 18            | 7       | Cops4        | 20          | 11      | 7             | 5       |
| CD9          | 72          | 6       | 8             | 3       | Asns         | 19          | 5       | 2             | 1       |
| Itga6        | 70          | 20      | 4             | 2       | Rpa1         | 19          | 8       | 4             | 3       |
| Krt6         | 70          | 12      | 31            | 4       | LOC100910688 | 18          | 5       |               |         |
| Tspan8       | 64          | 5       | 1             | 1       | Fn1          | 17          | 8       |               |         |
| Myo10        | 54          | 10      |               |         | Prom1        | 17          | 8       |               |         |
| C3           | 51          | 8       |               |         | CD59         | 17          | 3       |               |         |
| Ftl1         | 50          | 8       |               |         | Clic1b       | 17          | 3       |               |         |
| Epcam        | 46          | 6       |               |         | Serpib6      | 17          | 6       | 2             | 1       |
| Psmđ6        | 45          | 18      | 7             | 4       | Psmb5        | 17          | 8       | 5             | 2       |
| Krt17        | 45          | 12      | 12            | 5       | Thbs1        | 16          | 6       |               |         |
| Ist1         | 44          | 8       |               |         | Cds1         | 16          | 4       |               |         |
| Itga3        | 44          | 13      | 3             | 2       | Muc4         | 15          | 9       |               |         |
| F2           | 42          | 6       |               |         | Top2a        | 15          | 5       | 2             | 1       |
| Eif3m        | 42          | 11      | 6             | 3       | LOC100910308 | 14          | 5       |               |         |
| Krt42        | 41          | 11      |               |         | Plekfb2      | 14          | 5       |               |         |
| Kb15         | 41          | 5       |               |         | Itga2        | 13          | 8       |               |         |
| Mapk1        | 41          | 10      | 7             | 5       | Rpl7         | 13          | 8       |               |         |
| Ras          | 38          | 6       |               |         | Dctn3        | 13          | 4       |               |         |
| Itih2        | 37          | 2       |               |         | Lum          | 13          | 2       |               |         |
| ldh1         | 37          | 11      | 6             | 3       | Brox         | 12          | 4       |               |         |
| Asl          | 36          | 8       | 1             | 1       | Cldn4        | 12          | 2       |               |         |
| CD166        | 34          | 12      |               |         | Hexb         | 12          | 4       | 2             | 1       |
| Krt16        | 34          | 8       |               |         | Fam175b      | 11          | 5       |               |         |
| Eif3t        | 33          | 8       |               |         | Ggt1         | 11          | 4       |               |         |
| JH06 2394    | 32          | 8       |               |         | Tspan14      | 11          | 4       |               |         |
| Fth1         | 32          | 4       |               |         | Tspan1       | 11          | 2       |               |         |
| Anxa3        | 32          | 12      | 14            | 5       | Slc44a1      | 11          | 4       | 2             | 1       |
| Dcps         | 31          | 9       | 1             | 1       | Itgb4        | 10          | 8       |               |         |
| Psmđ7        | 31          | 10      | 9             | 5       | LOC102551877 | 10          | 6       |               |         |
| Fdps         | 30          | 6       |               |         | Rplp2        | 10          | 5       |               |         |
| Serpinf1     | 30          | 2       |               |         | Plscr3       | 10          | 3       |               |         |
| H2afy        | 29          | 6       |               |         | Hba1         | 10          | 2       |               |         |
| Tsnax        | 29          | 11      | 3             | 1       | Tspan4       | 10          | 2       |               |         |
| Eif2s3x      | 28          | 6       |               |         | Ttyh3        | 10          | 2       |               |         |
| Sept9        | 26          | 6       | 3             | 3       | Coro1c       | 10          | 5       | 1             | 1       |
| Clic1        | 25          | 7       |               |         |              |             |         |               |         |

Table S2

**Distinct recovery of proteins in SW948-wt versus -cld7kd cells and TEX**

Suppl. Table 2A

**Higher recovery of proteins in SW948-wt than -cld7kd cells**

| Synonym  | SW948-wt cells |        | -cld7kd cells |        | Protein Description                                        |
|----------|----------------|--------|---------------|--------|------------------------------------------------------------|
|          | Prot.M         | Pept.M | Prot.M        | Pept.M |                                                            |
| RRBP1    | 35             | 34     | 5             | 5      | Ribosome-binding protein 1                                 |
| IGF2R    | 38             | 32     | 8             | 8      | Cation-independent mannose-6-phosphate receptor            |
| NUMA1    | 30             | 27     | 7             | 7      | Nuclear mitotic apparatus protein 1                        |
| TPR      | 30             | 25     | 6             | 6      | Nucleoprotein TPR                                          |
| ITPR3    | 27             | 24     | 5             | 4      | Inositol 1,4,5-trisphosphate receptor type 3               |
| HNRNPUL2 | 19             | 18     | 1             | 1      | Heterogeneous nuclear ribonucleoprotein U-like protein 2   |
| CTNNB1   | 19             | 16     | 2             | 2      | Catenin beta-1                                             |
| ATP2A2   | 17             | 15     |               |        | Sarcoplasmic/endoplasmic reticulum calcium ATPase 2        |
| MATR3    | 18             | 15     | 1             | 1      | Matrin-3                                                   |
| HNRNPL   | 15             | 14     | 2             | 2      | Heterogeneous nuclear ribonucleoprotein L                  |
| MYO1B    | 14             | 14     | 3             | 3      | Unconventional myosin-Ib                                   |
| HNRNPR   | 13             | 13     |               |        | Heterogeneous nuclear ribonucleoprotein R                  |
| MYH11    | 16             | 13     |               |        | Myosin-11                                                  |
| HNRNPA3  | 12             | 12     | 2             | 3      | Heterogeneous nuclear ribonucleoprotein A3                 |
| SFPQ     | 12             | 12     | 5             | 4      | Splicing factor, proline- and glutamine-rich               |
| STT3A    | 14             | 12     | 5             | 4      | Oligosaccharyltransferase complex, catalytic subunit       |
| UGT1A6   | 13             | 12     |               |        | UDP-glucuronosyltransferase 1-6                            |
| USO1     | 14             | 12     | 3             | 4      | General vesicular transport factor p115                    |
| SMARCA4  | 15             | 11     | 4             | 3      | Transcription activator BRG1                               |
| ACO2     | 13             | 10     | 1             | 1      | Aconitate hydratase, mitochondrial                         |
| AKR1C1   | 13             | 10     |               |        | Aldo-keto reductase family 1 member C1                     |
| CIT      | 11             | 10     | 2             | 1      | Citron Rho-interacting kinase                              |
| DDX17    | 12             | 10     | 2             | 1      | Probable ATP-dependent RNA helicase DDX17                  |
| HNRNPC   | 10             | 10     | 1             | 1      | Heterogeneous nuclear ribonucleoproteins C1/C2             |
| JUP      | 12             | 10     | 2             | 1      | Junction plakoglobin                                       |
| LBR      | 10             | 10     | 2             | 3      | Lamin-B receptor                                           |
| OGDH     | 11             | 10     | 2             | 2      | 2-oxoglutarate dehydrogenase, mitochondrial                |
| OLFM4    | 10             | 10     |               |        | Olfactomedin-4                                             |
| PRKCSH   | 11             | 10     | 3             | 3      | Glucosidase 2 subunit beta                                 |
| SMC1A    | 14             | 10     | 5             | 3      | Structural maintenance of chromosomes protein 1A           |
| STT3B    | 12             | 10     | 3             | 3      | Oligosaccharyltransferase complex, catalytic subunit       |
| COTL1    | 10             | 9      | 3             | 3      | Coactosin-like protein                                     |
| DDX5     | 12             | 9      |               |        | Probable ATP-dependent RNA helicase DDX5                   |
| DDX5     | 12             | 9      | 2             | 3      | Probable ATP-dependent RNA helicase DDX5                   |
| LAMA5    | 11             | 9      | 1             | 1      | Laminin subunit alpha-5                                    |
| MVP      | 13             | 9      | 2             | 2      | Major vault protein                                        |
| MYO1C    | 11             | 9      | 2             | 2      | Unconventional myosin-Ic                                   |
| PRMT1    | 11             | 9      | 3             | 3      | Protein arginine N-methyltransferase 1                     |
| YBX1     | 10             | 9      | 3             | 3      | Nuclease-sensitive element-binding protein 1               |
| AKR1C2   | 12             | 8      |               |        | Aldo-keto reductase family 1 member C2                     |
| FLNC     | 9              | 8      |               |        | Filamin-C                                                  |
| MTHFD1L  | 9              | 8      | 2             | 2      | Monofunctional C1-tetrahydrofolate synthase, mitochondrial |
| TRRAP    | 9              | 8      |               |        | Transformation/transcription domain-associated protein     |
| ERLIN2   | 8              | 7      |               |        | Erlin-2                                                    |
| HSD17B11 | 7              | 7      | 1             | 1      | Estradiol 17-beta-dehydrogenase 11                         |
| HTT      | 9              | 7      | 3             | 2      | Huntingtin                                                 |
| PABPC4   | 9              | 7      |               |        | Polyadenylate-binding protein 4                            |
| PLXNB2   | 8              | 7      |               |        | Plexin-B2                                                  |
| PNPT1    | 9              | 7      | 3             | 2      | Polyribonucleotide nucleotidyltransferase 1, mitochondrial |
| RALY     | 8              | 7      |               |        | RNA-binding protein Raly                                   |
| RIF1     | 8              | 7      | 1             | 1      | Telomere-associated protein RIF1                           |
| UGT1A7   | 7              | 7      |               |        | UDP-glucuronosyltransferase 1-7                            |
| ARMC10   | 6              | 6      | 2             | 2      | Armadillo repeat-containing protein 10                     |
| CD166    | 6              | 6      | 1             | 1      | CD166 antigen ALCAM                                        |
| CDH1     | 6              | 6      | 2             | 2      | Cadherin-1                                                 |
| CUL4A    | 6              | 6      | 2             | 2      | Cullin-4A                                                  |
| EGFR     | 7              | 6      | 1             | 1      | Epidermal growth factor receptor                           |
| EPHX1    | 6              | 6      |               |        | Epoxide hydrolase 1                                        |
| FTH1     | 7              | 6      | 1             | 1      | Ferritin heavy chain                                       |
| HACD3    | 6              | 6      | 1             | 1      | Very-long-chain (3R)-3-hydroxyacyl-CoA dehydratase 3       |

Table S2A cont.

| Synonym | SW948-wt cells |        | -cld7kd cells |        | Protein Description                                                  |
|---------|----------------|--------|---------------|--------|----------------------------------------------------------------------|
|         | Prot.M         | Pept.M | Prot.M        | Pept.M |                                                                      |
| DIE     | 8              | 6      | 2             | 2      | Insulin-degrading enzyme                                             |
| ITGB1   | 8              | 6      | 2             | 1      | Integrin beta-1                                                      |
| LAMC1   | 6              | 6      | 1             | 1      | Laminin subunit gamma-1                                              |
| MRPL17  | 7              | 6      | 2             | 1      | 39S ribosomal protein L17, mitochondrial                             |
| NDUFS5  | 7              | 6      |               |        | NADH dehydrogenase [ubiquinone] iron-sulfur protein 5                |
| NUP210  | 8              | 6      | 1             | 1      | Nuclear pore membrane glycoprotein 210                               |
| PYCR1   | 6              | 6      | 1             | 0      | Pyrroline-5-carboxylate reductase 1, mitochondrial                   |
| REEP6   | 6              | 6      | 1             | 1      | Receptor expression-enhancing protein 6                              |
| SEPT7   | 6              | 6      | 2             | 2      | Septin-7                                                             |
| TM9SF2  | 10             | 6      | 2             | 2      | Transmembrane 9 superfamily member 2                                 |
| UBE2L3  | 6              | 6      | 2             | 2      | Ubiquitin-conjugating enzyme E2 L3                                   |
| ARPC1B  | 5              | 5      | 2             | 1      | Actin-related protein 2/3 complex subunit 1B                         |
| DPEP1   | 6              | 5      |               |        | Dipeptidase 1                                                        |
| EPHB2   | 5              | 5      | 1             | 1      | Ephrin type-B receptor 2                                             |
| ERO1A   | 8              | 5      | 1             | 1      | ERO1-like protein alpha                                              |
| FANCI   | 6              | 5      |               |        | Fanconi anemia group I protein                                       |
| HK2     | 6              | 5      | 2             | 1      | Hexokinase-2                                                         |
| HM13    | 7              | 5      |               |        | Minor histocompatibility antigen H13                                 |
| HNRNPH2 | 8              | 5      |               |        | Heterogeneous nuclear ribonucleoprotein H2                           |
| HNRNPH3 | 6              | 5      |               |        | Heterogeneous nuclear ribonucleoprotein H3                           |
| HSPB1   | 5              | 5      |               |        | Heat shock protein beta-1                                            |
| ILF2    | 5              | 5      | 1             | 1      | Interleukin enhancer-binding factor 2                                |
| LAMB1   | 8              | 5      | 1             | 1      | Laminin subunit beta-1                                               |
| LSM4    | 6              | 5      | 2             | 1      | U6 snRNA-associated Sm-like protein LSM4                             |
| MRPL19  | 6              | 5      | 2             | 1      | 39S ribosomal protein L19, mitochondrial                             |
| MRPL22  | 6              | 5      | 1             | 1      | 39S ribosomal protein L22, mitochondrial                             |
| MRPL43  | 6              | 5      | 2             | 1      | 39S ribosomal protein L43, mitochondrial                             |
| MUC13   | 5              | 5      | 1             | 1      | Mucin-13                                                             |
| NDUFS2  | 6              | 5      | 2             | 1      | NADH dehydrogenase [ubiquinone] iron-sulfur protein 2, mitochondrial |
| PCBP3   | 5              | 5      |               |        | Poly(rC)-binding protein 3                                           |
| PFN2    | 5              | 5      | 1             | 1      | Profilin-2                                                           |
| PUS7    | 5              | 5      |               |        | Pseudouridylate synthase 7 homolog                                   |
| SEC63   | 6              | 5      | 2             | 1      | Translocation protein SEC63 homolog                                  |
| SELENOF | 5              | 5      |               |        | Selenoprotein F                                                      |
| SLC35A4 | 6              | 5      |               |        | SLC35A4 upstream open reading frame protein                          |
| SRRT    | 8              | 5      | 2             | 1      | Serrate RNA effector molecule homolog                                |
| SRSF3   | 5              | 5      |               |        | Serine/arginine-rich splicing factor 3                               |
| STK26   | 7              | 5      | 1             | 1      | Serine/threonine-protein kinase 26                                   |
| DNPH1   | 4              | 4      | 1             | 1      | 2'-deoxynucleoside 5'-phosphate N-hydrolase 1                        |
| DUT     | 4              | 4      | 1             | 1      | Deoxyuridine 5'-triphosphate nucleotidohydrolase, mitochondrial      |
| FRIL    | 5              | 4      |               |        | Ferritin light chain FTL                                             |
| GFPT2   | 5              | 4      |               |        | Glutamine--fructose-6-phosphate aminotransferase [isomerizing] 2     |
| GHITM   | 4              | 4      | 1             | 1      | Growth hormone-inducible transmembrane protein                       |
| GOLGA4  | 6              | 4      | 1             | 1      | Golgin subfamily A member 4                                          |
| H2AV    | 4              | 4      |               |        | Histone H2A.V H2AFV                                                  |
| HARS    | 5              | 4      | 1             | 1      | Histidine--tRNA ligase, cytoplasmic                                  |
| HNRNPAB | 5              | 4      |               |        | Heterogeneous nuclear ribonucleoprotein A/B                          |
| ILF3    | 5              | 4      |               |        | Interleukin enhancer-binding factor 3                                |
| ITPR2   | 6              | 4      |               |        | Inositol 1,4,5-trisphosphate receptor type 2                         |
| KDM1A   | 6              | 4      |               |        | Lysine-specific histone demethylase 1A KDM1A                         |
| KRAS    | 4              | 4      |               |        | GTPase KRas                                                          |
| LCN2    | 5              | 4      | 1             | 1      | Neutrophil gelatinase-associated lipocalin                           |
| LNPEP   | 4              | 4      |               |        | Leucyl-cystinyl aminopeptidase                                       |
| MBOAT7  | 4              | 4      | 1             | 1      | Lysophospholipid acyltransferase 7                                   |
| OAT     | 5              | 4      |               |        | Ornithine aminotransferase, mitochondrial                            |
| PPM1G   | 4              | 4      | 1             | 1      | Protein phosphatase 1G                                               |
| PRPS1   | 5              | 4      |               |        | Ribose-phosphate pyrophosphokinase 1                                 |

Table S2A cont.

| Synonym | SW948-wt cells |        | -cld7kd cells |        | Protein Description                                                 |
|---------|----------------|--------|---------------|--------|---------------------------------------------------------------------|
|         | Prot.M         | Pept.M | Prot.M        | Pept.M |                                                                     |
| PTCD3   | 4              | 4      | 1             | 1      | Pentatricopeptide repeat domain-containing protein 3, mitochondrial |
| RAB25   | 4              | 4      |               |        | Ras-related protein Rab-25                                          |
| SPTBN2  | 11             | 4      |               |        | Spectrin beta chain, non-erythrocytic 2                             |
| SRSF1   | 4              | 4      |               |        | Serine/arginine-rich splicing factor 1                              |
| TMED3   | 4              | 4      |               |        | Transmembrane emp24 domain-containing protein 3                     |
| TRIP11  | 5              | 4      |               |        | Thyroid receptor-interacting protein 11                             |
| WFS1    | 5              | 4      | 1             | 1      | Wolframin                                                           |
| ABCC3   | 4              | 3      |               |        | Canalicular multispecific organic anion transporter 2               |
| ACTR1A  | 3              | 3      |               |        | Alpha-centractin                                                    |
| ADD1    | 4              | 3      |               |        | Alpha-adducin                                                       |
| ARL8A   | 4              | 3      |               |        | ADP-ribosylation factor-like protein 8A                             |
| ATXN10  | 3              | 3      |               |        | Ataxin-10                                                           |
| CSKP    | 3              | 3      |               |        | Peripheral plasma membrane protein CASK CASK                        |
| CYP51A1 | 6              | 3      |               |        | Lanosterol 14-alpha demethylase                                     |
| ERH     | 3              | 3      |               |        | Enhancer of rudimentary homolog                                     |
| ERMP1   | 4              | 3      |               |        | Endoplasmic reticulum metallopeptidase 1                            |
| FSCN1   | 4              | 3      |               |        | Fascin                                                              |
| HMGCS1  | 3              | 3      |               |        | Hydroxymethylglutaryl-CoA synthase, cytoplasmic                     |
| HNRNPA0 | 4              | 3      |               |        | Heterogeneous nuclear ribonucleoprotein A0                          |
| HNRNPDL | 3              | 3      |               |        | Heterogeneous nuclear ribonucleoprotein D-like                      |
| LSM1    | 3              | 3      |               |        | U6 snRNA-associated Sm-like protein LSm1                            |
| MRPL28  | 4              | 3      |               |        | 39S ribosomal protein L28, mitochondrial                            |
| PEA-15  | 3              | 3      |               |        | Astrocytic phosphoprotein                                           |
| POLR2B  | 3              | 3      |               |        | DNA-directed RNA polymerase II subunit RPB2                         |
| PTDSS1  | 4              | 3      |               |        | Phosphatidylserine synthase 1                                       |
| RAB6B   | 5              | 3      |               |        | Ras-related protein Rab-6B                                          |
| RBBP9   | 4              | 3      |               |        | Putative hydrolase RBBP9                                            |
| RBMX    | 3              | 3      |               |        | RNA-binding motif protein, X chromosome                             |
| RHOB    | 4              | 3      |               |        | Rho-related GTP-binding protein RhoB                                |
| SAFB    | 5              | 3      |               |        | Scaffold attachment factor B1                                       |
| SELH    | 3              | 3      |               |        | Selenoprotein H                                                     |
| SLC16A3 | 4              | 3      |               |        | Monocarboxylate transporter 4                                       |
| SNX2    | 3              | 3      |               |        | Sorting nexin-2                                                     |
| TRA2B   | 3              | 3      |               |        | Transformer-2 protein homolog beta                                  |
| TROVE2  | 3              | 3      |               |        | 60 kDa SS-A/Ro ribonucleoprotein                                    |

Table S2B

## Higher recovery of proteins in SW948-cld7kd than -wt cells

| Synonym  | SW948-wt cells |        | -cld7kd cells |        | Protein Description                                                     |
|----------|----------------|--------|---------------|--------|-------------------------------------------------------------------------|
|          | Prot.M         | Pept.M | Prot.M        | Pept.M |                                                                         |
| AHNAK    | 21             | 14     | 84            | 83     | Neuroblast differentiation-associated protein AHNAK                     |
| CNOT1    | 3              | 2      | 14            | 14     | CCR4-NOT transcription complex subunit 1                                |
| ECM29    | 9              | 6      | 19            | 19     | Proteasome-associated protein ECM29 homolog                             |
| IQGAP2   |                |        | 13            | 13     | Ras GTPase-activating-like protein IQGAP2                               |
| PA2G4    | 7              | 5      | 11            | 13     | Proliferation-associated protein 2G4                                    |
| ACTN2    |                |        | 11            | 12     | Alpha-actinin-2                                                         |
| PSAT1    | 5              | 5      | 11            | 12     | Phosphoserine aminotransferase                                          |
| ATP5EP2  | 3              | 2      | 10            | 10     | ATP synthase subunit epsilon-like protein, mitochondrial                |
| DNAJC13  |                |        | 9             | 10     | DnaJ homolog subfamily C member 13                                      |
| DNM2     | 6              | 3      | 8             | 9      | Dynammin-2                                                              |
| OSBP     | 5              | 4      | 9             | 9      | Oxysterol-binding protein 1                                             |
| RL7      | 1              | 1      | 9             | 9      | 60S ribosomal protein L7 RPL7                                           |
| HSPA1L   |                |        | 9             | 9      | Heat shock 70 kDa protein 1-like                                        |
| KRT4     | 6              | 4      | 9             | 9      | Keratin, type II cytoskeletal 4                                         |
| EIF3L    | 3              | 2      | 9             | 8      | Eukaryotic translation initiation factor 3 subunit L                    |
| TLN2     |                |        | 7             | 8      | Talin-2                                                                 |
| PFAS     | 5              | 3      | 8             | 8      | Phosphoribosylformylglycinamide synthase                                |
| ANXA11   | 3              | 2      | 7             | 7      | Annexin A11                                                             |
| KRT14    |                |        | 7             | 7      | Keratin, type I cytoskeletal 14                                         |
| PC       | 3              | 2      | 7             | 7      | Pyruvate carboxylase, mitochondrial                                     |
| EIF3M    | 4              | 3      | 6             | 7      | Eukaryotic translation initiation factor 3 subunit M                    |
| LTA4H    | 4              | 3      | 6             | 7      | Leukotriene A-4 hydrolase                                               |
| EIF3I    | 6              | 2      | 7             | 7      | Eukaryotic translation initiation factor 3 subunit I                    |
| LAP2A    | 2              | 1      | 6             | 7      | Lamina-associated polypeptide 2, isoform alpha                          |
| PAK1     |                |        | 6             | 7      | Serine/threonine-protein kinase PAK 1                                   |
| PPP2CA   | 5              | 3      | 6             | 7      | Serine/threonine-protein phosphatase 2A catalytic subunit alpha isoform |
| AP3B1    | 5              | 3      | 7             | 6      | AP-3 complex subunit beta-1                                             |
| ASS1     |                |        | 6             | 6      | Argininosuccinate synthase                                              |
| CUL1     | 2              | 2      | 6             | 6      | Cullin-1                                                                |
| CUL3     | 2              | 1      | 6             | 6      | Cullin-3                                                                |
| IPO4     | 4              | 2      | 5             | 6      | Importin-4                                                              |
| KIF13B   | 6              | 3      | 5             | 6      | Kinesin-like protein KIF13B                                             |
| NANS     | 3              | 3      | 6             | 6      | Sialic acid synthase                                                    |
| POF1B    | 2              | 1      | 5             | 6      | Protein POF1B                                                           |
| RPS11    | 6              | 3      | 6             | 6      | 40S ribosomal protein S11                                               |
| RPS3A    | 2              | 2      | 6             | 6      | 40S ribosomal protein S3a                                               |
| RPS4X    | 5              | 3      | 6             | 6      | 40S ribosomal protein S4, X isoform                                     |
| TKFC     | 3              | 3      | 5             | 6      | Triokinase/FMN cyclase                                                  |
| UBR5     | 1              | 1      | 6             | 6      | E3 ubiquitin-protein ligase UBR5                                        |
| ABCE1    | 4              | 2      | 6             | 5      | ATP-binding cassette sub-family E member 1                              |
| AKR1A1   | 2              | 2      | 5             | 5      | Alcohol dehydrogenase [NADP(+)]                                         |
| COASY    | 3              | 2      | 5             | 5      | Bifunctional coenzyme A synthase                                        |
| FUBP3    | 3              | 2      | 5             | 5      | Far upstream element-binding protein 3                                  |
| NAP1L4   | 4              | 2      | 5             | 5      | Nucleosome assembly protein 1-like 4                                    |
| PDLIM1   | 2              | 1      | 5             | 5      | PDZ and LIM domain protein 1                                            |
| PYCR2    | 2              | 2      | 5             | 5      | Proline-5-carboxylate reductase 2                                       |
| RPA1     |                |        | 6             | 5      | Ribose-5-phosphate isomerase                                            |
| RPL10    |                |        | 5             | 5      | 60S ribosomal protein L10                                               |
| RPL10A   | 1              | 1      | 6             | 5      | 60S ribosomal protein L10a                                              |
| RPL23A   | 2              | 1      | 5             | 5      | 60S ribosomal protein L23a                                              |
| RPL6     |                |        | 6             | 5      | 60S ribosomal protein L6                                                |
| PPP1CB   |                |        | 5             | 5      | Serine/threonine-protein phosphatase PP1-beta catalytic subunit         |
| TXNL1    | 2              | 2      | 5             | 5      | Thioredoxin-like protein 1                                              |
| UBE2O    |                |        | 6             | 5      | (E3-independent) E2 ubiquitin-conjugating enzyme                        |
| ACSL3    | 4              | 2      | 4             | 5      | Long-chain-fatty-acid--CoA ligase 3                                     |
| ADH5     | 2              | 1      | 6             | 5      | Alcohol dehydrogenase class-3                                           |
| AIP      | 2              | 1      | 4             | 5      | AH receptor-interacting protein                                         |
| APEX1    | 4              | 1      | 6             | 5      | DNA-(apurinic or apyrimidinic site) lyase                               |
| C12orf10 |                |        | 4             | 5      | Chromosome C12 orf10                                                    |
| DDAH2    | 1              | 1      | 4             | 5      | N(G),N(G)-dimethylarginine dimethylaminohydrolase 2                     |
| LAP2B    | 3              | 2      | 4             | 5      | Lamina-associated polypeptide 2, isoforms beta/gamma                    |
| POTEF    |                |        | 5             | 5      | POTE ankyrin domain family member F                                     |

Table S2B cont.

| Synonym   | SW948-wt cells |        | -cld7kd cells |        | Protein Description                                              |
|-----------|----------------|--------|---------------|--------|------------------------------------------------------------------|
|           | Prot.M         | Pept.M | Prot.M        | Pept.M |                                                                  |
| RPL26     |                |        | 5             | 5      | 60S ribosomal protein L26                                        |
| RPL4      |                |        | 4             | 5      | 60S ribosomal protein L4                                         |
| USP47     |                |        | 6             | 5      | Ubiquitin carboxyl-terminal hydrolase 47                         |
| WARS      | 3              | 2      | 4             | 5      | Tryptophan--tRNA ligase, cytoplasmic                             |
| CNN2      |                |        | 5             | 4      | Calponin-2                                                       |
| DNAJB1    | 1              | 1      | 4             | 4      | DnaJ homolog subfamily B member 1                                |
| EIF3E     |                |        | 4             | 4      | Eukaryotic translation initiation factor 3 subunit E             |
| FAM120A   |                |        | 5             | 4      | Constitutive coactivator of PPAR-gamma-like protein 1            |
| GRHPR     |                |        | 3             | 4      | Glyoxylate reductase/hydroxypyruvate reductase                   |
| HDHD3     |                |        | 4             | 4      | Haloacid dehalogenase-like hydrolase domain-containing protein 3 |
| RAD23B    |                |        | 3             | 4      | UV excision repair protein RAD23 homolog B                       |
| RPL18A    |                |        | 3             | 4      | 60S ribosomal protein L18a                                       |
| RPL30     | 2              | 1      | 3             | 4      | 60S ribosomal protein L30                                        |
| RPL7A     |                |        | 5             | 4      | 60S ribosomal protein L7a                                        |
| RPL9      |                |        | 3             | 4      | 60S ribosomal protein L9                                         |
| SPRYD4    | 2              | 1      | 3             | 4      | SPRY domain-containing protein 4                                 |
| AK1       |                |        | 3             | 3      | Adenylate kinase isoenzyme 1                                     |
| ALDOC     |                |        | 3             | 3      | Fructose-bisphosphate aldolase C                                 |
| GAPVD1    |                |        | 3             | 3      | GTPase-activating protein and VPS9 domain-containing protein 1   |
| HSPA4L    |                |        | 3             | 3      | Heat shock 70 kDa protein 4L                                     |
| KRT77     |                |        | 3             | 3      | Keratin, type II cytoskeletal 1b                                 |
| NTMT1     |                |        | 3             | 3      | N-terminal Xaa-Pro-Lys N-methyltransferase 1                     |
| PPP2R1B   |                |        | 3             | 3      | Serine/threonine-protein phosphatase subunit A beta              |
| PYGL      |                |        | 3             | 3      | Glycogen phosphorylase, liver form                               |
| RPL13     |                |        | 3             | 3      | 60S ribosomal protein L13                                        |
| RPL13A    |                |        | 3             | 3      | 60S ribosomal protein L13a                                       |
| RPL15     |                |        | 3             | 3      | 60S ribosomal protein L15                                        |
| RPL36A    |                |        | 3             | 3      | 60S ribosomal protein L36a                                       |
| RPL36L    |                |        | 3             | 3      | 60S ribosomal protein L36a-like                                  |
| SEC13     |                |        | 3             | 3      | Protein SEC13 homolog                                            |
| A2M       |                |        | 3             | 3      | Alpha-2-macroglobulin                                            |
| ANKFY1    |                |        | 3             | 3      | Rabankyrin-5                                                     |
| ANXA7     |                |        | 2             | 3      | Annexin A7                                                       |
| C9orf64   |                |        | 2             | 3      | UPF0553 protein C9orf64                                          |
| CKB       |                |        | 2             | 3      | Creatine kinase B-type                                           |
| DCTD      |                |        | 3             | 3      | Deoxycytidylate deaminase                                        |
| DYNLL2    |                |        | 3             | 3      | Dynein light chain 2, cytoplasmic                                |
| EFL1      |                |        | 3             | 3      | Elongation factor-like GTPase 1                                  |
| GDA       |                |        | 2             | 3      | Guanine deaminase                                                |
| HSPB11    |                |        | 2             | 3      | Intraflagellar transport protein 25 homolog                      |
| MAP2K1    |                |        | 2             | 3      | Dual specificity mitogen-activated protein kinase kinase 1       |
| NIPSNAP3A |                |        | 3             | 3      | Protein NipSnap homolog 3A                                       |
| PDAP1     |                |        | 2             | 3      | 28 kDa heat- and acid-stable phosphoprotein                      |
| PDCD4     |                |        | 2             | 3      | Programmed cell death protein 4                                  |
| PEPD      |                |        | 3             | 3      | Xaa-Pro dipeptidase                                              |
| PTBP3     |                |        | 2             | 3      | Polypyrimidine tract-binding protein 3                           |
| RPL14     |                |        | 2             | 3      | 60S ribosomal protein L14                                        |
| RPL28     |                |        | 3             | 3      | 60S ribosomal protein L28                                        |
| RPL3      |                |        | 2             | 3      | 60S ribosomal protein L3                                         |
| RPL34     |                |        | 3             | 3      | 60S ribosomal protein L34                                        |
| RPL35A    |                |        | 3             | 3      | 60S ribosomal protein L35a                                       |
| RPL36     |                |        | 2             | 3      | 60S ribosomal protein L36                                        |
| RPL37A    |                |        | 3             | 3      | 60S ribosomal protein L37a                                       |
| RPLP2     |                |        | 2             | 3      | 60S acidic ribosomal protein P2                                  |
| STXBP2    |                |        | 3             | 3      | Syntaxin-binding protein 2                                       |
| TCERG1    |                |        | 3             | 3      | Transcription elongation regulator 1                             |



Table S2C

## Higher recovery of proteins in SW948-wt than SW948-cld7kd TEX

| Synonym  | SW948-wt TEX |        | -clد7kd TEX |        | Protein Description                                                |
|----------|--------------|--------|-------------|--------|--------------------------------------------------------------------|
|          | Prot.M       | Pept.M | Prot.M      | Pept.M |                                                                    |
| ADA      | 5            | 3      |             |        | Adenosine deaminase                                                |
| AKR1C3   | 15           | 5      |             |        | Aldo-keto reductase family 1 member C3                             |
| ANXA6    | 15           | 7      | 6           | 3      | Annexin A6                                                         |
| AOC1     | 20           | 12     | 8           | 5      | Amiloride-sensitive amine oxidase                                  |
| ACTR1B   | 16           | 6      | 7           | 3      | Beta-centractin                                                    |
| APEH     | 7            | 3      |             |        | Acylamino-acid-releasing enzyme                                    |
| ARPC1B   | 8            | 4      |             |        | Actin-related protein 2/3 complex subunit 1B                       |
| ATP6V1B2 | 9            | 4      |             |        | V-type proton ATPase subunit B, brain isoform                      |
| CAPN1    | 6            | 4      |             |        | Calpain-1 catalytic subunit                                        |
| COPS5    | 12           | 8      | 8           | 4      | COP9 signalosome complex subunit 5                                 |
| CSNK2B   | 6            | 4      | 1           | 1      | Casein kinase II subunit beta                                      |
| DDX39B   | 6            | 3      |             |        | Spliceosome RNA helicase DDX39B                                    |
| EIF4E2   | 6            | 3      |             |        | Eukaryotic translation initiation factor 4E type 2                 |
| EPS8L3   | 49           | 15     | 4           | 3      | Epidermal growth factor receptor kinase substrate 8-like protein 3 |
| GC       | 13           | 6      | 8           | 3      | Vitamin D-binding protein                                          |
| GLB1     | 31           | 6      | 6           | 3      | Beta-galactosidase                                                 |
| GLG1     | 8            | 5      | 4           | 2      | Golgi apparatus protein 1                                          |
| GSN      | 10           | 6      | 5           | 2      | Gelsolin                                                           |
| GSS      | 11           | 7      | 4           | 3      | Glutathione synthetase                                             |
| H2AFY    | 17           | 6      | 2           | 1      | Core histone macro-H2A.1                                           |
| HSD17B4  | 10           | 6      | 1           | 1      | Peroxisomal multifunctional enzyme type 2                          |
| HSPA4    | 10           | 7      | 10          | 3      | Heat shock 70 kDa protein 4                                        |
| IGF2R    | 42           | 25     | 19          | 12     | Cation-independent mannose-6-phosphate receptor                    |
| KRT19    | 16           | 6      | 10          | 3      | Keratin, type I cytoskeletal 19                                    |
| MCM2     | 3            | 3      |             |        | DNA replication licensing factor MCM2                              |
| NAGLU    | 6            | 4      | 1           | 1      | Alpha-N-acetylglucosaminidase                                      |
| NARS     | 17           | 10     | 6           | 3      | Asparagine--tRNA ligase                                            |
| NEU1     | 10           | 4      |             |        | Sialidase-1                                                        |
| NMT1     | 6            | 4      |             |        | Glycylpeptide N-tetradecanoyltransferase 1                         |
| NONO     | 8            | 4      |             |        | Non-POU domain-containing octamer-binding protein                  |
| OLFM4    | 8            | 6      |             |        | Olfactomedin-4                                                     |
| PAICS    | 18           | 10     | 10          | 5      | Multifunctional protein ADE2                                       |
| PARP4    | 15           | 8      | 2           | 1      | Poly [ADP-ribose] polymerase 4                                     |
| PDXK     | 5            | 4      | 2           | 1      | Pyridoxal kinase                                                   |
| PGM1     | 5            | 3      |             |        | Phosphoglucomutase-1                                               |
| PPP2CA   | 10           | 5      | 4           | 2      | Serine/threonine-protein phosphatase 2A alpha                      |
| PSME1    | 9            | 4      | 1           | 1      | Proteasome activator complex subunit 1                             |
| PYGL     | 26           | 7      |             |        | Glycogen phosphorylase, liver form                                 |
| QSOX1    | 45           | 11     | 15          | 3      | Sulfhydryl oxidase 1                                               |
| RAB6B    | 50           | 6      |             |        | Ras-related protein Rab-6B                                         |
| RDX      | 82           | 10     |             |        | Radixin                                                            |
| RNPEP    | 13           | 6      | 4           | 3      | Aminopeptidase B                                                   |
| RPS27A   | 315          | 7      | 3           | 1      | Ubiquitin-40S ribosomal protein S27a                               |
| TARS     | 10           | 7      | 2           | 2      | Valine--tRNA ligase                                                |
| TSTA3    | 18           | 5      | 2           | 1      | GDP-L-fucose synthase                                              |
| TUBA1A   | 160          | 16     |             |        | Tubulin alpha-1A chain                                             |
| TUBB2A   | 90           | 15     |             |        | Tubulin beta-2A chain                                              |
| UBE2V1   | 6            | 4      |             |        | Ubiquitin-conjugating enzyme E2 variant 1                          |
| XPO1     | 43           | 21     | 22          | 10     | Exportin-1                                                         |

Table S2D

## Higher recovery of proteins in SW948-cld7kd TEX than SW948-wt TEX

| Synonym | SW948-wt TEX |        | -cld7kd TEX |        | Protein Description                                        |
|---------|--------------|--------|-------------|--------|------------------------------------------------------------|
|         | Prot.M       | Pept.M | Prot.M      | Pept.M |                                                            |
| AARS    |              |        | 5           | 3      | Alanine--tRNA ligase                                       |
| ACE     |              |        | 5           | 3      | Angiotensin-converting enzyme                              |
| ACP2    | 8            | 3      | 11          | 6      | Lysosomal acid phosphatase                                 |
| AP2B1   | 12           | 2      | 49          | 16     | AP-2 complex subunit beta                                  |
| AREG    | 7            | 1      | 26          | 4      | Amphiregulin                                               |
| ATP1A3  |              |        | 118         | 15     | Sodium/potassium-transporting ATPase subunit alpha-3       |
| ATP2B4  |              |        | 13          | 3      | Plasma membrane calcium-transporting ATPase 4              |
| BET1L   |              |        | 7           | 4      | BET1-like protein                                          |
| BMP4    |              |        | 7           | 4      | Bone morphogenetic protein 4                               |
| BMP7    |              |        | 9           | 4      | Bone morphogenetic protein 7                               |
| CAPN5   | 9            | 4      | 56          | 13     | Calpain-5                                                  |
| CASK    | 26           | 8      | 102         | 25     | Peripheral plasma membrane protein CASK                    |
| CD166   | 8            | 4      | 30          | 12     | CD166 antigen                                              |
| CD276   |              |        | 7           | 4      | CD276 antigen                                              |
| CD97    | 3            | 2      | 15          | 7      | CD97 antigen                                               |
| CHMP2B  | 2            | 1      | 9           | 4      | Charged multivesicular body protein 2b                     |
| CLDN1   |              |        | 8           | 3      | Claudin domain-containing protein 1                        |
| CTNND1  | 4            | 1      | 39          | 13     | Catenin delta-1                                            |
| DIP2A   |              |        | 24          | 9      | Disco-interacting protein 2 homolog A                      |
| DIP2C   |              |        | 17          | 3      | Disco-interacting protein 2 homolog C                      |
| DLG1    | 14           | 6      | 32          | 13     | Disks large homolog 1                                      |
| DNM1L   |              |        | 8           | 3      | Dynamin-1-like protein                                     |
| DPP7    |              |        | 7           | 3      | Dipeptidyl peptidase 2                                     |
| DYNLT1  | 1            | 1      | 6           | 4      | Dynein light chain Tctex-type 1                            |
| EIF1AX  | 4            | 2      | 18          | 7      | Eukaryotic translation initiation factor 1A, X-chromosomal |
| EPB41L1 | 2            | 1      | 7           | 4      | Band 4.1-like protein 1                                    |
| EPHA2   | 28           | 4      | 77          | 15     | Ephrin type-A receptor 2                                   |
| EPHB4   |              |        | 60          | 7      | Ephrin type-B receptor 4                                   |
| EPRS    | 3            | 3      | 9           | 6      | Bifunctional glutamate/proline--tRNA ligase                |
| FARP1   | 4            | 1      | 28          | 12     | FERM, RhoGEF and pleckstrin domain-containing protein 1    |
| FARP2   |              |        | 6           | 4      | FERM, RhoGEF and pleckstrin domain-containing protein 2    |
| FKBP4   | 6            | 3      | 14          | 6      | Peptidyl-prolyl cis-trans isomerase FKBP4                  |
| FLNA    |              |        | 5           | 3      | Filamin-A                                                  |
| GGH     | 3            | 2      | 10          | 6      | Gamma-glutamyl hydrolase                                   |
| GNA11   | 1            | 1      | 10          | 4      | Guanine nucleotide-binding protein subunit alpha-11        |
| HEPH    | 2            | 1      | 13          | 4      | Hephaestin                                                 |
| HRSP12  |              |        | 7           | 4      | Ribonuclease UK114                                         |
| ITGB5   | 24           | 9      | 49          | 21     | Integrin beta-5                                            |
| KRT14   |              |        | 16          | 6      | Keratin, type I cytoskeletal 14                            |
| KRT6A   |              |        | 25          | 6      | Keratin, type II cytoskeletal 6A                           |
| KRT77   |              |        | 27          | 3      | Keratin, type II cytoskeletal 1b                           |
| LIPH    | 7            | 4      | 12          | 8      | Lipase member H                                            |
| LRRC57  |              |        | 3           | 3      | Leucine-rich repeat-containing protein 57                  |
| LY75    | 5            | 3      | 19          | 9      | Lymphocyte antigen 75                                      |
| MAN2B1  |              |        | 5           | 3      | Lysosomal alpha-mannosidase                                |
| MAP4K4  |              |        | 67          | 11     | Mitogen-activated protein kinase kinase kinase kinase 4    |
| MET     | 4            | 3      | 12          | 6      | Hepatocyte growth factor receptor                          |
| MINK1   | 28           | 9      | 115         | 22     | Misshapen-like kinase 1                                    |
| MVB12A  | 8            | 4      | 24          | 8      | Multivesicular body subunit 12A                            |
| MVB12B  | 12           | 5      | 64          | 13     | Multivesicular body subunit 12B                            |
| MYOF    |              |        | 6           | 4      | Myoferlin                                                  |
| NCBP1   |              |        | 5           | 3      | Nuclear cap-binding protein subunit 1                      |
| PA2G4   | 15           | 3      | 22          | 6      | Proliferation-associated protein 2G4                       |
| PKP3    | 11           | 4      | 50          | 11     | Plakophilin-3                                              |
| PLAUR   | 3            | 2      | 9           | 5      | Urokinase plasminogen activator surface receptor           |
| PLXNB2  | 7            | 3      | 22          | 13     | Plexin-B2                                                  |
| POTEF   |              |        | 118         | 6      | POTE ankyrin domain family member F                        |

Table S2D cont.

| Synonym  | SW948-wt TEX |        | -cld7kd TEX |        | Protein Description                                        |
|----------|--------------|--------|-------------|--------|------------------------------------------------------------|
|          | Prot.M       | Pept.M | Prot.M      | Pept.M |                                                            |
| PRPF19   | 8            | 2      | 15          | 5      | Pre-mRNA-processing factor 19                              |
| PRSS23   | 4            | 3      | 30          | 8      | Serine protease 23                                         |
| PSAT1    | 1            | 1      | 6           | 4      | Phosphoserine aminotransferase                             |
| PSMC2    | 1            | 1      | 8           | 5      | 26S protease regulatory subunit 7                          |
| PSMD5    |              |        | 4           | 3      | 26S proteasome non-ATPase regulatory subunit 5             |
| PTP4A2   |              |        | 8           | 5      | Protein tyrosine phosphatase type IVA 2                    |
| PTPRA    |              |        | 3           | 3      | Receptor-type tyrosine-protein phosphatase alpha           |
| PTPRF    | 20           | 13     | 69          | 29     | Receptor-type tyrosine-protein phosphatase F               |
| RAP2A    | 23           | 6      | 57          | 13     | Ras-related protein Rap-2a                                 |
| RHOF     |              |        | 5           | 3      | Rho-related GTP-binding protein RhoF                       |
| RHOG     | 10           | 4      | 20          | 9      | Rho-related GTP-binding protein RhoG                       |
| ROR1     |              |        | 9           | 3      | Inact. tyrosine-protein kinase transmembrane receptor ROR1 |
| RPL35A   |              |        | 8           | 4      | 60S ribosomal protein L35a                                 |
| RPS17    | 2            | 1      | 8           | 4      | 40S ribosomal protein S17                                  |
| SARS     | 8            | 3      | 8           | 6      | Serine--tRNA ligase, cytoplasmic                           |
| SDF4     |              |        | 6           | 3      | 45 kDa calcium-binding protein                             |
| SERPINB6 | 5            | 4      | 20          | 8      | Serpin B6                                                  |
| SLC43A1  |              |        | 15          | 3      | Large neutral amino acids transporter small subunit 3      |
| ST14     | 39           | 9      | 81          | 19     | Suppressor of tumorigenicity 14 protein                    |
| TLN1     |              |        | 9           | 7      | Talin-1                                                    |
| TMEM2    | 4            | 2      | 17          | 10     | Transmembrane protein 2                                    |
| TNIK     | 31           | 10     | 108         | 22     | TRAF2 and NCK-interacting protein kinase                   |
| TSPAN3   | 7            | 1      | 27          | 4      | Tetraspanin-3                                              |
| TUBA1C   |              |        | 124         | 16     | Tubulin alpha-1C chain                                     |
| UBB      |              |        | 423         | 9      | Polyubiquitin-B                                            |
| UBE2V2   |              |        | 10          | 5      | Ubiquitin-conjugating enzyme E2 variant 2                  |
| UEVLD    | 5            | 3      | 16          | 8      | Ubiquitin-conjugating enzyme E2 variant 3                  |
| VPS36    |              |        | 7           | 6      | Vacuolar protein-sorting-associated protein 36             |
| ZDHHC5   |              |        | 4           | 3      | Palmitoyltransferase ZDHHC5                                |

Table S2E

**Higher protein recovery in SW948-wt TEX than SW948-wt and -cld7kd cells**

| Synonym  | SW948-wt cells |        | -cld7kd cells |        | SW948-wt TEX |        | Protein Description                                            |
|----------|----------------|--------|---------------|--------|--------------|--------|----------------------------------------------------------------|
|          | Prot M         | Pept M | Prot M        | Pept M | Prot M       | Pept M |                                                                |
| A2MG     |                |        | 12            | 4      | 96           | 8      | Alpha-2-macroglobulin                                          |
| ACTL6A   | 4              | 2      | 4             | 2      | 9            | 5      | Actin-like protein 6A                                          |
| ACTR1B   |                |        |               |        | 16           | 6      | Beta-centractin                                                |
| ADAM10   |                |        |               |        | 199          | 21     | Disintegrin and metalloproteinase domain-containing prot.10    |
| ADAM9    |                |        |               |        | 15           | 8      | Disintegrin and metalloproteinase domain-containing prot.9     |
| ANXA6    |                |        |               |        | 15           | 7      | Annexin A6                                                     |
| AOC1     |                |        |               |        | 20           | 12     | Amiloride-sensitive amine oxidase                              |
| AP2A2    |                |        |               |        | 11           | 5      | AP-2 complex subunit alpha-2                                   |
| AP2M1    |                |        |               |        | 16           | 9      | AP-2 complex subunit mu                                        |
| APOB     |                |        |               |        | 75           | 13     | Apolipoprotein B-100                                           |
| ARRDC1   |                |        |               |        | 115          | 10     | Arrestin domain-containing protein 1                           |
| ATP1B1   | 4              | 2      | 4             | 1      | 27           | 7      | Sodium/potassium-transporting ATPase subunit beta-1            |
| ATP6AP2  |                |        |               |        | 10           | 6      | Renin receptor                                                 |
| ATP6V0D1 |                |        |               |        | 18           | 9      | V-type proton ATPase subunit d 1                               |
| ATP6V1D  |                |        |               |        | 22           | 7      | V-type proton ATPase subunit D                                 |
| BROX     |                |        |               |        | 20           | 10     | BRO1 domain-containing protein BROX                            |
| CASK     | 4              | 3      |               |        | 26           | 8      | Peripheral plasma membrane protein CASK                        |
| CD55     |                |        |               |        | 27           | 9      | Complement decay-accelerating factor                           |
| CD63     | 3              | 2      | 1             | 1      | 135          | 9      | CD63 antigen                                                   |
| CD81     | 22             | 4      | 15            | 3      | 380          | 8      | CD81 antigen                                                   |
| CD82     |                |        |               |        | 12           | 5      | CD82 antigen                                                   |
| CD9      | 10             | 3      | 9             | 2      | 199          | 8      | CD9 antigen                                                    |
| CEMIP    |                |        |               |        | 48           | 23     | Cell migration-inducing and hyaluronan-binding protein         |
| CHMP1B   |                |        |               |        | 13           | 6      | Charged multivesicular body protein 1b                         |
| CHMP2A   |                |        | 1             | 1      | 28           | 8      | Charged multivesicular body protein 2a                         |
| CIB1     |                |        |               |        | 24           | 10     | Calcium and integrin-binding protein 1                         |
| CLD2     | 2              | 1      |               |        | 33           | 5      | Claudin-2                                                      |
| CLDN3    | 10             | 3      | 5             | 3      | 97           | 6      | Claudin-3                                                      |
| CLU      |                |        |               |        | 13           | 5      | Clusterin                                                      |
| CO3      |                |        |               |        | 108          | 12     | Complement C3                                                  |
| COPS4    |                |        | 2             | 2      | 12           | 7      | COP9 signalosome complex subunit 4                             |
| COPS5    | 2              | 1      | 4             | 2      | 12           | 8      | COP9 signalosome complex subunit 5                             |
| CSNK1A1  |                |        |               |        | 10           | 6      | Casein kinase I isoform alpha                                  |
| CXADR    |                |        |               |        | 27           | 10     | Coxsackievirus and adenovirus receptor                         |
| DIP2B    |                |        |               |        | 196          | 44     | Disco-interacting protein 2 homolog B                          |
| DLG1     | 2              | 1      |               |        | 14           | 6      | Disks large homolog 1                                          |
| DNAJA1   | 2              | 2      | 4             | 3      | 12           | 7      | Dnaj homolog subfamily A member 1                              |
| DPP4     | 4              | 2      | 1             | 1      | 93           | 31     | Dipeptidyl peptidase 4                                         |
| DSG2     | 1              | 1      | 3             | 2      | 116          | 24     | Desmoglein-2                                                   |
| EFNB1    |                |        |               |        | 28           | 6      | Ephrin-B1                                                      |
| EFNB2    |                |        |               |        | 21           | 6      | Ephrin-B2                                                      |
| EHD1     | 4              | 3      | 3             | 2      | 40           | 21     | EH domain-containing protein 1                                 |
| EHD4     |                |        | 4             | 3      | 37           | 17     | EH domain-containing protein 4                                 |
| EPCAM    | 35             | 7      | 36            | 7      | 288          | 14     | Epithelial cell adhesion molecule                              |
| EPHB2    | 7              | 5      | 2             | 1      | 59           | 16     | Ephrin type-B receptor 2                                       |
| EPHB3    |                |        |               |        | 48           | 12     | Ephrin type-B receptor 3                                       |
| EPS8L3   |                |        | 2             | 2      | 49           | 15     | Epidermal growth factor receptor kinase substrate 8 3          |
| F2       |                |        |               |        | 32           | 7      | Prothrombin                                                    |
| FA5      |                |        |               |        | 23           | 5      | Coagulation factor V                                           |
| FAT1     | 23             | 12     | 8             | 7      | 86           | 27     | Protocadherin Fat 1                                            |
| FPRP     |                |        |               |        | 365          | 43     | Prostaglandin F2 receptor negative regulator                   |
| FTL      | 6              | 4      | 2             | 1      | 42           | 9      | Ferritin light chain                                           |
| FYN      |                |        |               |        | 15           | 5      | Tyrosine-protein kinase Fyn                                    |
| GAA      | 2              | 1      | 2             | 2      | 43           | 11     | Lysosomal alpha-glucosidase                                    |
| GLB1     |                |        | 4             | 2      | 31           | 6      | Beta-galactosidase                                             |
| GNAI3    |                |        |               |        | 24           | 5      | Guanine nucleotide-binding protein G(k) subunit alpha          |
| GNAS     | 4              | 2      | 1             | 1      | 19           | 6      | Guanine nucleotide-binding protein G(s) subunit alpha XLas     |
| GNB1     | 3              | 1      | 6             | 4      | 33           | 12     | Guanine nucleotide-binding protein G(i)/G(s)/G(t) subu. beta1  |
| GNB2     |                |        | 4             | 3      | 34           | 11     | Guanine nucleotide-binding protein G(i)/G(s)/G(t) subu. beta-2 |
| GNB4     | 3              | 1      |               |        | 14           | 5      | Guanine nucleotide-binding protein subunit beta-4              |
| GOLGA7   | 2              | 1      | 1             | 1      | 20           | 5      | Golgin subfamily A member 7                                    |

Table S2E cont.

| Synonym   | SW948-wt cells |        | -cld7kd cells |        | SW948-wt TEX |        | Protein Description                                     |
|-----------|----------------|--------|---------------|--------|--------------|--------|---------------------------------------------------------|
|           | Prot M         | Pept M | Prot M        | Pept M | Prot M       | Pept M |                                                         |
| GPA33     | 4              | 2      | 4             | 2      | 80           | 10     | Cell surface A33 antigen                                |
| GPRC5A    |                |        |               |        | 33           | 5      | Retinoic acid-induced protein 3                         |
| GPRC5C    |                |        |               |        | 16           | 5      | G-protein coupled receptor family C group 5 member C    |
| H2AFY     |                |        |               |        | 17           | 6      | Core histone macro-H2A.1                                |
| HIST1H2BB | 28             | 3      | 18            | 3      | 103          | 6      | Histone H2B type 1-B                                    |
| HIST1H2BC | 29             | 3      | 20            | 3      | 110          | 7      | Histone H2B type 1-C/E/F/G/I                            |
| HIST3H3   | 8              | 2      | 9             | 3      | 60           | 6      | Histone H3.1t                                           |
| IGSF3     |                |        |               |        | 34           | 18     | Immunoglobulin superfamily member 3                     |
| IGSF8     |                |        |               |        | 117          | 19     | Immunoglobulin superfamily member 8                     |
| IST1      |                |        |               |        | 72           | 13     | IST1 homolog                                            |
| ITGA2     |                |        |               |        | 29           | 17     | Integrin alpha-2                                        |
| ITGA3     |                |        |               |        | 50           | 14     | Integrin alpha-3                                        |
| ITGA6     | 61             | 22     | 5             | 3      | 230          | 45     | Integrin alpha-6                                        |
| ITGAV     | 2              | 1      | 4             | 2      | 82           | 34     | Integrin alpha-V                                        |
| ITGB1     | 9              | 6      | 4             | 2      | 70           | 22     | Integrin beta-1                                         |
| ITGB5     |                |        |               |        | 24           | 9      | Integrin beta-5                                         |
| ITIH2     |                |        |               |        | 55           | 6      | Inter-alpha-trypsin inhibitor heavy chain H2            |
| ITIH3     |                |        |               |        | 40           | 5      | Inter-alpha-trypsin inhibitor heavy chain H3            |
| JAM1      |                |        |               |        | 28           | 8      | Junctional adhesion molecule A F11R                     |
| JUP       | 20             | 9      | 1             | 1      | 100          | 19     | Junction plakoglobin                                    |
| LGALS3BP  |                |        |               |        | 148          | 20     | Galectin-3-binding protein                              |
| LSR       |                |        |               |        | 36           | 8      | Lipolysis-stimulated lipoprotein receptor               |
| LYN       |                |        |               |        | 27           | 8      | Tyrosine-protein kinase Lyn                             |
| MAN1A1    |                |        |               |        | 38           | 10     | Mannosyl-oligosaccharide 1,2-alpha-mannosidase IA       |
| MELTF     |                |        |               |        | 11           | 6      | Melanotransferrin                                       |
| MEP1A     |                |        |               |        | 166          | 21     | Meprin A subunit alpha                                  |
| MFGE8     |                |        |               |        | 76           | 17     | Lactadherin                                             |
| MINK1     | 3              | 2      |               |        | 28           | 9      | Misshapen-like kinase 1                                 |
| MITD1     |                |        |               |        | 26           | 10     | MIT domain-containing protein 1                         |
| MUC13     | 16             | 5      | 7             | 2      | 174          | 11     | Mucin-13                                                |
| MVB12B    |                |        |               |        | 12           | 5      | Multivesicular body subunit 12B                         |
| MVP       | 16             | 9      | 6             | 3      | 393          | 44     | Major vault protein                                     |
| NCSTN     |                |        | 2             | 1      | 14           | 6      | Nicastrin                                               |
| PARP4     | 9              | 2      | 3             | 2      | 15           | 8      | Poly [ADP-ribose] polymerase 4                          |
| PDCD6IP   | 19             | 8      | 34            | 17     | 370          | 42     | Programmed cell death 6-interacting protein             |
| PLEKHB2   |                |        |               |        | 23           | 5      | Pleckstrin homology domain-containing family B member 2 |
| PLOD1     |                |        |               |        | 10           | 5      | Procollagen-lysine,2-oxoglutarate 5-dioxygenase 1       |
| PLPP2     |                |        |               |        | 15           | 5      | Phospholipid phosphatase 2                              |
| PLSCR1    |                |        |               |        | 53           | 7      | Phospholipid scramblase 1                               |
| PLSCR3    |                |        |               |        | 22           | 7      | Phospholipid scramblase 3                               |
| PPP1R7    | 4              | 2      | 7             | 4      | 79           | 18     | Protein phosphatase 1 regulatory subunit 7              |
| PROM1     |                |        |               |        | 67           | 20     | Prominin-1                                              |
| PSMA3     | 13             | 7      | 24            | 7      | 48           | 14     | Proteasome subunit alpha type-3                         |
| PSMB7     | 6              | 3      | 7             | 4      | 20           | 9      | Proteasome subunit beta type-7                          |
| PSMB8     | 6              | 3      | 4             | 2      | 27           | 11     | Proteasome subunit beta type-8                          |
| PSMD6     | 13             | 6      | 14            | 6      | 44           | 19     | 26S proteasome non-ATPase regulatory subunit 6          |
| PTP4A2    | 8              | 4      | 4             | 2      | 11           | 8      | Protein tyrosine phosphatase type IVA 2                 |
| QDPR      | 6              | 3      | 4             | 2      | 22           | 7      | Dihydropteridine reductase                              |
| QPCT      |                |        |               |        | 12           | 6      | Glutaminy-peptide cyclotransferase                      |
| QSOX1     |                |        |               |        | 45           | 11     | Sulfhydryl oxidase 1                                    |
| RAB35     | 24             | 3      | 23            | 3      | 64           | 8      | Ras-related protein Rab-35                              |
| RAB6B     | 16             | 3      |               |        | 50           | 6      | Ras-related protein Rab-6B                              |
| RALA      | 7              | 4      | 12            | 4      | 51           | 10     | Ras-related protein Ral-A                               |
| RALB      | 5              | 3      | 9             | 3      | 48           | 9      | Ras-related protein Ral-B                               |
| RAP1A     |                |        |               |        | 68           | 11     | Ras-related protein Rap-1A                              |
| RAP2A     |                |        |               |        | 23           | 6      | Ras-related protein Rap-2a                              |
| RAP2B     | 4              | 3      | 1             | 1      | 29           | 7      | Ras-related protein Rap-2b                              |
| RAP2C     |                |        |               |        | 40           | 9      | Ras-related protein Rap-2c                              |
| RRAS      | 5              | 2      | 2             | 1      | 16           | 5      | Ras-related protein R-Ras                               |
| RSU1      | 2              | 1      | 7             | 2      | 10           | 5      | Ras suppressor protein 1                                |
| S100-A14  | 8              | 4      | 2             | 2      | 15           | 8      | Protein                                                 |
| SCARB2    | 3              | 2      | 6             | 3      | 28           | 6      | Lysosome membrane protein 2                             |

Table S2E cont.

| Synonym  | SW948-wt cells |        | -cld7kd cells |        | SW948-wt TEX |        | Protein Description                                               |
|----------|----------------|--------|---------------|--------|--------------|--------|-------------------------------------------------------------------|
|          | Prot M         | Pept M | Prot M        | Pept M | Prot M       | Pept M |                                                                   |
| SDCBP    |                |        |               |        | 454          | 16     | Syntenin-1                                                        |
| SDCBP2   |                |        |               |        | 85           | 13     | Syntenin-2                                                        |
| SERINC5  |                |        |               |        | 68           | 8      | Serine incorporator 5 SERINC5                                     |
| SERPINE2 |                |        |               |        | 213          | 20     | Glia-derived nexin SERPINE2                                       |
| SLC1A5   | 25             | 6      | 23            | 6      | 145          | 13     | Neutral amino acid transporter B(0)                               |
| SLC29A1  |                |        |               |        | 31           | 7      | Equilibrative nucleoside transporter 1                            |
| SLC2A1   | 19             | 4      | 6             | 2      | 130          | 8      | Solute carrier family 2, facilitated glucose transporter member 1 |
| SLC44A1  |                |        |               |        | 100          | 12     | Choline transporter-like protein 1                                |
| SLC44A2  |                |        |               |        | 60           | 12     | Choline transporter-like protein 2                                |
| SMPDL3B  |                |        |               |        | 18           | 7      | Acid sphingomyelinase-like phosphodiesterase 3b                   |
| SRC      | 6              | 3      | 1             | 1      | 14           | 6      | Proto-oncogene tyrosine-protein kinase Src                        |
| ST14     |                |        |               |        | 39           | 9      | Suppressor of tumorigenicity 14 protein                           |
| STOM     |                |        |               |        | 32           | 9      | Erythrocyte band 7 integral membrane protein                      |
| STX12    |                |        |               |        | 9            | 6      | Syntaxin-12                                                       |
| STX3     | 3              | 2      | 1             | 1      | 26           | 9      | Syntaxin-3                                                        |
| STX4     |                |        |               |        | 14           | 6      | Syntaxin-4                                                        |
| STXBP2   |                |        | 5             | 4      | 15           | 9      | Syntaxin-binding protein 2                                        |
| TGFB1    |                |        |               |        | 44           | 16     | Transforming growth factor-beta-induced protein ig-h3             |
| THBS1    |                |        |               |        | 13           | 9      | Thrombospondin-1                                                  |
| TMEM106B |                |        |               |        | 15           | 5      | Transmembrane protein 106B                                        |
| TMPRSS4  |                |        |               |        | 23           | 8      | Transmembrane protease serine 4                                   |
| TNIK     | 2              | 1      | 3             | 1      | 31           | 10     | TRAF2 and NCK-interacting protein kinase                          |
| TOM1L1   |                |        |               |        | 38           | 11     | TOM1-like protein 1                                               |
| TSG101   |                |        |               |        | 82           | 15     | Tumor susceptibility gene 101 protein                             |
| TSPAN6   |                |        |               |        | 61           | 6      | Tetraspanin-6                                                     |
| TSPAN8   | 2              | 1      | 1             | 1      | 85           | 7      | Tetraspanin-8                                                     |
| TTYH3    |                |        |               |        | 63           | 7      | Protein tweety homolog 3                                          |
| TUBA1A   |                |        |               |        | 160          | 16     | Tubulin alpha-1A chain                                            |
| TUBB1    |                |        |               |        | 12           | 5      | Tubulin beta-1 chain                                              |
| UXS1     |                |        |               |        | 7            | 5      | UDP-glucuronic acid decarboxylase 1                               |
| VPS25    | 4              | 2      | 7             | 4      | 22           | 7      | Vacuolar protein-sorting-associated protein 25                    |
| VPS28    |                |        |               |        | 42           | 13     | Vacuolar protein sorting-associated protein 28 homolog            |
| VPS37B   |                |        |               |        | 28           | 6      | Vacuolar protein sorting-associated protein 37B                   |
| VPS4B    |                |        |               |        | 10           | 6      | Vacuolar protein sorting-associated protein 4B                    |
| YES1     |                |        |               |        | 14           | 5      | Tyrosine-protein kinase Yes                                       |

Table S2F

**Higher protein recovery in SW948-wt TEX than SW948-wt cells**

| Synonyme. | SW948-wt cells |        | SW948-wt TEX |        | Protein Description                                  |
|-----------|----------------|--------|--------------|--------|------------------------------------------------------|
|           | Prot M         | Pept M | Prot M       | Pept M |                                                      |
| ANXA11    | 3              | 2      | 66           | 17     | Annexin A11                                          |
| ANXA2     | 15             | 8      | 116          | 23     | Annexin A2                                           |
| ANXA7     |                |        | 10           | 6      | Annexin A7                                           |
| ASS1      |                |        | 27           | 9      | Argininosuccinate synthase                           |
| ATP5L     | 30             | 6      | 133          | 24     | ATP synthase subunit g, mitochondrial                |
| COPE      | 6              | 3      | 19           | 8      | Coatomer subunit epsilon                             |
| DHX9      | 14             | 6      | 34           | 16     | ATP-dependent RNA helicase A                         |
| DNAJC13   |                |        | 7            | 5      | DnaJ homolog subfamily C member 13                   |
| DNPEP     | 1              | 1      | 17           | 5      | Aspartyl aminopeptidase                              |
| DPEP1     | 11             | 5      | 96           | 17     | Dipeptidase 1                                        |
| EIF3F     | 6              | 3      | 19           | 10     | Eukaryotic translation initiation factor 3 subunit F |
| EIF3F     |                |        | 30           | 6      | Eukaryotic translation initiation factor 3 subunit F |
| EIF3L     | 4              | 2      | 58           | 12     | Eukaryotic translation initiation factor 3 subunit L |
| EIF3M     | 5              | 3      | 24           | 12     | Eukaryotic translation initiation factor 3 subunit M |
| EIF4E     | 1              | 1      | 13           | 5      | Eukaryotic translation initiation factor 4E          |
| FLOT1     |                |        | 64           | 23     | Flotillin-1                                          |
| FLOT2     |                |        | 52           | 23     | Flotillin-2                                          |
| GARS      |                |        | 102          | 20     | Glycine--tRNA ligase                                 |
| HBA1      | 2              | 1      | 133          | 5      | Hemoglobin subunit alpha                             |
| HIST1H2AD |                |        | 62           | 5      | Histone H2A type 1-D                                 |
| ITGB4     | 19             | 9      | 128          | 32     | Integrin beta-4                                      |
| NANS      | 6              | 3      | 26           | 8      | Sialic acid synthase                                 |
| NT5C3A    | 2              | 2      | 108          | 23     | Cytosolic 5'-nucleotidase 3A                         |
| PSMB6     | 6              | 2      | 23           | 7      | Proteasome subunit beta type-6                       |
| PYGB      | 6              | 5      | 71           | 21     | Glycogen phosphorylase, brain form                   |
| PYGL      |                |        | 26           | 7      | Glycogen phosphorylase, liver form                   |
| RAB22A    |                |        | 20           | 6      | Ras-related protein Rab-22A                          |
| RAB5A     | 8              | 4      | 36           | 8      | Ras-related protein Rab-5A                           |
| RACK1     | 12             | 7      | 163          | 18     | Receptor of activated protein C kinase 1             |
| RANGAP1   | 2              | 2      | 82           | 10     | Ran GTPase-activating protein 1                      |
| RPL10A    | 2              | 1      | 34           | 7      | 60S ribosomal protein L10a                           |
| RPL12     | 5              | 3      | 28           | 6      | 60S ribosomal protein L12                            |
| RPL18     | 1              | 1      | 33           | 7      | 60S ribosomal protein L18                            |
| RPL6      |                |        | 22           | 10     | 60S ribosomal protein L6                             |
| RPLP0     | 6              | 4      | 139          | 13     | 60S acidic ribosomal protein P0                      |
| RPLP2     |                |        | 23           | 5      | 60S acidic ribosomal protein P2                      |
| RPS7      | 1              | 1      | 15           | 5      | 40S ribosomal protein S7                             |
| RPSA      | 3              | 3      | 159          | 11     | 40S ribosomal protein SA                             |
| SEPT9     | 9              | 3      | 20           | 8      | Septin-9                                             |
| SLC7A1    | 1              | 1      | 25           | 5      | High affinity cationic amino acid transporter 1      |
| SYNGR2    | 4              | 2      | 31           | 5      | Synaptogyrin-2                                       |
| WARS      | 3              | 2      | 34           | 7      | Tryptophan--tRNA ligase, cytoplasmic                 |

Table S2G

**Higher protein recovery in SW948-wt TEX than SW948-cld7kd cells**

| Synonym | SW948-cld7kd cells |         | SW948-wt TEX |         | Protein Description                            |
|---------|--------------------|---------|--------------|---------|------------------------------------------------|
|         | Prot M             | Pept M. | Prot M       | Pept M. |                                                |
| ACTR1A  |                    |         | 11           | 5       | Alpha-centractin                               |
| CDH1    | 6                  | 3       | 21           | 8       | Cadherin-1                                     |
| CTNNB1  | 4                  | 3       | 70           | 20      | Catenin beta-1                                 |
| FTH1    | 11                 | 4       | 102          | 11      | Ferritin heavy chain                           |
| IGF2R   | 30                 | 12      | 42           | 25      | Cation-independent mannose-6-phosphate recept. |
| KRAS    |                    |         | 15           | 5       | GTPase KRas                                    |
| LAMTOR1 | 7                  | 3       | 15           | 6       | Ragulator complex protein LAMTOR1              |
| LIN7C   |                    |         | 19           | 9       | Protein lin-7 homolog C                        |
| OLFM4   |                    |         | 8            | 6       | Olfactomedin-4                                 |
| PRMT1   | 18                 | 4       | 59           | 11      | Protein arginine N-methyltransferase 1         |
| PSMD7   | 10                 | 5       | 38           | 11      | 26S proteasome non-ATPase regulatory subunit 7 |
| PTPRF   |                    |         | 20           | 13      | Receptor-type tyrosine-protein phosphatase F   |
| PYCR1   | 2                  | 1       | 12           | 5       | Pyroline-5-carboxylate reductase 3             |
| RAB25   |                    |         | 12           | 5       | Ras-related protein Rab-25                     |
| RAP1B   | 16                 | 6       | 73           | 12      | Ras-related protein Rap-1b                     |
| RDX     |                    |         | 82           | 10      | Radixin                                        |
| REEP6   | 3                  | 2       | 8            | 5       | Receptor expression-enhancing protein 6        |
| RHOB    |                    |         | 16           | 5       | Rho-related GTP-binding protein RhoB           |
| SLC16A3 |                    |         | 36           | 5       | Monocarboxylate transporter 4                  |
| SLC3A2  | 45                 | 12      | 169          | 24      | 4F2 cell-surface antigen heavy chain           |
| TM9SF2  | 7                  | 3       | 43           | 10      | Transmembrane 9 superfamily member 2           |
| TSPAN14 |                    |         | 61           | 9       | Tetraspanin-14                                 |
| TSPAN15 |                    |         | 38           | 6       | Tetraspanin-15                                 |
| TSTA3   | 3                  | 2       | 18           | 5       | GDP-L-fucose synthase                          |



Table S3

**Claudin protein complexes in cells and TEX**

Table S3A

**Association with palmitoylated and non-palmitoylated cld7 in cells**

| synonym | cld7 IP       |        |               |        | Protein Description                           |
|---------|---------------|--------|---------------|--------|-----------------------------------------------|
|         | ASML-wt cells |        | -cld7mP cells |        |                                               |
|         | Prot.M        | Pept.M | Prot.M        | Pept.M |                                               |
| Bcap31  | 11            | 5      | 16            | 9      | B-cell receptor-associated protein 31         |
| Cabp1   | 10            | 8      | 10            | 10     | calcium binding protein                       |
| Cisd2   | 2             | 2      | 6             | 4      | CDGSH iron-sulfur domain-cont. protein 2      |
| Copa    | 127           | 83     | 164           | 127    | coatamer protein complex subunit alpha        |
| Ddx5    | 18            | 15     | 8             | 7      | DEAD box helicase 5                           |
| Eef1a1  | 93            | 48     | 61            | 55     | elongation factor 1-alpha, beta, delta, gamma |
| Erp29   | 6             | 4      | 5             | 3      | endoplasmic reticulum resident protein 29     |
| Ewsr1   | 13            | 11     | 29            | 21     | RNA-binding protein EWS                       |
| Fkbp12  | 4             | 2      | 5             | 4      | FK506-binding protein 12                      |
| Hspa1a  | 23            | 18     | 16            | 11     | heat shock protein 70                         |
| Hspe1   | 11            | 4      | 13            | 8      | chaperonin 10                                 |
| Myl3    | 29            | 17     | 43            | 30     | myosin light chain 3                          |
| Myo1b   | 51            | 41     | 93            | 75     | myosin I heavy chain                          |
| Rab2a   | 12            | 9      | 14            | 11     | Rab-2A                                        |
| Rpl10   | 9             | 6      | 7             | 5      | 60S ribosomal protein L10                     |
| Rpl17   | 5             | 3      | 6             | 6      | 60S ribosomal protein L17                     |
| Rplp0   | 20            | 16     | 19            | 16     | 60S acidic ribosomal protein P0               |
| Rps17   | 13            | 4      | 8             | 5      | 40S ribosomal protein S17                     |
| Rps2    | 19            | 10     | 11            | 7      | ribosomal protein S2                          |
| Rps21   | 7             | 4      | 12            | 9      | 40S ribosomal protein S21                     |
| Rps26   | 3             | 3      | 5             | 4      | 40S ribosomal protein S26                     |
| Rps3a   | 22            | 11     | 22            | 10     | 40S ribosomal protein S3a                     |
| Rps9    | 12            | 7      | 8             | 5      | Ribosomal protein L9                          |
| Rpsa    | 16            | 12     | 15            | 12     | 40S ribosomal protein SA                      |
| Sp120   | 22            | 12     | 16            | 10     | serine protease 120                           |
| Sqrdl   | 23            | 17     | 20            | 17     | sulfide:quinone oxidoreductase                |
| Testin  | 129           | 74     | 106           | 66     | testin                                        |
| Ubc     | 35            | 12     | 36            | 14     | ubiquitin C                                   |

Table S3B

**Association with palmitoylation-competent cld7 in cells**

| synonym | cld7 IP       |        |               |        | Protein Description                                                    |
|---------|---------------|--------|---------------|--------|------------------------------------------------------------------------|
|         | ASML-wt cells |        | -cld7mP cells |        |                                                                        |
|         | Prot.M        | Pept.M | Prot.M        | Pept.M |                                                                        |
| Aifm1   | 8             | 4      | 1             | 1      | apoptosis-inducing factor                                              |
| Cse1    | 25            | 16     |               |        | exportin-2                                                             |
| Dnajp9  | 38            | 22     | 3             | 2      | dnaJ homolog subfamily C member 9                                      |
| HnrnpM  | 24            | 19     |               |        | heterogeneous nuclear ribonucleoprotein M                              |
| Hnrpd   | 9             | 8      | 3             | 2      | RNA binding protein p42 AUF1                                           |
| Hspa1b  | 124           | 101    |               |        | heat shock protein 70kd 1B                                             |
| Hspa9   | 14            | 11     | 6             | 4      | heat shock protein 90, alpha                                           |
| Idh3a   | 8             | 5      |               |        | isocitrate dehydrogenase subunit alpha                                 |
| Il33    | 10            | 7      |               |        | interleukin-33                                                         |
| Impdh2  | 34            | 23     |               |        | inosine-5'-monophosphate dehydrogenase 2                               |
| Impdh2  | 34            | 23     | 2             | 1      | inosine-5'-monophosphate dehydrogenase 2                               |
| Ionp1   | 8             | 6      |               |        | Ion protease homolog                                                   |
| Lmo2    | 26            | 16     |               |        | LIM domain 2                                                           |
| Myh13   | 16            | 12     |               |        | myosin-13                                                              |
| Parp1   | 19            | 13     |               |        | poly [ADP-ribose] polymerase 1                                         |
| Rpl4    | 13            | 9      | 4             | 2      | 60S ribosomal protein L4                                               |
| Smarca5 | 7             | 5      |               |        | SWI/SNF-related matrix-associated actin-dep. regulator of chromatin A5 |
| Ssbp1   | 16            | 12     |               |        | single-stranded DNA-binding protein, mitochondrial precursor           |
| Xrcc5   | 5             | 4      |               |        | X-ray repair cross-complementing protein 5                             |
| Xrcc6   | 8             | 5      |               |        | X-ray repair complementing defective repair                            |

Table S3C

Association with palmitoylation-deficient *cld7* in cells

| synonym  | cld7 IP       |        |               |        | Protein Description                                   |
|----------|---------------|--------|---------------|--------|-------------------------------------------------------|
|          | ASML-wt cells |        | -cld7mP cells |        |                                                       |
|          | Prot.M        | Pept.M | Prot.M        | Pept.M |                                                       |
| Ahnak    | 4             | 1      | 56            | 32     | neuroblast differentiation-associated protein AHNAK   |
| Ahsg     | 2             | 1      | 30            | 23     | alpha-2-HS-glycoprotein                               |
| Far1     |               |        | 12            | 9      | fatty acyl-CoA reductase 1                            |
| Flii     | 4             | 2      | 14            | 9      | flightless-1 homolog                                  |
| Gnai3    | 15            | 14     | 30            | 29     | guanine nucleotide-binding protein G(k) subunit alpha |
| Hadhb    |               |        | 10            | 6      | hydroxyacyl-CoA dehydrogenase, beta subunit           |
| Hsd17b12 |               |        | 4             | 4      | estradiol 17-beta-dehydrogenase 12                    |
| Hsph1    |               |        | 8             | 6      | heat shock protein 105 kDa                            |
| Krt33b   |               |        | 11            | 8      | keratin, type I cuticular Ha3-II                      |
| Krt4     |               |        | 36            | 26     | keratin, type II cytoskeletal 4                       |
| Lad1     |               |        | 11            | 7      | ladinin 1                                             |
| Ldhal6b  |               |        | 5             | 4      | L-lactate dehydrogenase A-like 6B                     |
| Myl2     |               |        | 137           | 114    | myosin light chain 2                                  |
| Myl6l    |               |        | 204           | 163    | myosin light polypeptide 6                            |
| Ppa1     |               |        | 4             | 4      | pyrophosphatase 1                                     |
| Prkcz    | 14            | 6      | 20            | 15     | protein kinase C zeta                                 |
| Rab18    | 6             | 1      | 18            | 14     | ras-related protein Rab-18                            |
| Rab5a    |               |        | 8             | 6      | ras-related protein Rab-5A                            |
| Reep6    | 2             | 1      | 6             | 6      | receptor expression-enhancing protein 6               |
| Tecr     | 1             | 1      | 12            | 5      | very-long-chain enoyl-CoA reductase                   |
| Tfg      | 12            | 7      | 51            | 26     | Trk-fused gene                                        |
| Trim21   | 3             | 2      | 64            | 53     | E3 ubiquitin-protein ligase TRIM21                    |

Table S3D

**Co-immunoprecipitation with palmitoylated and non-palmitoylated cld7 in TEX**  
**anti-cld7 IP**

| Synonym  | ASML-wt TEX |        | -cld7mP TEX |        | Protein Description                                               |
|----------|-------------|--------|-------------|--------|-------------------------------------------------------------------|
|          | Prot.M      | Pept.M | Prot.M      | Pept.M |                                                                   |
| Acot7    | 25          | 4      | 40          | 6      | Acyl-CoA thioesterase 7                                           |
| Actn4    | 34          | 14     | 27          | 15     | alpha-actinin 4                                                   |
| Actr2    | 21          | 6      | 55          | 9      | Actin-related protein 2                                           |
| Ahcy     | 44          | 10     | 67          | 10     | Adenosylhomocysteinase                                            |
| Akr1b1   | 37          | 7      | 60          | 8      | Aldose reductase                                                  |
| Akr1b8   | 47          | 10     | 144         | 12     | aldose reductase-related protein 1                                |
| Alb      | 139         | 4      | 187         | 5      | Serum albumin                                                     |
| Aldoa    | 32          | 12     | 25          | 9      | Fructose-bisphosphate aldolase A                                  |
| Anxa2    | 113         | 17     | 91          | 15     | annexin A2                                                        |
| Anxa5    | 42          | 12     | 45          | 14     | Annexin A5                                                        |
| Ap2s1    | 5           | 3      | 12          | 4      | AP-2 complex subunit sigma                                        |
| Aprt     | 16          | 6      | 58          | 8      | Adenine phosphoribosyltransferase                                 |
| Asap1    | 7           | 2      | 8           | 5      | Arf-GAP with SH3 domain, ANK repeat and PH domain-cont. protein 1 |
| Atp5b    | 27          | 11     | 58          | 16     | ATP synthase subunit beta                                         |
| Atp6ap2  | 5           | 3      | 7           | 5      | Renin receptor                                                    |
| C3       | 10          | 4      | 35          | 8      | Complement C3                                                     |
| Cand1    | 12          | 7      | 6           | 4      | Cullin-associated NEDD8-dissociated protein 1                     |
| Cd81     | 12          | 3      | 33          | 4      | CD81 tetraspanin                                                  |
| Cd9      | 13          | 4      | 39          | 5      | CD9 tetraspanin                                                   |
| Cltc     | 35          | 18     | 81          | 26     | Clathrin heavy chain                                              |
| Dstn     | 17          | 3      | 36          | 4      | Destrin                                                           |
| Eno3     | 69          | 5      | 58          | 6      | Enolase beta                                                      |
| Epcam    | 10          | 5      | 17          | 5      | Epithelial cell adhesion molecule                                 |
| Ezr      | 50          | 8      | 117         | 14     | Ezrin                                                             |
| Fn1      | 374         | 76     | 211         | 62     | Fibronectin                                                       |
| G6pc     | 13          | 6      | 42          | 8      | Glucose-6-phosphatase                                             |
| Gapdh    | 98          | 11     | 158         | 12     | Glyceraldehyde-3-phosphate dehydrogenase                          |
| Got2     | 64          | 9      | 60          | 14     | Aspartate aminotransferase                                        |
| Gsn      | 4           | 3      | 16          | 4      | Gelsolin                                                          |
| Hsp90aa1 | 218         | 25     | 514         | 35     | Heat shock protein HSP 90-alpha                                   |
| Hsp90b1  | 23          | 3      | 50          | 5      | Endoplasmin                                                       |
| Hspa2    | 110         | 9      | 180         | 10     | Heat shock-related 70 kDa protein 2                               |
| Hspa5    | 33          | 8      | 57          | 14     | 78 kDa glucose-regulated protein                                  |
| Htra1    | 103         | 20     | 114         | 27     | Serine protease HTRA1                                             |
| Jup      | 5           | 4      | 5           | 3      | Junction plakoglobin                                              |
| Kb15     | 53          | 9      | 55          | 5      | keratin, type II cytoskeletal cochleal                            |
| Kpnb1    | 11          | 2      | 19          | 4      | Importin subunit beta-1                                           |
| Krt1     | 50          | 8      | 92          | 7      | Keratin, type II cytoskeletal 1                                   |
| Krt10    | 49          | 10     | 66          | 10     | Keratin, type I cytoskeletal 10                                   |
| Krt14    | 25          | 7      | 39          | 10     | Keratin, type I cytoskeletal 14                                   |
| Krt16    | 16          | 4      | 26          | 8      | keratin, type I cytoskeletal 16                                   |
| Krt17    | 41          | 11     | 32          | 13     | keratin, type I cytoskeletal 17                                   |
| Krt18    | 32          | 10     | 20          | 8      | keratin, type I cytoskeletal 18                                   |
| Krt19    | 42          | 15     | 41          | 13     | keratin, type I cytoskeletal 19                                   |
| Krt42    | 16          | 6      | 30          | 11     | Keratin, type I cytoskeletal 42                                   |
| Krt5     | 42          | 8      | 106         | 11     | Keratin, type II cytoskeletal 5                                   |
| Krt75    | 35          | 9      | 46          | 6      | Keratin, type II cytoskeletal 75                                  |
| Ldha     | 163         | 20     | 185         | 18     | L-lactate dehydrogenase                                           |
| Mfge8    | 45          | 15     | 127         | 21     | Lactadherin                                                       |
| Msn      | 48          | 8      | 78          | 10     | Moesin                                                            |
| Myh10    | 19          | 10     | 25          | 14     | Myosin, heavy polypeptide 10                                      |
| Myh9     | 36          | 15     | 41          | 16     | Myosin, heavy polypeptide 9                                       |
| Myof     | 10          | 3      | 16          | 5      | Myoferlin                                                         |
| Pfn1     | 61          | 7      | 115         | 6      | Profilin-1                                                        |
| Pgk1     | 150         | 17     | 164         | 16     | Phosphoglycerate kinase 1                                         |
| Phb2     | 14          | 9      | 10          | 6      | Prohibitin-2                                                      |
| Pkm      | 247         | 22     | 457         | 32     | Pyruvate kinase PKM                                               |
| Ppia     | 26          | 9      | 31          | 10     | Peptidyl-prolyl cis-trans isomerase A                             |
| Prdx2    | 18          | 4      | 22          | 4      | Peroxiredoxin-2                                                   |
| Psma1    | 20          | 9      | 36          | 8      | Proteasome subunit alpha type-1                                   |
| Psma2    | 12          | 6      | 23          | 7      | Proteasome subunit alpha type-2                                   |

Table S3D cont.

| Synonym  | anti-cld7 IP |        |             |        | Protein Description                                 |
|----------|--------------|--------|-------------|--------|-----------------------------------------------------|
|          | ASML-wt TEX  |        | -cld7mP TEX |        |                                                     |
|          | Prot.M       | Pept.M | Prot.M      | Pept.M |                                                     |
| Psm3     | 6            | 4      | 23          | 7      | Proteasome subunit alpha type                       |
| Psm6     | 13           | 6      | 45          | 10     | Proteasome subunit alpha type-6                     |
| Psm3     | 26           | 6      | 41          | 6      | Proteasome subunit beta type                        |
| Psm7     | 3            | 2      | 11          | 4      | Proteasome subunit beta type-7                      |
| Psm8     | 10           | 6      | 70          | 11     | Proteasome subunit beta type                        |
| Psm9     | 10           | 3      | 12          | 4      | Proteasome subunit beta type                        |
| Rab10    | 27           | 5      | 20          | 3      | Ras-related protein Rab-10                          |
| Rab11b   | 12           | 8      | 43          | 10     | Ras-related Rab-11B                                 |
| Rheb     | 6            | 3      | 7           | 4      | GTP-binding protein Rheb                            |
| Rpl10a   | 11           | 5      | 29          | 5      | 60S ribosomal protein L10a                          |
| Sept2    | 21           | 5      | 46          | 7      | Septin-2                                            |
| Serpinc1 | 6            | 4      | 16          | 3      | Serpin family C member 1                            |
| Sptan1   | 9            | 6      | 19          | 9      | Spectrin alpha chain 1                              |
| Tkt      | 24           | 8      | 44          | 11     | Transketolase                                       |
| Tpi1     | 21           | 7      | 34          | 7      | Triosephosphate isomerase 1                         |
| Tspan8   | 14           | 3      | 29          | 5      | Tetraspanin 8                                       |
| Vcp      | 91           | 25     | 134         | 21     | Transitional endoplasmic reticulum ATPase           |
| Vdac1    | 29           | 9      | 23          | 8      | Voltage-dependent anion-selective channel protein 1 |
| Xpo1     | 7            | 3      | 15          | 6      | exportin 1                                          |
| Ywhag    | 27           | 5      | 25          | 3      | 14-3-3 protein gamma                                |

Table S3E

**Co-immunoprecipitation with palmitoylation competent cld7 in TEX**

| Synonym  | anti-cld7 IP |        |             |        | Protein Description                                            |
|----------|--------------|--------|-------------|--------|----------------------------------------------------------------|
|          | ASML-wt TEX  |        | -cld7mP TEX |        |                                                                |
|          | Prot.M       | Pept.M | Prot.M      | Pept.M |                                                                |
| Actn1    | 16           | 6      |             |        | alpha-actinin 1                                                |
| Col18a1  | 60           | 15     | 6           | 3      | Procollagen, type XVIII, alpha 1                               |
| Ddost    | 8            | 5      |             |        | Dolichyl-diphosphooligosaccharide--protein glycosyltransferase |
| Fasn     | 12           | 6      |             |        | Fatty acid synthase                                            |
| H2afy    | 122          | 13     | 13          | 5      | Core histone macro-H2A.1                                       |
| Hist1h1a | 93           | 9      |             |        | Histone H1.1                                                   |
| Hp1bp3   | 41           | 9      | 2           | 1      | Heterochromatin protein 1-binding protein 3                    |
| Itga3    | 17           | 8      | 7           | 4      | Integrin, alpha 3                                              |
| Itga6    | 17           | 8      | 6           | 4      | Integrin, alpha 6                                              |
| Itgb1    | 16           | 10     | 4           | 4      | Integrin beta 1                                                |
| Ncl      | 127          | 24     |             |        | Nucleolin                                                      |
| Npm1     | 69           | 7      | 3           | 2      | Nucleophosmin                                                  |
| Pdia4    | 8            | 4      |             |        | disulfide-isomerase A4                                         |
| Set      | 34           | 5      | 4           | 2      | SET nuclear protooncogene                                      |
| Taldo1   | 7            | 4      |             |        | Transaldolase 1                                                |

Table S3F

## Co-immunoprecipitation with non-palmitoylated cld7

| Synonym   | anti-cld7 IP |        |             |        | Protein Description                                  |
|-----------|--------------|--------|-------------|--------|------------------------------------------------------|
|           | ASML-wt TEX  |        | -cld7mP TEX |        |                                                      |
|           | Prot.M       | Pept.M | Prot.M      | Pept.M |                                                      |
| Anxa3     | 3            | 1      | 18          | 7      | annexin A3                                           |
| Apob      |              |        | 15          | 6      | Apolipoprotein B-100                                 |
| Arpc1b    |              |        | 10          | 4      | Actin-related protein 2/3 complex subunit 1B         |
| Arpc3     | 4            | 1      | 16          | 7      | Actin-related protein 2/3 complex subunit 3          |
| Asl       |              |        | 84          | 14     | Argininosuccinate lyase                              |
| Cad       |              |        | 12          | 4      | DNA fragmentation factor subunit beta                |
| Capns1    | 2            | 1      | 10          | 4      | Calpain small subunit 1                              |
| Cav2      |              |        | 27          | 4      | Caveolin2                                            |
| Cct2      | 12           | 6      | 147         | 19     | T-complex protein 1 subunit beta                     |
| Cct3      | 9            | 4      | 74          | 16     | T-complex protein 1 subunit gamma                    |
| Cct4      | 7            | 3      | 82          | 14     | T-complex protein 1 subunit delta                    |
| Cct5      | 1            | 1      | 40          | 11     | T-complex protein 1 subunit epsilon                  |
| Cct6a     | 14           | 4      | 77          | 14     | Chaperonin containing Tcp1, subunit 6A               |
| Cct7      | 2            | 2      | 65          | 15     | T-complex protein 1 subunit eta                      |
| Cct8      | 8            | 5      | 64          | 14     | Chaperonin subunit theta                             |
| Cfl1      | 1            | 1      | 28          | 6      | Cofilin-1                                            |
| Clic1     | 3            | 2      | 33          | 7      | Chloride intracellular channel protein 1             |
| Ddx39b    |              |        | 13          | 7      | Spliceosome RNA helicase Ddx39b                      |
| Eef1d     | 4            | 1      | 30          | 5      | Elongation factor 1-delta                            |
| Eif2s1    |              |        | 19          | 4      | Eukaryotic translation initiation factor 2 subunit 1 |
| Eif2s3    |              |        | 16          | 4      | Eukaryotic translation initiation factor 2 subunit 3 |
| Eif3b     | 6            | 3      | 38          | 8      | Eukaryotic translation initiation factor 3 subunit B |
| Eif3c     | 1            | 1      | 50          | 13     | Eukaryotic translation initiation factor 3 subunit C |
| Eif3d     |              |        | 12          | 5      | Eukaryotic translation initiation factor 3 subunit D |
| Eif3f     | 6            | 2      | 28          | 7      | eukaryotic translation initiation factor 3 subunit F |
| Eif3h     | 1            | 1      | 44          | 11     | Eukaryotic translation initiation factor 3 subunit H |
| Eif3i     |              |        | 12          | 5      | Eukaryotic translation initiation factor 3 subunit I |
| Eif3m     | 8            | 5      | 107         | 12     | Eukaryotic translation initiation factor 3 subunit M |
| Eprs      | 3            | 2      | 33          | 7      | glutamyl-propyl-tRNA synthetase                      |
| Farsa     | 1            | 1      | 26          | 9      | Phenylalanine--tRNA ligase alpha subunit             |
| Hspa4     | 4            | 3      | 71          | 16     | Heat shock 70 kDa protein 4                          |
| Kars      |              |        | 19          | 6      | Lysine--tRNA ligase                                  |
| Lgals3    | 1            | 1      | 7           | 4      | Galectin-3                                           |
| LOC286987 |              |        | 6           | 4      | Hemiferrin                                           |
| Mdh2      | 13           | 3      | 41          | 9      | Malate dehydrogenase 2                               |
| Mrto4     |              |        | 10          | 4      | MRT4 homolog, ribosome maturation factor             |
| Mtap      | 2            | 2      | 21          | 6      | Methythioadenosine phosphorylase                     |
| Myh14     |              |        | 14          | 5      | Myosin heavy chain 14                                |
| Nemf      | 3            | 2      | 17          | 5      | Nuclear export mediator factor                       |
| Pa2g4     | 5            | 3      | 45          | 9      | Proliferation-associated protein 2G4                 |
| Pcna      | 3            | 2      | 38          | 9      | Proliferating cell nuclear antigen                   |
| Pdcd6     | 2            | 1      | 12          | 4      | Programmed cell death 6                              |
| Pdcd6ip   | 4            | 2      | 8           | 6      | Programmed cell death 6-interacting protein          |
| Plscr3    |              |        | 22          | 6      | Phospholipid scramblase 3                            |
| Psma4     | 12           | 1      | 40          | 8      | Proteasome subunit alpha type                        |
| Psmd13    | 2            | 1      | 16          | 6      | 26S proteasome non-ATPase regulatory subunit 13      |
| Psmd3     |              |        | 50          | 11     | Proteasome 26S subunit, non-ATPase, 3                |
| Ptgfrn    |              |        | 38          | 15     | Prostaglandin F2 receptor negative regulator         |
| Ptrf      |              |        | 18          | 6      | Polymerase I and transcript release factor           |
| Rab14     | 9            | 3      | 45          | 11     | Rab14, member RAS oncogene family                    |
| Rab5c     | 5            | 2      | 16          | 7      | Rab5c, member RAS oncogene family                    |
| Rtn4      |              |        | 14          | 6      | Reticulon 4                                          |
| Sdcbp     | 17           | 3      | 44          | 6      | Syntenin-1                                           |
| Sept7     |              |        | 24          | 4      | Septin-7                                             |
| Shmt1     | 5            | 2      | 79          | 12     | Serine hydroxymethyltransferase 1                    |
| Ssr4      | 3            | 2      | 19          | 6      | Translocon-associated protein subunit delta          |
| Tagln2    | 1            | 1      | 105         | 27     | Transgelin-2                                         |
| Tcp1      | 19           | 4      | 141         | 20     | T-complex protein 1 subunit alpha                    |
| Thbs1     | 2            | 1      | 11          | 5      | Thrombospondin 1                                     |
| Tsn       |              |        | 12          | 4      | translin                                             |
| Vat1      | 1            | 1      | 24          | 5      | Synaptic vesicle membrane protein VAT-1 homolog      |

Table S4  
**Cld7-dependent miRNA recovery in cells and TEX**

Table S4A

**Cld7 dependent miRNA recovery in cells**

| name        | ASML-wt<br>cells | -cld7kd<br>cells <sup>1</sup> | -cld7mP<br>cells <sup>1</sup> |
|-------------|------------------|-------------------------------|-------------------------------|
| miR-34a-5p  | 1337             | <b><u>436</u></b>             | <b><u>538</u></b>             |
| miR-141-3p  | 6627             | <b><u>1705</u></b>            | 4159                          |
| miR-10a-5p  | 2420             | <b><u>2162</u></b>            | <b><u>339</u></b>             |
| miR-26b-5p  | 1287             | <b><u>1098</u></b>            | <b><u>653</u></b>             |
| miR-1224    | 1031             | <b><u>3537</u></b>            | <b><u>2681</u></b>            |
| let-7e-5p   | 1110             | <b><u>2615</u></b>            | 1433                          |
| miR-103-3p  | 1734             | <b><u>3691</u></b>            | 2674                          |
| miR-301a-3p | 684              | <b><u>1378</u></b>            | 1062                          |

Table S4B

**Cld7 dependent miRNA recovery in TEX**

| Name         | ASML-wt<br>TEX | -cld7kd<br>TEX <sup>a</sup> | -cld7mP<br>TEX <sup>a</sup> |
|--------------|----------------|-----------------------------|-----------------------------|
| let-7b-5p    | 3940           | <b><u>1840</u></b>          | <b><u>1628</u></b>          |
| let-7c-5p    | 4653           | <b><u>1655</u></b>          | <b><u>1660</u></b>          |
| miR-125b-5p  | 17652          | <b><u>5483</u></b>          | <b><u>2713</u></b>          |
| miR-200b-3p  | 1365           | <b><u>280</u></b>           | <b><u>350</u></b>           |
| miR-347      | 1236           | <b><u>224</u></b>           | <b><u>431</u></b>           |
| miR-494-3p   | 1776           | <b><u>180</u></b>           | <b><u>385</u></b>           |
| let-7a-5p    | 3250           | <b><u>567</u></b>           | 1903                        |
| let-7d-5p    | 1264           | <b><u>239</u></b>           | 1117                        |
| let-7f-5p    | 2183           | <b><u>167</u></b>           | 1464                        |
| let-7g-5p    | 1377           | <b><u>454</u></b>           | 979                         |
| miR-10a-5p   | 1185           | <b><u>309</u></b>           | 673                         |
| miR-21-5p    | 8288           | <b><u>3221</u></b>          | 5094                        |
| miR-29b-3p   | 2010           | <b><u>586</u></b>           | 1163                        |
| miR-16-5p    | 2488           | <b><u>1625</u></b>          | <b><u>1035</u></b>          |
| miR-183-5p   | 1096           | <b><u>698</u></b>           | <b><u>529</u></b>           |
| miR-1224     | 10744          | <b><u>25080</u></b>         | <b><u>23754</u></b>         |
| miR-211-3p   | 363            | <b><u>2152</u></b>          | <b><u>5280</u></b>          |
| miR-3584-5p  | 281            | <b><u>1589</u></b>          | <b><u>832</u></b>           |
| miR-483-5p   | 472            | <b><u>1472</u></b>          | <b><u>1655</u></b>          |
| miR-6216     | 190            | <b><u>684</u></b>           | <b><u>1124</u></b>          |
| miR-3084c-5p | 210            | <b><u>1473</u></b>          | 283                         |
| miR-222-3p   | 185            | <b><u>1188</u></b>          | 234                         |
| miR-3473     | 1795           | <b><u>5160</u></b>          | 2700                        |
| miR-130a-3p  | 749            | <b><u>1683</u></b>          | 836                         |
| miR-188-5p   | 538            | <b><u>1215</u></b>          | 502                         |
| miR-210-3p   | 217            | <b><u>4005</u></b>          | 247                         |
| miR-221-3p   | 338            | <b><u>1200</u></b>          | 360                         |
| miR-155-5p   | 401            | <b><u>355</u></b>           | <b><u>1977</u></b>          |
| miR-1896     | 448            | <b><u>753</u></b>           | <b><u>5895</u></b>          |
| miR-290      | 214            | <b><u>337</u></b>           | <b><u>1622</u></b>          |
| miR-3099     | 166            | <b><u>180</u></b>           | <b><u>1034</u></b>          |

<sup>1</sup> >2-fold differences: bold and underlined

Table S4C  
miR recovery in SW948-wt and -cld7kd cells and TEX

| Name <sup>2</sup>  | wt>cld7kd cells <sup>1</sup> |               | wt>cld7kd TEX <sup>1</sup> |              |
|--------------------|------------------------------|---------------|----------------------------|--------------|
|                    | SW948-wt cells               | -cld7kd cells | SW948-wt TEX               | -cld7kd TEX  |
| <u>let-7e-5p</u>   | 927                          | <b>471</b>    | 1307                       | <b>497</b>   |
| let-7i-5p          |                              |               | 3208                       | <b>1449</b>  |
| <u>miR-10a-5p</u>  | 9583                         | <b>5304</b>   | 14495                      | <b>5343</b>  |
| miR-1225-5p        | 1197                         | <b>585</b>    |                            |              |
| <u>miR-1246</u>    | 3783                         | <b>1176</b>   | 94418                      | <b>44135</b> |
| miR-1273g-3p       | 4890                         | <b>1992</b>   |                            |              |
| <u>miR-1290</u>    | (597)                        | <b>(181)</b>  | 47002                      | <b>14923</b> |
| <u>miR-135b-5p</u> | 1615                         | <b>689</b>    | 1211                       | <b>569</b>   |
| miR-151b           |                              |               | 1170                       | <b>347</b>   |
| <u>miR-210-3p</u>  | 7220                         | <b>548</b>    | 2916                       | <b>1074</b>  |
| <u>miR-22-3p</u>   | 1870                         | <b>495</b>    | 2267                       | <b>520</b>   |
| <u>miR-23a-3p</u>  | 2504                         | <b>1072</b>   | 4279                       | <b>2006</b>  |
| miR-27a-3p         | 3703                         | <b>1408</b>   |                            |              |
| miR-29b-3p         | 30513                        | <b>14033</b>  |                            |              |
| <u>miR-31-5p</u>   | 1037                         | <b>444</b>    | 1477                       | <b>359</b>   |
| miR-320d           |                              |               | 7963                       | <b>3625</b>  |
| miR-320e           |                              |               | 6077                       | <b>1611</b>  |
| <u>miR-3934-5p</u> | 3048                         | <b>102</b>    | 2748                       | <b>660</b>   |
| <u>miR-4299</u>    | 2287                         | <b>1316</b>   | 3193                       | <b>933</b>   |
| miR-4530           | 4727                         | <b>1976</b>   |                            |              |
| miR-4455           |                              |               | 2632                       | <b>317</b>   |
| miR-451a           |                              |               | 4534                       | <b>1407</b>  |
| <u>miR-4763-3p</u> | (530)                        | <b>(188)</b>  | 3043                       | <b>1207</b>  |
| <u>miR-574-5p</u>  | 1011                         | <b>482</b>    | 17605                      | <b>1774</b>  |
| miR-6753-5p        |                              |               | 1560                       | <b>657</b>   |
| <u>miR-8089</u>    | 4219                         | <b>104</b>    | 3934                       | <b>870</b>   |
|                    | wt<cld7kd cells <sup>1</sup> |               | wt<cld7kd TEX <sup>1</sup> |              |
|                    | SW948-wt cells               | -cld7kd cells | SW948-wt TEX               | -cld7kd TEX  |
| miR-1260a          |                              |               | 974                        | <b>3131</b>  |
| miR-1260b          |                              |               | 920                        | <b>2038</b>  |
| miR-1287-5p        |                              |               | 285                        | <b>4315</b>  |
| miR-146a-5p        |                              |               | 871                        | <b>1883</b>  |
| miR-27b-3p         | 1031                         | <b>2366</b>   |                            |              |
| miR-3141           |                              |               | 301                        | <b>2311</b>  |
| <u>miR-3162-5p</u> | 2125                         | <b>4573</b>   | 5165                       | <b>10986</b> |
| miR-3665           |                              |               | 1728                       | <b>4103</b>  |
| miR-3937           |                              |               | 384                        | <b>1685</b>  |
| miR-4271           |                              |               | 702                        | <b>4049</b>  |
| miR-4298           |                              |               | 446                        | <b>2510</b>  |
| miR-4430           |                              |               | 621                        | <b>1632</b>  |
| miR-4443           |                              |               | 1280                       | <b>3960</b>  |
| miR-4485-5p        |                              |               | 739                        | <b>2335</b>  |
| miR-4487           |                              |               | 199                        | <b>1952</b>  |
| miR-4497           |                              |               | 410                        | <b>1566</b>  |
| miR-4685-5p        |                              |               | 371                        | <b>5537</b>  |
| miR-483-5p         |                              |               | 506                        | <b>2323</b>  |
| <u>miR-6087</u>    | 3416                         | <b>5624</b>   | 14591                      | <b>38655</b> |
| <u>miR-6089</u>    | 7536                         | <b>14649</b>  | 17444                      | <b>42264</b> |
| miR-6124           |                              |               | 1037                       | <b>2416</b>  |
| miR-642a-3p        | 1312                         | <b>3214</b>   |                            |              |
| miR-6786-5p        |                              |               | 742                        | <b>1504</b>  |
| miR-6800-5p        |                              |               | 2673                       | <b>6057</b>  |
| <u>miR-6869-5p</u> | 1790                         | <b>3385</b>   | 6037                       | <b>14361</b> |
| miR-7108-5p        |                              |               | 818                        | <b>1948</b>  |
| <u>miR-7-5p</u>    | 1109                         | <b>4222</b>   | 612                        | <b>1995</b>  |

<sup>1</sup> >2-fold difference: bold

<sup>2</sup> underlined: miRNA consistently regulated in SW948-cld7kd cells and TEX

Table S4D

miR recovered at high level in ASML-wt TEX compared to -cld7kd cells

| Name        | ASML-wt TEX  | -cld7kd cells <sup>1</sup> | Name        | ASML-wt TEX | -cld7kd cells <sup>1</sup> |
|-------------|--------------|----------------------------|-------------|-------------|----------------------------|
| miR-125b-5p | <u>46218</u> | <u>6457</u>                | miR-671     | 537         | 34                         |
| miR-1224    | <u>28131</u> | <u>3537</u>                | miR-3102    | 528         | 33                         |
| miR-466b-5p | <u>15829</u> | <u>206</u>                 | miR-330-3p  | 514         | 36                         |
| miR-23a-3p  | <u>7314</u>  | <u>2217</u>                | miR-451-5p  | 504         | 36                         |
| miR-547-5p  | <u>7072</u>  | <u>34</u>                  | miR-6216    | 497         | 208                        |
| miR-3473    | <u>4701</u>  | <u>449</u>                 | miR-30d-5p  | 488         | 100                        |
| miR-494-3p  | <u>4650</u>  | <u>255</u>                 | miR-99b-5p  | 452         | 202                        |
| miR-652-5p  | <u>3823</u>  | <u>1478</u>                | miR-206-3p  | 407         | 44                         |
| miR-347     | <u>3236</u>  | <u>105</u>                 | miR-1249    | 403         | 44                         |
| miR-183-5p  | <u>2870</u>  | <u>1041</u>                | miR-196c-3p | 397         | 82                         |
| miR-200c-3p | <u>2374</u>  | <u>120</u>                 | miR-551b-5p | 394         | 55                         |
| miR-381-3p  | <u>2123</u>  | <u>35</u>                  | miR-3573-3p | 382         | 49                         |
| miR-212-3p  | <u>2119</u>  | <u>255</u>                 | miR-328a-3p | 365         | 44                         |
| miR-324-3p  | <u>2008</u>  | <u>675</u>                 | miR-1839-3p | 340         | 66                         |
| miR-672-5p  | <u>1633</u>  | <u>164</u>                 | miR-3562    | 335         | 87                         |
| miR-188-5p  | <u>1409</u>  | <u>136</u>                 | miR-134-5p  | 334         | 81                         |
| miR-32-3p   | <u>1349</u>  | <u>46</u>                  | miR-3064-5p | 320         | 32                         |
| miR-483-5p  | <u>1236</u>  | <u>120</u>                 | miR-760-5p  | 320         | 33                         |
| miR-1896    | <u>1174</u>  | <u>90</u>                  | miR-423-5p  | 311         | 61                         |
| miR-300-3p  | 970          | 36                         | miR-770-3p  | 309         | 54                         |
| miR-211-3p  | 949          | 207                        | miR-328a-5p | 309         | 74                         |
| miR-1306-3p | 866          | 72                         | miR-3564    | 307         | 44                         |
| miR-466d    | 840          | 36                         | miR-139-3p  | 293         | 43                         |
| miR-327     | 785          | 41                         | miR-487b-3p | 282         | 47                         |
| miR-30c-5p  | 764          | 260                        | miR-296-5p  | 273         | 44                         |
| miR-3584-5p | 737          | 315                        | miR-598-3p  | 272         | 36                         |
| miR-365-3p  | 729          | 179                        | miR-331-3p  | 267         | 81                         |
| miR-465-5p  | 697          | 34                         | miR-3588    | 262         | 37                         |
| miR-466c-5p | 659          | 62                         | miR-539-5p  | 259         | 36                         |
| miR-125a-3p | 611          | 95                         | miR-202-3p  | 252         | 85                         |
| miR-150-3p  | 599          | 114                        | miR-297     | 251         | 33                         |
| miR-320-3p  | 587          | 74                         | miR-3085    | 246         | 41                         |
| miR-3593-3p | 587          | 117                        | miR-34b-5p  | 241         | 78                         |
| miR-762     | 570          | 137                        | miR-149-3p  | 232         | 56                         |

<sup>1</sup> miRNA with a signal strength >1000 and an >2-fold difference are underlined



Table S4E  
miR recovered at high level in SW948-wt TEX compared to -cld7kd cells

| Name        | SW948-wt<br>TEX | -cld7kd cells <sup>1</sup> | Name         | SW948-wt<br>TEX | -cld7kd cells <sup>1</sup> |
|-------------|-----------------|----------------------------|--------------|-----------------|----------------------------|
| miR-1290    | <u>47002</u>    | <u>181</u>                 | miR-221-3p   | 528             | 50                         |
| miR-6893-5p | <u>1021</u>     | <u>9</u>                   | miR-331-3p   | 525             | <b>50</b>                  |
| miR-451a    | <u>4534</u>     | <u>50</u>                  | miR-328-5p   | 516             | <b>50</b>                  |
| miR-1246    | <u>94418</u>    | <u>1176</u>                | miR-4655-5p  | 508             | 50                         |
| miR-8089    | <u>3934</u>     | <u>50</u>                  | miR-1225-5p  | <u>5940</u>     | <u>585</u>                 |
| miR-3934-5p | <u>2748</u>     | <u>50</u>                  | miR-6850-5p  | 504             | 50                         |
| miR-4455    | <u>2632</u>     | 50                         | miR-4739     | <u>1903</u>     | <u>190</u>                 |
| miR-22-3p   | <u>2267</u>     | 50                         | miR-584-5p   | 388             | 39                         |
| miR-630     | <u>2093</u>     | 48                         | miR-3679-5p  | <u>1324</u>     | <u>152</u>                 |
| miR-6085    | <u>2146</u>     | <u>50</u>                  | miR-4430     | 621             | 72                         |
| miR-574-5p  | <u>17605</u>    | <u>482</u>                 | miR-6891-5p  | <u>2456</u>     | <u>293</u>                 |
| miR-6753-5p | <u>1560</u>     | <u>50</u>                  | miR-4298     | 446             | 56                         |
| miR-31-5p   | <u>1477</u>     | <u>50</u>                  | miR-1268a    | <u>1735</u>     | <u>218</u>                 |
| miR-151a-5p | <u>1450</u>     | <u>50</u>                  | miR-4466     | <u>2114</u>     | <u>266</u>                 |
| miR-6076    | <u>1412</u>     | 50                         | miR-6090     | <u>15292</u>    | <u>1967</u>                |
| miR-7107-5p | <u>3301</u>     | <u>121</u>                 | miR-188-5p   | 942             | 142                        |
| miR-5703    | <u>1340</u>     | <u>50</u>                  | miR-4459     | <u>38879</u>    | <u>5944</u>                |
| let-7e-5p   | <u>1307</u>     | <b>50</b>                  | miR-4271     | 702             | 111                        |
| miR-4270    | <u>2723</u>     | <u>107</u>                 | miR-6803-5p  | <u>1071</u>     | <u>183</u>                 |
| miR-151b    | <u>1170</u>     | <u>50</u>                  | miR-2861     | <u>2110</u>     | <u>376</u>                 |
| miR-642b-3p | <u>1085</u>     | <u>50</u>                  | miR-6812-5p  | 480             | 90                         |
| miR-30d-5p  | 982             | 50                         | miR-210-3p   | <u>2916</u>     | <u>548</u>                 |
| miR-575     | 964             | 50                         | miR-320c     | <u>5777</u>     | <u>1180</u>                |
| miR-4534    | 451             | 24                         | miR-1287-5p  | 285             | 60                         |
| miR-135b-5p | 911             | <b>50</b>                  | miR-6879-5p  | <u>3696</u>     | <u>816</u>                 |
| miR-4788    | 879             | 50                         | miR-320e     | <u>6077</u>     | <u>1345</u>                |
| miR-6740-5p | 870             | 50                         | miR-4505     | <u>1413</u>     | <u>322</u>                 |
| miR-30e-5p  | 861             | 50                         | miR-1229-5p  | <u>1462</u>     | <u>337</u>                 |
| miR-374b-5p | 829             | <b>50</b>                  | miR-320d     | <u>7963</u>     | <u>1837</u>                |
| miR-7150    | <u>5748</u>     | <u>350</u>                 | miR-1275     | <u>1096</u>     | <u>254</u>                 |
| miR-4763-3p | <u>3043</u>     | <u>188</u>                 | miR-6821-5p  | <u>4020</u>     | <u>957</u>                 |
| miR-6728-5p | 803             | 50                         | miR-6724-5p  | 745             | 182                        |
| miR-6510-5p | 801             | 50                         | miR-23a-3p   | <u>4279</u>     | <u>1072</u>                |
| miR-183-5p  | 800             | <b>50</b>                  | miR-6756-5p  | 476             | 122                        |
| miR-134-5p  | 791             | <b>50</b>                  | miR-4516     | <u>11330</u>    | <u>2897</u>                |
| miR-5787    | <u>7396</u>     | <u>493</u>                 | miR-197-5p   | <u>2291</u>     | <u>587</u>                 |
| miR-6786-5p | 742             | 50                         | miR-638      | <u>2397</u>     | <u>619</u>                 |
| miR-4281    | <u>12709</u>    | <u>854</u>                 | miR-4741     | 859             | 232                        |
| miR-3135b   | 726             | 50                         | miR-4442     | 933             | 255                        |
| miR-1207-5p | <u>4893</u>     | <u>344</u>                 | miR-4530     | <u>7089</u>     | <u>1976</u>                |
| miR-8072    | 704             | 50                         | miR-3960     | <u>17064</u>    | <u>4806</u>                |
| miR-4507    | 672             | 50                         | miR-4443     | 1280            | 375                        |
| miR-222-3p  | 667             | 50                         | miR-7704     | <u>1934</u>     | <u>656</u>                 |
| miR-4685-5p | 371             | 29                         | miR-6769b-5p | 757             | 274                        |
| miR-6829-5p | <u>3342</u>     | <u>260</u>                 | miR-8069     | <u>19048</u>    | <u>6909</u>                |
| miR-6088    | <u>5617</u>     | <u>439</u>                 | miR-10a-5p   | <u>14495</u>    | <u>5304</u>                |
| miR-4687-3p | <u>4650</u>     | <u>368</u>                 | miR-1202     | <u>5255</u>     | <u>1986</u>                |
| miR-6794-5p | 624             | 50                         | miR-6125     | <u>3998</u>     | <u>1520</u>                |
| miR-6752-5p | 619             | 50                         | miR-6087     | <u>14591</u>    | <u>5624</u>                |
| miR-3195    | 605             | 50                         | miR-200a-3p  | <u>5483</u>     | <u>2125</u>                |
| miR-4306    | 604             | 50                         | miR-3665     | <u>1728</u>     | <u>711</u>                 |
| miR-150-3p  | 602             | <b>50</b>                  | miR-4299     | <u>3193</u>     | <u>1316</u>                |
| miR-7110-5p | <u>2858</u>     | <u>238</u>                 | miR-6800-5p  | <u>2673</u>     | <u>1158</u>                |
| miR-6820-5p | 600             | 50                         | miR-3196     | 842             | 369                        |
| miR-2392    | 578             | 50                         | miR-320b     | <u>4092</u>     | <u>1837</u>                |
| miR-6727-5p | 575             | 50                         | miR-642a-3p  | <u>6723</u>     | <u>3214</u>                |
| miR-3656    | <u>1796</u>     | <u>158</u>                 | miR-6826-5p  | <u>6563</u>     | <u>3192</u>                |
| miR-203a-3p | 555             | 50                         | miR-7108-5p  | 818             | 399                        |
| miR-30c-5p  | 554             | 50                         | miR-1915-3p  | <u>1863</u>     | <u>923</u>                 |

<sup>1</sup> miRNA with a signal strength >1000 and an >2-fold difference are underlined

Table S5  
**Reagents**  
Table S5A  
**Antibodies**

| <u>Antibody</u>                                               | <u>origin</u> | <u>supplier</u>                     |
|---------------------------------------------------------------|---------------|-------------------------------------|
| Actin                                                         | mouse         | Becton Dickinson, HD, G             |
| hCD104                                                        | rabbit        | Becton Dickinson, HD, G             |
| rCD104 (B5.5)                                                 | mouse         | (1) <sup>1</sup>                    |
| hCD133                                                        | rabbit        | Becton Dickinson, HD, G             |
| hCD166                                                        | mouse         | Becton Dickinson, HD, G             |
| rCD166                                                        | mouse         | Becton Dickinson, HD, G             |
| hCD29                                                         | mouse         | Becton Dickinson, HD, G             |
| rCD29                                                         | mouse         | Becton Dickinson, HD, G             |
| hCD44v6 (vFF18)                                               | mouse         | (2)                                 |
| rCD44v6 (A2.6)                                                | mouse         | (1)                                 |
| hCD49c                                                        | mouse         | Becton Dickinson, HD, G             |
| hCD49f                                                        | mouse         | Becton Dickinson, HD, G             |
| rCD49f                                                        | mouse         | Becton Dickinson, HD, G             |
| hCD9                                                          | mouse         | Becton Dickinson, HD, G             |
| rCD9 (B2C11)                                                  | mouse         | ATCC <sup>2</sup>                   |
| cld7                                                          | guinea pig    | (3)                                 |
| hEGFR                                                         | mouse         | BioTrend, Cologne, G                |
| hEpC (HEA125)                                                 | mouse         | (4)                                 |
| rEpCAM (D5.7)                                                 | mouse         | (1)                                 |
| ezrin                                                         | rabbit        | Becton Dickinson, HD, G             |
| JUP                                                           | rabbit        | Abcam, Cambridge, England           |
| hJAM                                                          | mouse         | Becton Dickinson, HD, G             |
| MFG8                                                          | rabbit        | Abcam, Cambridge, England           |
| K-ras                                                         | mouse         | SantaCruz, HD, G                    |
| Src                                                           | rabbit        | Santa Cruz, HD, G                   |
| hTspan8 (CO029)                                               | mouse         | (5)                                 |
| rTspan8 (D6.1)                                                | mouse         | (1)                                 |
| dye- or biotin-labeled secondary antibodies /<br>Streptavidin |               | Dianova, Becton Dickinson, Amersham |

<sup>1</sup> References

1. Matzku, S., Wenzel, A., Liu, S., et al. (1989). Antigenic differences between metastatic and nonmetastatic BSp73 rat tumor variants characterized by monoclonal antibodies. *Cancer Res.* 49, 1294-1299.
2. Seiter, S., Schadendorf, D., Herrmann, K., et al. (1996). Expression of CD44 variant isoforms in malignant melanoma. *Clin. Cancer Res.* 2, 447-456.
3. Ladwein, M., Pape, U.F., Schmidt, D.S., et al. (2005). The cell-cell adhesion molecule EpCAM interacts directly with the tight junction protein claudin-7. *Exp. Cell Res.* 309, 345-357.
4. Momburg, F., Moldenhauer, G., Hämmerling, G.J., et al. (1987). Immunohistochemical study of the expression of a Mr 34,000 human epithelium-specific surface glycoprotein in normal and malignant tissues. *Cancer Res.* 47, 2883-2891.
5. Sela, B.A., Steplewski, Z., and Koprowski, H. (1989). Colon carcinoma-associated glycoproteins recognized by monoclonal antibodies CO-029 and GA22-2. *Hybridoma* 8, 481-491.

<sup>2</sup> ATCC: American Type Cell Culture Collection

Table S5B  
Primers

|                          |                                                     |
|--------------------------|-----------------------------------------------------|
| rno-let-7a-5p SL         | GTTGGCTCTGGTGCAGGGTCCGAGGTATTCGCACCAGAGCCAAC AACTAT |
| rno-let-7a-5p fw         | TGTGTTGTGAGGTAGTAGGTTGT                             |
| rno-miR-125b-5p SL       | GTTGGCTCTGGTGCAGGGTCCGAGGTATTCGCACCAGAGCCAAC TCACAA |
| rno-miR-125b-5p fw       | TGTGTTCCCTGAGACCCTAAC                               |
| rno-miR-347 SL           | GTTGGCTCTGGTGCAGGGTCCGAGGTATTCGCACCAGAGCCAAC TGGGCG |
| rno-miR-347 fw           | GTGTGTGTCCCTCTGGGT                                  |
| rno-mir-125b-5p SL       | GTTGGCTCTGGTGCAGGGTCCGAGGTATTCGCACCAGAGCCAAC TCACAA |
| rno-mir-125b-5p fw       | TGTGTTCCCTGAGACCCTAAC                               |
| rno-miR-21-5p SL         | GTTGGCTCTGGTGCAGGGTCCGAGGTATTCGCACCAGAGCCAAC TCAACA |
| rno -miR-21-5p fw        | TGGTTTGGTAGCTTATCAGACTGA                            |
| rno-miR-16-5p SL         | GTTGGCTCTGGTGCAGGGTCCGAGGTATTCGCACCAGAGCCAAC CGCCAA |
| rno-miR-16-5p fw         | GTTTGGTAGCAGCACGTAATA                               |
| rno-mir-1224 SL          | GTTGGCTCTGGTGCAGGGTCCGAGGTATTCGCACCAGAGCCAAC CTCCAC |
| rno-mir-1224 fw          | TTGGTGAGGACTGGGGAG                                  |
| rno-miR-24-3p SL         | GTTGGCTCTGGTGCAGGGTCCGAGGTATTCGCACCAGAGCCAAC CTGTTC |
| rno-miR-24-3p fw         | GGTGTGGCTCAGTTCAGC                                  |
| rno-miR-652-5p SL        | ACAACCCUAGGAGGGGGUGCCAU                             |
| rno-miR-652-5p fw        | GGTGACAACCCTAGGAGGG                                 |
| rno-miR-1224 fw          | CTATGTGAGGACTGGGGAGG                                |
| rno-miR-1224 SL          | GTTGGCTCTGGTGCAGGGTCCGAGGTATTCGCACCAGAGCCAACCTCCAC  |
| rno-mir-466b-5p SL       | GTTGGCTCTGGTGCAGGGTCCGAGGTATTCGCACCAGAGCCAAC CATGGA |
| rno-mir-466b-5p fw       | GTTTGGTATGTGTGTGTGTATG                              |
| rno-mir-324-3p SL        | GTTGGCTCTGGTGCAGGGTCCGAGGTATTCGCACCAGAGCCAAC CCAGCA |
| rno-mir-324-3p fw        | TTGTCCACTGCCCCAGGT                                  |
| rno-mir-547-5p SL        | GTTGGCTCTGGTGCAGGGTCCGAGGTATTCGCACCAGAGCCAAC TGGGTG |
| rno-mir-547-5p fw        | GGGTCACCTCAGGATGTAC                                 |
| hsa-mir-1246 SL          | GTTGGCTCTGGTGCAGGGTCCGAGGTATTCGCACCAGAGCCAAC CCTGCT |
| hsa-mir-1246 fw          | GGGGGGGAATGGATTTTTGG                                |
| hsa-mir-1290 SL          | GTTGGCTCTGGTGCAGGGTCCGAGGTATTCGCACCAGAGCCAAC TCCCTG |
| hsa-mir-1290 fw          | GGGGGGTGGATTTTTGGAT                                 |
| hsa-mir-451a SL          | GTTGGCTCTGGTGCAGGGTCCGAGGTATTCGCACCAGAGCCAAC AACTCA |
| hsa-mir-451a fw          | GTTTGGAAACCGTTACCATTAC                              |
| hsa-mir-4270 SL          | GTTGGCTCTGGTGCAGGGTCCGAGGTATTCGCACCAGAGCCAAC GCCCTC |
| hsa-mir-4270 fw          | TTGGTCAGGGAGTCAGGG                                  |
| hsa-mir-574-5p SL        | GTTGGCTCTGGTGCAGGGTCCGAGGTATTCGCACCAGAGCCAAC ACACAC |
| hsa-mir-574-5p fw        | GGTGAGTGTGTGTGTGTGA                                 |
| Universal reverse primer | GTGCAGGGTCCGAGGT                                    |

Table S6

**Full names of synonyms**

| <b>Synonym</b>   | <b>Full name</b>                                            |
|------------------|-------------------------------------------------------------|
| A0A0G2K0V8       | Nuclear migration protein nudC like                         |
| A2M              | Alpha-2-macroglobulin                                       |
| AARS             | Alanine--tRNA ligase                                        |
| Abcb7            | ATP-binding cassette sub-family B member 7                  |
| ABCC3            | Canalicular multispecific organic anion transporter 2       |
| ABCE1            | ATP-binding cassette sub-family E member 1                  |
| ABCE1 / D3ZD23   | ATP binding cassette subfamily E member 1                   |
| ACE              | Angiotensin-converting enzyme                               |
| ACO2             | Aconitate hydratase, mitochondrial                          |
| ACOT7            | Acyl-CoA thioesterase 7                                     |
| ACOT8            | Acyl-CoA thioesterase 8                                     |
| ACP2             | Lysosomal acid phosphatase                                  |
| ACSL3            | Long-chain-fatty-acid--CoA ligase 3                         |
| ACTB             | Actin, cytoplasmic                                          |
| ACTBL2           | Actin, beta-like 2                                          |
| ACTC1            | Actin, alpha cardiac muscle 1                               |
| ACTL6A           | Actin-like protein 6A                                       |
| ACTN1            | alpha-actinin-1                                             |
| ACTN2            | Alpha-actinin-2                                             |
| ACTN4            | Alpha-actinin 4                                             |
| ACTR1A           | ARP1 actin related protein 1 homolog A                      |
| ACTR1B           | ARP1 actin related protein 1 homolog B                      |
| ACTR2            | Actin-related protein 2                                     |
| ADA              | Adenosine deaminase                                         |
| ADAM10           | Disintegrin and metalloproteinase domain-containing prot.10 |
| Adam17           | Disintegrin and metalloproteinase domain-containing prot.17 |
| ADAM9            | Disintegrin and metalloproteinase domain-containing prot.9  |
| ADD1             | Alpha-adducin                                               |
| ADH1             | Alcohol dehydrogenase class-1                               |
| ADH3             | Alcohol dehydrogenase class-3                               |
| ADH5             | Alcohol dehydrogenase class-5                               |
| AHCY             | Adenosylhomocysteinase                                      |
| AHCYL2           | Adenosylhomocysteinase like 2                               |
| AHNAK            | Neuroblast differentiation-associated protein AHNAK         |
| AHSG             | Alpha-2-HS-glycoprotein                                     |
| A1314180 / ECPAS | Ecm29 proteasome adaptor and scaffold                       |
| AIFM1            | Apoptosis-inducing factor                                   |
| AIP              | AH receptor-interacting protein                             |
| AK1              | Adenylate kinase isoenzyme 1                                |
| AKAP8            | A-kinase anchoring protein8                                 |
| AKAP9            | A-kinase anchoring protein9                                 |
| AKR1A1           | Alcohol dehydrogenase [NADP(+)]                             |
| AKR1B1           | Aldose reductase                                            |
| AKR1B8           | Aldose reductase-related protein 1                          |
| AKR1C1           | Aldo-keto reductase family 1 member C1                      |
| AKR1C12I1        | Aldo-keto reductase family 1, C12-like 1                    |
| AKR1C2           | Aldo-keto reductase family 1 member C2                      |
| AKR1C3           | Aldo-keto reductase family 1 member C3                      |
| AKR2             | Ankyrin repeat-containing protein2                          |
| AKR7A2           | Aldo-keto reductase family 7 member A2                      |
| ALB              | Serum albumin                                               |
| ALDH2            | Alldehyde dehydrogenase 2 family member                     |
| ALDOA            | Fructose-bisphosphate aldolase A                            |
| ALDOC            | Fructose-bisphosphate aldolase C                            |
| ANKFY1           | Rabankyrin-5                                                |
| ANLN1            | anillin, actin binding protein-like 1                       |
| ANXA1            | Annexin A1                                                  |
| ANXA11           | Annexin A11                                                 |
| ANXA2            | Annexin A2                                                  |
| ANXA3            | annexin A3                                                  |
| ANXA5            | Annexin A5                                                  |
| ANXA6            | Annexin A6                                                  |
| ANXA6            | Annexin A6                                                  |
| ANXA7            | Annexin A7                                                  |
| AOC1             | Amiloride-sensitive amine oxidase                           |
| AP1B1            | AP-1 complex subunit beta-1                                 |
| AP2A1            | AP-2 complex subunit alpha-1                                |
| AP2A2            | AP-2 complex subunit alpha-2                                |
| AP2B1            | AP-2 complex subunit beta                                   |
| AP2M1            | AP-2 complex subunit mu                                     |
| AP2S1            | AP-2 complex subunit sigma                                  |
| AP3B1            | AP-3 complex subunit beta-1                                 |
| APEH             | Acylamino-acid-releasing enzyme                             |
| APEX1            | DNA-(apurinic or apyrimidinic site) lyase                   |
| APOB             | Apolipoprotein B-100                                        |
| APRT             | Adenine phosphoribosyltransferase                           |
| AQP4             | Aquaporin 4                                                 |
| ARCN1            | Archain 1                                                   |

Table S6 continued

| <b>Synonym</b> | <b>Full name</b>                                                                     |
|----------------|--------------------------------------------------------------------------------------|
| AREG           | Amphiregulin                                                                         |
| ARF3           | ADP-ribosylation factor 3                                                            |
| ARF4           | ADP-ribosylation factor 4                                                            |
| ARF5           | ADP-ribosylation factor 5                                                            |
| ARFIP1         | ADP-ribosylation factor interacting protein 1                                        |
| ARHGDI1A       | Rho GDP dissociation inhibitor alpha                                                 |
| ARID1A         | AT-rich interaction domain 1A                                                        |
| ARL8A          | ADP-ribosylation factor-like protein 8A                                              |
| ARMC10         | Armadillo repeat-containing protein 10                                               |
| ARPC1B         | Actin-related protein 2/3 complex subunit 1B                                         |
| ARPC3          | Actin-related protein 2/3 complex subunit 3                                          |
| ARRDC1         | Arrestin domain-containing protein 1                                                 |
| ASAP1          | Arf-GAP with SH3 domain, ANK repeat and PH domain-cont. protein 1                    |
| ASCL4          | acyl-CoA synthetase long chain family memb. 4                                        |
| ASCT2          | Alanine/serine/cysteine/threonine transporter 2                                      |
| ASL            | Argininosuccinate lyase                                                              |
| ASNS           | Asparagine synthase                                                                  |
| ASS1           | Argininosuccinate synthase                                                           |
| ATIC           | 5-aminoimidazole-4-carboxamide ribonucleotide formyltransferase/IMP cyclohydrolase   |
| ATP1A3         | Sodium/potassium-transporting ATPase subunit alpha-3                                 |
| ATP1B1         | Sodium/potassium-transporting ATPase subunit beta-1                                  |
| ATP1B2         | ATPase, Na <sup>+</sup> /K <sup>+</sup> transporting, beta 2 polypeptide             |
| ATP2A2         | Sarcoplasmic/endoplasmic reticulum calcium ATPase 2                                  |
| ATP2B4         | Plasma membrane calcium-transporting ATPase 4                                        |
| ATP5A1         | ATP synthase, H <sup>+</sup> transporting, mitochondrial F1 complex, alpha subunit 1 |
| ATP5B          | ATP synthase subunit beta                                                            |
| ATP5EP2        | ATP synthase subunit epsilon-like protein, mitochondrial                             |
| ATP5L          | ATP synthase subunit g, mitochondrial                                                |
| ATP5S          | ATP synthase, H <sup>+</sup> transporting, mitochondrial Fo complex subunit s        |
| ATP6AP2        | Renin receptor                                                                       |
| ATP6V0D1       | V-type proton ATPase subunit d 1                                                     |
| ATP6V1B2       | V-type proton ATPase subunit B, brain isoform                                        |
| ATP6V1D        | V-type proton ATPase subunit D                                                       |
| ATXN10         | Ataxin-10                                                                            |
| BANF1          | barrier to autointegration factor 1                                                  |
| BCL2L1         | BCL2 like 1                                                                          |
| BET1           | Bet1 golgi vesicular membrane trafficking protein                                    |
| BET1L          | BET1-like protein                                                                    |
| BIRC6          | baculoviral IAP repeat containing 6                                                  |
| BMP4           | Bone morphogenetic protein 4                                                         |
| BMP7           | Bone morphogenetic protein 7                                                         |
| BROX           | BRO1 domain-containing protein BROX                                                  |
| BUD31          | BUD31 homolog                                                                        |
| BZW1           | basic leucine zipper and W2 domains 1                                                |
| BZW2           | basic leucine zipper and W2 domains 2                                                |
| C12orf10       | Chromosome C12 orf10                                                                 |
| C3             | Complement C3                                                                        |
| C4             | Complement C4                                                                        |
| C9orf64        | UPF0553 protein C9orf64                                                              |
| CAD            | DNA fragmentation factor subunit beta                                                |
| CAND1          | Cullin-associated NEDD8-dissociated protein 1                                        |
| CAP1           | Cyclase associated actin cytoskeleton regulatory protein 1                           |
| CAPN1          | Calpain-1 catalytic subunit                                                          |
| CAPN5          | Calpain-5                                                                            |
| CAPNS1         | Calpain small subunit 1                                                              |
| CARKD / NAXD   | NAD(P)HX dehydratase                                                                 |
| CASK           | Peripheral plasma membrane protein CASK                                              |
| CASP3          | Caspase 3                                                                            |
| CAV2           | Caveolin2                                                                            |
| CBR4           | Carbonic reductase 4                                                                 |
| CCDC132        | Syndetin                                                                             |
| CCND1          | Cyclin D1                                                                            |
| CCS            | Copper chaperone for superoxide dismutase                                            |
| CCT2           | T-complex protein 1 subunit beta                                                     |
| CCT3           | T-complex protein 1 subunit gamma                                                    |
| CCT4           | T-complex protein 1 subunit delta                                                    |
| CCT5           | T-complex protein 1 subunit epsilon                                                  |
| CCT6a          | Chaperonin containing Tcp1, subunit 6A                                               |
| CCT7           | T-complex protein 1 subunit eta                                                      |
| CCT8           | Chaperonin subunit theta                                                             |
| CD151          | Tetraspanin CD151                                                                    |
| CD166          | CD166 antigen ALCAM                                                                  |
| CD276          | CD276 antigen                                                                        |
| CD46           | CD46 molecule                                                                        |
| CD55           | Complement decay-accelerating factor                                                 |
| CD59           | CD59 (blood group) molecule                                                          |
| CD63           | Tetraspanin CD63                                                                     |
| CD81           | Tetraspanin CD81                                                                     |
| CD82           | Tetraspanin CD82                                                                     |
| CD9            | Tetraspanin CD9                                                                      |
| CD97           | CD97 antigen                                                                         |

Table S6 continued

| <b>Synonym</b> | <b>Full name</b>                                               |
|----------------|----------------------------------------------------------------|
| CDH1           | Cadherin-1                                                     |
| CDHR1          | Cadherin related family member 1                               |
| CDK1           | Cyclin-dependent kinase 1                                      |
| CDKN2A         | Cyclin dependent kinase inhibitor 2A                           |
| CDS1           | CDP-diacylglycerol synthase 1                                  |
| CEMIP          | Cell migration-inducing and hyaluronan-binding protein         |
| CFL1           | Cofilin-1                                                      |
| CFL2           | Cofilin-2                                                      |
| CHD4           | Chromodomain helicase DNA binding protein4                     |
| CHMP1B         | Charged multivesicular body protein 1b                         |
| CHMP2A         | Charged multivesicular body protein 2a                         |
| CHMP2B         | Charged multivesicular body protein 2b                         |
| CHMP3          | Charged multivesicular body protein 3                          |
| CHMP5          | Charged multivesicular body protein 5                          |
| CIB1           | Calcium and integrin-binding protein 1                         |
| CIT            | Citron Rho-interacting kinase                                  |
| CKB            | Creatine kinase B-type                                         |
| CLD2           | Claudin-2                                                      |
| CLDN1          | Claudin domain-containing protein 1                            |
| CLDN2          | Claudin-2                                                      |
| CLDN3          | Claudin-3                                                      |
| CLDN4          | Claudin-4                                                      |
| CLDN7          | Claudin-7                                                      |
| CLDN9          | Claudin-9                                                      |
| CLIC1          | Chloride intracellular channel protein 1                       |
| CLIP2          | Chloride intracellular channel protein 2                       |
| CLTA           | Clathrin light chain A                                         |
| CLTC           | Clathrin heavy chain                                           |
| CLU            | Clusterin                                                      |
| CNN2           | Calponin-2                                                     |
| CNOT1          | CCR4-NOT transcription complex subunit 1                       |
| CNPY3          | canopy FGF signaling regulator 3                               |
| COASY          | Bifunctional coenzyme A synthase                               |
| COL18A1        | Procollagen, type XVIII, alpha 1                               |
| COMT           | catechol-O-methyltransferase                                   |
| COPA           | Coatomer subunit alpha                                         |
| COPB2          | Coatomer subunit beta 2                                        |
| COPE           | Coatomer subunit epsilon                                       |
| COPS3          | COP9 signalosome complex subunit 3                             |
| COPS4          | COP9 signalosome complex subunit 4                             |
| COPS5          | COP9 signalosome complex subunit 5                             |
| COPS6          | COP9 signalosome complex subunit 6                             |
| CORO1C         | Coronin 1C                                                     |
| COTL1          | Coactosin-like protein                                         |
| CPSF7          | cleavage and polyadenylation specific factor 7                 |
| CSD1           | copper/zinc superoxide dismutase 1                             |
| CSE1           | exportin-2                                                     |
| CSKP           | Peripheral plasma membrane protein CASK CASK                   |
| CSNK1A1        | Casein kinase I isoform alpha                                  |
| CSNK2B         | Casein kinase II subunit beta                                  |
| CTNNB1         | Catenin beta-1                                                 |
| CTNND1         | Catenin delta-1                                                |
| CTPS1          | CTP synthase 1                                                 |
| CTSZ           | Cathepsin Z                                                    |
| CUL1           | Cullin-1                                                       |
| CUL3           | Cullin-3                                                       |
| CUL4A          | Cullin-4A                                                      |
| CXADR          | Coxsackievirus and adenovirus receptor                         |
| CYB5R3         | Cytochrome B5 reductase 3                                      |
| CYP51A1        | Lanosterol 14-alpha demethylase                                |
| DAZAP1         | DAZ associated protein 1                                       |
| DCPS           | decapping enzyme, scavenger                                    |
| DCTD           | Deoxycytidylate deaminase                                      |
| DCTN1          | Dynactin subunit 1                                             |
| DCTN3          | Dynactin subunit 3                                             |
| DDAH2          | N(G),N(G)-dimethylarginine dimethylaminohydrolase 2            |
| Ddb1           | Damage specific DNA binding protein 1                          |
| DDOST          | Dolichyl-diphosphooligosaccharide--protein glycosyltransferase |
| DDX1           | DEAD-box helicase 1                                            |
| DDX17          | Probable ATP-dependent RNA helicase DDX17                      |
| Ddx39a         | Spliceosome RNA helicase DDX39A                                |
| DDX39B         | Spliceosome RNA helicase DDX39B                                |
| DDX5           | Probable ATP-dependent RNA helicase DDX5                       |
| DERA           | Deoxyribose-phosphate aldolase                                 |
| DHX9           | ATP-dependent RNA helicase A                                   |
| DIE            | Insulin-degrading enzyme                                       |
| DIP2A          | Disco-interacting protein 2 homolog A                          |
| DIP2B          | Disco-interacting protein 2 homolog B                          |
| DIP2C          | Disco-interacting protein 2 homolog C                          |
| DLG1           | Disks large homolog 1                                          |

Table S6 continued

| <b>Synonym</b> | <b>Full name</b>                                                   |
|----------------|--------------------------------------------------------------------|
| DNAJ9          | DnaJ homolog subfamily C member 9                                  |
| DNAJA1         | DnaJ homolog subfamily A member 1                                  |
| DNAJB1         | DnaJ homolog subfamily B member 1                                  |
| DNAJB9         | DnaJ homolog subfamily B member 9                                  |
| DNAJC13        | DnaJ homolog subfamily C member 13                                 |
| DNAJC2         | DnaJ homolog subfamily C member 2                                  |
| DNM1L          | Dynammin-1-like protein                                            |
| DNM2           | Dynammin-2                                                         |
| DNMT1          | DNA methyltransferase                                              |
| DNPEP          | Aspartyl aminopeptidase                                            |
| DNP1H          | 2'-deoxynucleoside 5'-phosphate N-hydrolase 1                      |
| DPEP1          | Dipeptidase 1                                                      |
| DPP4           | Dipeptidyl peptidase 4                                             |
| DPP7           | Dipeptidyl peptidase 2                                             |
| DRG2           | Developmentally regulated GTP binding protein 2                    |
| DSG2           | Desmoglein-2                                                       |
| DSTN           | Destrin                                                            |
| DTD1           | D-tyrosyl-tRNA deacylase 1                                         |
| DUSP3          | Dual specificity phosphatase 3                                     |
| DUT            | Deoxyuridine 5'-triphosphate nucleotidohydrolase, mitochondrial    |
| DYNC1H1        | dynein cytoplasmic 1 heavy chain 1                                 |
| DYNC1I2        | dynein cytoplasmic 1 intermediate chain 2                          |
| DYNLL1         | Dynein light chainLC8-type 1                                       |
| DYNLL2         | Dynein light chain 2, cytoplasmic                                  |
| DYNLT1         | Dynein light chain Tctex-type 1                                    |
| ECHDC1         | ethylmalonyl-CoA decarboxylase 1                                   |
| ECM29          | Proteasome-associated protein ECM29 homolog                        |
| EEF1A1         | Elongation factor 1-alpha 1                                        |
| EEF1D          | Elongation factor 1-delta                                          |
| EEF1E1         | eukaryotic translation elongation factor 1 epsilon 1               |
| EFL1           | Elongation factor-like GTPase 1                                    |
| EFNB1          | Ephrin-B1                                                          |
| EFNB2          | Ephrin-B2                                                          |
| EGFR           | Epidermal growth factor receptor                                   |
| EHD1           | EH domain-containing protein 1                                     |
| EHD3           | EH domain-containing protein 3                                     |
| EHD4           | EH domain-containing protein 4                                     |
| EIF1AX         | Eukaryotic translation initiation factor 1A, X-chromosomal         |
| EIF2S1         | Eukaryotic translation initiation factor 2 subunit 1               |
| EIF2S3         | Eukaryotic translate. initiation factor2 subunit 3                 |
| EIF2S3X        | eukaryotic translation initiation factor 2, subunit 3              |
| EIF3A          | Eukaryotic translation initiation factor 3 subunit A               |
| EIF3B          | Eukaryotic translation initiation factor 3 subunit B               |
| EIF3C          | Eukaryotic translation initiation factor 3 subunit C               |
| EIF3D          | Eukaryotic translation initiation factor 3 subunit D               |
| EIF3E          | Eukaryotic translation initiation factor 3 subunit E               |
| EIF3F          | Eukaryotic translation initiation factor 3 subunit F               |
| EIF3H          | Eukaryotic translation initiation factor 3 subunit H               |
| EIF3I          | Eukaryotic translation initiation factor 3 subunit I               |
| EIF3K          | Eukaryotic translation initiation factor 3 subunit K               |
| EIF3L          | Eukaryotic translation initiation factor 3 subunit L               |
| EIF3M          | Eukaryotic translation initiation factor 3 subunit M               |
| EIF3T          | eukaryotic translation initiat. factor 3, subunit 10 theta         |
| EIF4A2         | Eukaryotic initiation factor 4A-II                                 |
| EIF4E          | Eukaryotic translation initiation factor 4E                        |
| EIF4E2         | Eukaryotic translation initiation factor 4E type 2                 |
| EIF4G1         | Eukaryotic translation initiation factor 4G 1                      |
| EIF5A          | Eukaryotic translation initiation factor 5A                        |
| ELAVL1         | ELAV like RNA binding protein 1                                    |
| EMB            | Embigin                                                            |
| ENO1           | Enolase 1                                                          |
| ENO2           | Enolase gamma                                                      |
| ENO3           | Enolase beta                                                       |
| EPB41L1        | Band 4.1-like protein 1                                            |
| EPCAM          | Epithelial cell adhesion molecule                                  |
| EPHA2          | Ephrin type-A receptor 2                                           |
| EPHB2          | Ephrin type-B receptor 2                                           |
| EPHB3          | Ephrin type-B receptor 3                                           |
| EPHB4          | Ephrin type-B receptor 4                                           |
| EPHX1          | Epoxide hydrolase 1                                                |
| EPRS           | Bifunctional glutamate/proline--tRNA ligase                        |
| EPS8L3         | Epidermal growth factor receptor kinase substrate 8-like protein 3 |
| ERH            | Enhancer of rudimentary homolog                                    |
| ERLIN2         | Erlin-2                                                            |
| ERMP1          | Endoplasmic reticulum metallopeptidase 1                           |
| ERO1A          | ERO1-like protein alpha                                            |
| ERP29          | Endoplasmic reticulum protein 29                                   |
| ESYT1          | extended synaptotagmin 1                                           |
| EZR            | Ezrin                                                              |
| F2             | Prothrombin                                                        |
| F5             | Coagulation factor V                                               |

Table S6 continued

| <b>Synonym</b> | <b>Full name</b>                                                 |
|----------------|------------------------------------------------------------------|
| FABP5          | Fatty acid binding protein 5                                     |
| FAM120A        | Constitutive coactivator of PPAR-gamma-like protein 1            |
| FAM175B        | family with sequence similarity 175 member B                     |
| FAM213A        | family with sequence similarity 213, member A                    |
| FAM3C          | family with sequence similarity 3 member C                       |
| FAM49B         | family with sequence similarity 49 member B                      |
| FANCD2         | Fanconi anemia group D2 protein homolog                          |
| FANCI          | Fanconi anemia group I protein                                   |
| FAR1           | Fatty acyl-CoA reductase 1                                       |
| FARP1          | FERM, RhoGEF and pleckstrin domain-containing protein 1          |
| FARP2          | FERM, RhoGEF and pleckstrin domain-containing protein 2          |
| FARSA          | Phenylalanine--tRNA ligase alpha subunit                         |
| FARSB          | Phenylalanine--tRNA ligase beta subunit                          |
| FASN           | Fatty acid synthase                                              |
| FAT1           | Protocadherin Fat 1                                              |
| FBXO6          | F-box protein 6                                                  |
| FDPS           | farnesyl diphosphate synthase                                    |
| FGB            | fibrinogen beta chain                                            |
| FKBP4          | Peptidyl-prolyl cis-trans isomerase FKBP4                        |
| FLII           | flightless-1 homolog                                             |
| FLNA           | Filamin-A                                                        |
| FLNB           | Filamin-B                                                        |
| FLNC           | Filamin-C                                                        |
| FLOT1          | Flotillin-1                                                      |
| FLOT2          | Flotillin-2                                                      |
| FN1            | Fibronectin                                                      |
| FPRP           | Prostaglandin F2 receptor negative regulator                     |
| FRIL           | Ferritin light chain FTL                                         |
| FSCN1          | Fascin                                                           |
| FBP3           | Ferritin heavy chain                                             |
| FTL1           | Ferritin light chain 1                                           |
| FUBP3          | Far upstream element-binding protein 3                           |
| FYN            | Tyrosine-protein kinase Fyn                                      |
| FZD3           | Frizzled class receptor 3                                        |
| G6PC           | Glucose-6-phosphatase                                            |
| G6PD           | glucose-6-phosphate dehydrogenase                                |
| GAA            | Lysosomal alpha-glucosidase                                      |
| GAPDH          | Glyceraldehyde-3-phosphate dehydrogenase                         |
| GAPVD1         | GTPase-activating protein and VPS9 domain-containing protein 1   |
| GARS           | Glycine--tRNA ligase                                             |
| GART           | Phosphoribosylglycinamide formyltransferase                      |
| GC             | Vitamin D-binding protein                                        |
| GCA            | Grancalcin                                                       |
| GCC2           | GRIP and coiled-coil domain containing 2                         |
| GCN1(LL1)      | GCN1, eIF2 alpha kinase activator homolog                        |
| GDA            | Guanine deaminase                                                |
| GDI1           | Rab GDP dissociation inhibitor alpha                             |
| GFPT2          | Glutamine--fructose-6-phosphate aminotransferase [isomerizing] 2 |
| GGH            | Gamma-glutamyl hydrolase                                         |
| GGT1           | gamma-glutamyl transpeptidase                                    |
| GHITM          | Growth hormone-inducible transmembrane protein                   |
| GLB1           | Beta-galactosidase                                               |
| GLG1           | Golgi apparatus protein 1                                        |
| GLS            | Glutaminase kidney isoform                                       |
| GMPS           | guanine monophosphate synthase                                   |
| GNA11          | Guanine nucleotide-binding protein subunit alpha-11              |
| GNA13          | Guanine nucleotide-binding protein G(k) subunit alpha            |
| GNAS           | Guanine nucleotide-binding protein G(s) subunit alpha XLas       |
| GNB1           | Guanine nucleotide-binding protein G(l)/G(s)/G(t) subu. beta1    |
| GNB2           | Guanine nucleotide-binding protein G(l)/G(s)/G(t) subu. beta-2   |
| GNB4           | Guanine nucleotide-binding protein subunit beta-4                |
| GNG5           | G protein subunit gamma 5                                        |
| GOLGA4         | Golgin subfamily A member 4                                      |
| GOLGA7         | Golgin subfamily A member 7                                      |
| GOLGB1         | Golgin subfamily B member 1                                      |
| GOT2           | Aspartate aminotransferase                                       |
| GPA33          | Cell surface A33 antigen                                         |
| GPI            | Glucose-6-phosphate isomerase                                    |
| GPRC5A         | Retinoic acid-induced protein 3                                  |
| GPRC5C         | G-protein coupled receptor family C group 5 member C             |
| GRB2           | Growth factor receptor bound protein 2                           |
| GRHPR          | Glyoxylate reductase/hydroxypyruvate reductase                   |
| GRWD1          | Glutamate rich WD repeat containing 1                            |
| GSN            | Gelsolin                                                         |
| GSS            | Glutathione synthetase                                           |
| GSTP1          | Glutathione S-transferase pi 1                                   |
| GSTT3          | Glutathione S transferase T3                                     |
| H2AFX          | H2A histone family, member X                                     |
| H2AFY          | Core histone macro-H2A.1                                         |
| H2AV           | Histone H2A.V H2AFV                                              |



Table S6 continued

| <b>Synonym</b> | <b>Full name</b>                                                   |
|----------------|--------------------------------------------------------------------|
| HACD3          | Very-long-chain (3R)-3-hydroxyacyl-CoA dehydratase 3               |
| HADHB          | hydroxyacyl-CoA dehydrogenase, beta subunit                        |
| HARS           | Histidine--tRNA ligase, cytoplasmic                                |
| HBA1           | Hemoglobin subunit alpha 1                                         |
| HBA2           | Hemoglobin subunit alpha 2                                         |
| HCFC1          | host cell factor C1                                                |
| HDAC1          | Histone deacetylase 1                                              |
| HDHD3          | Haloacid dehalogenase-like hydrolase domain-containing protein 3   |
| HDLBP          | High density lipoprotein bind. protein (Vigilin)                   |
| HEPH           | Hephaestin                                                         |
| HEXB           | Hexosaminidase subunit beta                                        |
| HIDADH         | 3-hydroxyisobutyrate dehydrogenase                                 |
| HIST1H1A       | Histone H1.1                                                       |
| HIST1H2AD      | Histone H2A type 1-D                                               |
| HIST1H2B       | histone H2B                                                        |
| HIST1H2BB      | Histone H2B type 1-B                                               |
| HIST1H2BC      | Histone H2B type 1-C                                               |
| HIST2A1        | Histone H2A type 1                                                 |
| HIST2B1        | Histone H2B type 1                                                 |
| HIST2H2BE      | Histone H2B type 1-E                                               |
| HIST3H3        | Histone H3.1                                                       |
| HISTH2AD       | Histone H2A type 1-D                                               |
| HK2            | Hexokinase-2                                                       |
| HM13           | Minor histocompatibility antigen H13                               |
| HMGCS1         | Hydroxymethylglutaryl-CoA synthase, cytoplasmic                    |
| HNF1A          | HNF1 homeobox A                                                    |
| HNRNP2B1       | Heterogeneous nuclear ribonucleoprotein A0                         |
| HNRNPA0        | Heterogeneous nuclear ribonucleoprotein B1                         |
| HNRNPA3        | Heterogeneous nuclear ribonucleoprotein A3                         |
| HNRNPAB        | Heterogeneous nuclear ribonucleoprotein A/B                        |
| HNRNPC         | Heterogeneous nuclear ribonucleoproteins C1/C2                     |
| HNRNPDL        | Heterogeneous nuclear ribonucleoprotein D-like                     |
| HNRNPH2        | Heterogeneous nuclear ribonucleoprotein H2                         |
| HNRNPH3        | Heterogeneous nuclear ribonucleoprotein H3                         |
| HNRNPL         | Heterogeneous nuclear ribonucleoprotein L                          |
| HNRNPM         | heterogeneous nuclear ribonucleoprotein M                          |
| HNRNPR         | Heterogeneous nuclear ribonucleoprotein R                          |
| HNRNPUL2       | Heterogeneous nuclear ribonucleoprotein U-like protein 2           |
| HNRPD          | RNA binding protein p42 AUF1                                       |
| HNRPK          | Heterogeneous nuclear ribonucleoprotein K                          |
| HP1BP3         | Heterochromatin protein 1-binding protein 3                        |
| HRAS           | HRas proto-oncogene, GTPase                                        |
| HRSP12         | Ribonuclease UK114                                                 |
| HSBP1          | Heat shock factor binding protein 1                                |
| HSD17B10       | Hydroxysteroid 17-beta dehydrogenase 10                            |
| HSD17B11       | Estradiol 17-beta-dehydrogenase 11                                 |
| HSD17B12       | estradiol 17-beta-dehydrogenase 12                                 |
| HSD17B4        | Peroxisomal multifunctional enzyme type 2                          |
| HSP4           | Heat shock 70 kDa protein D                                        |
| HSP71          | Heat shock protein71                                               |
| HSP90AA1       | Heat shock protein HSP 90-alpha                                    |
| HSP90B1        | Endoplasmic                                                        |
| HSPA1A         | DnaK-type molecular chaperone hsp72-ps1                            |
| HSPA1B         | Heat shock protein 70kd 1B                                         |
| HSPA1L         | Heat shock 70 kDa protein 1-like                                   |
| HSPA2          | Heat shock-related 70 kDa protein 2                                |
| HSPA4          | Heat shock 70 kDa protein 4                                        |
| HSPA4L         | Heat shock 70 kDa protein 4L                                       |
| HSPA5          | 78 kDa glucose-regulated protein                                   |
| HSPA9          | Heat shock protein 90, alpha                                       |
| HSPB1          | Heat shock protein beta-1                                          |
| HSPB11         | Intraflagellar transport protein 25 homolog                        |
| HSPD1          | Heat shock protein family D (Hsp60) member 1                       |
| HSPH1          | Heat shock protein 105 kDa                                         |
| HTRA1          | Serine protease HTRA1                                              |
| HTT            | Huntingtin                                                         |
| HUWE1          | HECT, UBA and WWE domain containing 1, E3 ubiquitin protein ligase |
| HYOU1          | Hypoxia up-regulated 1                                             |
| IARS           | Isoleucyl-tRNA synthetase                                          |
| IDE            | Insulin-degrading enzyme                                           |
| IDH1           | Isocitrate dehydrogenase (NADP(+)) 1, cytosolic                    |
| IDH3A          | Isocitrate dehydrogenase subunit alpha                             |
| IGF2R          | Cation-independent mannose-6-phosphate recept.                     |
| IGSF3          | Immunoglobulin superfamily member 3                                |
| IGSF8          | Immunoglobulin superfamily member 8                                |
| IL24           | Interleukin-24                                                     |
| IL33           | interleukin-33                                                     |
| ILF2           | Interleukin enhancer-binding factor 2                              |
| ILF3           | Interleukin enhancer-binding factor 3                              |
| IMMT           | MICOS complex subunit Mic60                                        |
| IMPDH2         | Inosine-5'-monophosphate dehydrogenase 2                           |

Table S6 continued

| <b>Synonym</b> | <b>Full name</b>                                     |
|----------------|------------------------------------------------------|
| IONP1          | Ion protease homolog                                 |
| IPO4           | Importin-4                                           |
| IQGAP1         | IQ motif containing GTPase activating protein 1      |
| IQGAP2         | Ras GTPase-activating-like protein IQGAP2            |
| IST1           | IST1 homolog                                         |
| ITGA2          | Integrin alpha-2                                     |
| ITGA3          | Integrin alpha-3                                     |
| ITGA6          | Integrin alpha-6                                     |
| ITGAV          | Integrin alpha-V                                     |
| ITGB1          | Integrin beta-1                                      |
| ITGB2          | Integrin beta-2                                      |
| ITGB3          | Integrin beta-3                                      |
| ITGB4          | Integrin beta-4                                      |
| ITGB5          | Integrin beta-5                                      |
| ITIH2          | Inter-alpha-trypsin inhibitor heavy chain H2         |
| ITIH3          | Inter-alpha-trypsin inhibitor heavy chain H3         |
| ITPR2          | Inositol 1,4,5-trisphosphate receptor type 2         |
| ITPR3          | Inositol 1,4,5-trisphosphate receptor type 3         |
| JAM1           | Junctional adhesion molecule A F11R                  |
| JH06 2394      | Transitional endoplasmic reticulum ATPase            |
| JH06 3331      | Diphosphomevalonate decarboxylase                    |
| JH06 4067      | Dihydroorotase                                       |
| JH06 4591      | Fructosamine ketosamine-3-kinase                     |
| JH06 5301      | Glycine-tRNA ligase                                  |
| JUP            | Junction plakoglobin                                 |
| KARS           | Lysine--tRNA ligase                                  |
| KB15           | Keratin, type II cytoskeletal cochleal               |
| KDM1A          | Lysine-specific histone demethylase 1A KDM1A         |
| KIF13B         | Kinesin-like protein KIF13B                          |
| KIF15          | Kinesin family member 15                             |
| KIF5B          | Kinesin family member 5B                             |
| KNTC1          | Kinetochore associated 1                             |
| KPNB1          | Importin subunit beta-1                              |
| KRAS           | GTPase KRas                                          |
| KRT1           | Keratin, type II cytoskeletal 1                      |
| KRT10          | Keratin, type I cytoskeletal 10                      |
| KRT14          | Keratin, type I cytoskeletal 14                      |
| KRT15          | Keratin, type I cytoskeletal 15                      |
| KRT16          | keratin, type I cytoskeletal 16                      |
| KRT17          | keratin, type I cytoskeletal 17                      |
| KRT18          | keratin, type I cytoskeletal 18                      |
| KRT19          | Keratin, type I cytoskeletal 19                      |
| KRT20          | Keratin, type I cytoskeletal 20                      |
| KRT33b         | keratin, type I cuticular Ha3-II                     |
| KRT4           | Keratin, type II cytoskeletal 4                      |
| KRT42          | keratin, type I cytoskeletal 42                      |
| KRT5           | Keratin, type II cytoskeletal 5                      |
| KRT6A          | Keratin, type II cytoskeletal 6A                     |
| KRT6B          | Keratin, type II cytoskeletal 6B                     |
| KRT7           | Keratin, type II cytoskeletal 7                      |
| KRT73          | Keratin, type II cytoskeletal 73                     |
| KRT75          | Keratin, type II cytoskeletal 75                     |
| KRT76          | Keratin, type II cytoskeletal 76                     |
| KRT77          | Keratin, type II cytoskeletal 77                     |
| KRT8           | Keratin, type II cytoskeletal 8                      |
| L2HGDH         | L-2-hydroxyglutarate dehydrogenase                   |
| LAD1           | Ladinin 1                                            |
| LAMA5          | Laminin subunit alpha-5                              |
| LAMB1          | Laminin subunit beta-1                               |
| LAMC1          | Laminin subunit gamma-1                              |
| LAMTOR1        | Ragulator complex protein LAMTOR1                    |
| LAP2A          | Lamina-associated polypeptide 2, isoform alpha       |
| LAP2B          | Lamina-associated polypeptide 2, isoforms beta/gamma |
| LBR            | Lamin-B receptor                                     |
| LCN2           | Neutrophil gelatinase-associated lipocalin           |
| LDHA           | L-lactate dehydrogenase                              |
| LDHAL6B        | L-lactate dehydrogenase A-like 6B                    |
| LDHB           | L-lactate dehydrogenase B chain                      |
| LDLR           | Low density lipoprotein receptor                     |
| LGALS1         | Galectin-1                                           |
| LGALS3         | Galectin-3                                           |
| LGALS3BP       | Galectin-3-binding protein                           |
| LIN7C          | Protein lin-7 homolog C                              |
| LIPH           | Lipase member H                                      |
| LMNA           | Lamin A                                              |
| LMO2           | LIM domain 2                                         |
| LNPEP          | Leucyl-cystinyl aminopeptidase                       |
| LOC100359539   | ribonucleotide reductase M2 polypeptide              |
| LOC100363782   | RAB1B, RAS oncogene family like                      |
| LOC100910308   | multifunctional protein ADE2-like                    |
| LOC100910366   | uncharacterized                                      |

Table S6 continued

| <b>Synonym</b> | <b>Full name</b>                                                                                |
|----------------|-------------------------------------------------------------------------------------------------|
| LOC100910554   | histone H2A type 1-like                                                                         |
| LOC100910688   | PURH-like                                                                                       |
| LOC100911244   | large neutral amino acid transporter small subunit 1-like                                       |
| LOC100911966   | 60S ribosomal protein L7a-like                                                                  |
| LOC100912445   | leucyl-cystinyl aminopeptidase-like                                                             |
| LOC102551071   | myosin light polypeptide 6-like                                                                 |
| LOC102551657   | Sialic acid synthase-like                                                                       |
| LOC102551877   | mRNA turnover protein 4 homolog                                                                 |
| LOC102552480   | histone H2B type 2-E                                                                            |
| LOC102554637   | anionic trypsin-2-like                                                                          |
| LOC103694878   | glutathione S-transferase theta-2-like                                                          |
| LOC286987      | Hemiferrin                                                                                      |
| LONP1          | Lon peptidase 1                                                                                 |
| LRBA           | LPS responsive beige-like anchor protein                                                        |
| LRP1           | LDL receptor related protein 1                                                                  |
| LRPPRC         | Leucine rich pentatricopeptide repeat containing                                                |
| LRRC57         | Leucine-rich repeat-containing protein 57                                                       |
| LRRC59         | Leucine-rich repeat-containing protein 59                                                       |
| LSM1           | U6 snRNA-associated Sm-like protein LSm1                                                        |
| LSM4           | U6 snRNA-associated Sm-like protein LSm4                                                        |
| LSR            | Lipolysis-stimulated lipoprotein receptor                                                       |
| LTA4H          | Leukotriene A-4 hydrolase                                                                       |
| LTN1           | listerin E3 ubiquitin protein ligase 1                                                          |
| LUM            | Lumican                                                                                         |
| LY75           | Lymphocyte antigen 75                                                                           |
| LYN            | Tyrosine-protein kinase Lyn                                                                     |
| LYPLA1         | Lysophospholipase 1                                                                             |
| M6PR           | Mannose-6-phosphate receptor, cation dependent                                                  |
| MACF1          | Microtubule-actin crosslinking factor 1                                                         |
| MAN1A1         | Mannosyl-oligosaccharide 1,2-alpha-mannosidase IA                                               |
| MAN2B1         | Lysosomal alpha-mannosidase                                                                     |
| MAP2K1         | Dual specificity mitogen-activated protein kinase kinase 1                                      |
| MAP4           | Microtubule associated protein 4                                                                |
| MAP4K4         | Mitogen-activated protein kinase kinase 4                                                       |
| MAPK1          | Mitogen-activated protein kinase 1                                                              |
| MAT1A          | Methionine adenosyltransferase 1A                                                               |
| MATR3          | Matrin-3                                                                                        |
| MBOAT7         | Lysophospholipid acyltransferase 7                                                              |
| MCM2           | DNA replication licensing factor MCM2                                                           |
| MCM6           | Minichromosome maintenance complex component 6 [                                                |
| MCU            | Mitochondrial calcium uniporter                                                                 |
| MDH2           | Malate dehydrogenase 2                                                                          |
| MDN1           | Midasin AAA ATPase 1                                                                            |
| MELTF          | Melanotransferrin                                                                               |
| MEP1A          | Meprin A subunit alpha                                                                          |
| MET            | Hepatocyte growth factor receptor                                                               |
| MFGE8          | Lactadherin                                                                                     |
| MF12 /MELTF    | Melanotransferrin                                                                               |
| MINK1          | Misshapen-like kinase 1                                                                         |
| MITD1          | MIT domain-containing protein 1                                                                 |
| MLEC           | Malectin                                                                                        |
| MOB1A          | MOB kinase activator 1A                                                                         |
| MRPL17         | 39S ribosomal protein L17, mitochondrial                                                        |
| MRPL19         | 39S ribosomal protein L19, mitochondrial                                                        |
| MRPL22         | 39S ribosomal protein L22, mitochondrial                                                        |
| MRPL28         | 39S ribosomal protein L28, mitochondrial                                                        |
| MRPL43         | 39S ribosomal protein L43, mitochondrial                                                        |
| MRTO4          | MRT4 homolog, ribosome maturation factor                                                        |
| MSN            | Moesin                                                                                          |
| MTAP           | Methylthioadenosine phosphorylase                                                               |
| MTHFD1         | Methylenetetrahydrofolate dehydrogenase, cyclohydrolase and formyltetrahydrofolate synthetase 1 |
| MTHFD1L        | Monofunctional C1-tetrahydrofolate synthase, mitochondrial                                      |
| MTOR           | Mechanistic target of rapamycin kinase                                                          |
| MUC13          | Mucin-13                                                                                        |
| MUC4           | Mucin 4                                                                                         |
| MVB12A         | Multivesicular body subunit 12A                                                                 |
| MVB12B         | Multivesicular body subunit 12B                                                                 |
| MVP            | Major vault protein                                                                             |
| MYC            | Oncogene, bHLH transcription factor                                                             |
| MYH10          | Myosin, heavy polypeptide 10                                                                    |
| MYH11          | Myosin-11                                                                                       |
| MYH13          | Myosin-13                                                                                       |
| MYH14          | Myosin heavy chain 14                                                                           |
| MYH9           | Myosin, heavy polypeptide 9                                                                     |
| MYL2           | Myosin light chain 2                                                                            |
| MYL6L          | Myosin light polypeptide 6                                                                      |
| MYO10          | Myosin-10                                                                                       |
| MYO1B          | Unconventional myosin-Ib                                                                        |
| MYO1C          | Unconventional myosin-Ic                                                                        |
| MYO1E          | Myosin-1E                                                                                       |
| MYOF           | Myoferlin                                                                                       |

Table S6 continued

| <b>Synonym</b> | <b>Full name</b>                                                     |
|----------------|----------------------------------------------------------------------|
| NAGLU          | Alpha-N-acetylglucosaminidase                                        |
| NAMPT          | Nicotinamide phosphoribosyltransferase                               |
| NANS           | Sialic acid synthase                                                 |
| NAP1L4         | Nucleosome assembly protein 1-like 4                                 |
| NAPA           | NSF attachment protein alpha                                         |
| NARS           | Asparagine--tRNA ligase                                              |
| NBAS           | Neuroblastoma amplified sequence                                     |
| NCBP1          | Nuclear cap-binding protein subunit 1                                |
| NCL            | Nucleolin                                                            |
| NCSTN          | Nicastrin                                                            |
| NDUFA5         | NADH:ubiquinone oxidoreductase subunit A5                            |
| NDUFB10        | NADH:ubiquinone oxidoreductase subunit B10                           |
| NDUFS2         | NADH dehydrogenase [ubiquinone] iron-sulfur protein 2, mitochondrial |
| NDUFS5         | NADH dehydrogenase [ubiquinone] iron-sulfur protein 5                |
| NEMF           | Nuclear export mediator factor                                       |
| NEU1           | Sialidase-1                                                          |
| NIPSNAP3A      | Protein NipSnap homolog 3A                                           |
| NMT1           | Glycylpeptide N-tetradecanoyltransferase 1                           |
| NNT            | Nicotinamide nucleotide transhydrogenase                             |
| NONO           | Non-POU domain-containing octamer-binding protein                    |
| NOP2           | NOP2 nucleolar protein                                               |
| NPC1           | NPC intracellular cholesterol transporter 1                          |
| Npepps         | aminopeptidase puromycin sensitive                                   |
| NPM1           | Nucleophosmin                                                        |
| Nqo1           | NAD(P)H quinone dehydrogenase 1                                      |
| NRAS           | NRAS proto-oncogene, GTPase                                          |
| NSF            | N-ethylmaleimide sensitive factor, vesicle fusing ATPase             |
| NT5C3A         | Cytosolic 5'-nucleotidase 3A                                         |
| NTMT1          | N-terminal Xaa-Pro-Lys N-methyltransferase 1                         |
| NUMA1          | Nuclear mitotic apparatus protein 1                                  |
| NUP210         | Nuclear pore membrane glycoprotein 210                               |
| OAF            | out at first homolog                                                 |
| OAT            | Ornithine aminotransferase, mitochondrial                            |
| OGDH           | 2-oxoglutarate dehydrogenase, mitochondrial                          |
| OGT            | O-linked N-acetylglucosamine transferase                             |
| OLFM4          | Olfactomedin-4                                                       |
| OSBP           | Oxysterol-binding protein 1                                          |
| P4HB           | Prolyl 4-hydroxylase subunit beta                                    |
| PA2G4          | Proliferation-associated protein 2G4                                 |
| PABPC4         | Polyadenylate-binding protein 4                                      |
| PAICS          | Multifunctional protein ADE2                                         |
| PAK1           | Serine/threonine-protein kinase PAK 1                                |
| PARK7          | Parkinsonism associated deglycase                                    |
| PARP1          | Poly [ADP-ribose] polymerase 1                                       |
| PARP4          | Poly [ADP-ribose] polymerase 4                                       |
| PBDC1          | Polysaccharide biosynthesis domain containing 1                      |
| PC             | Pyruvate carboxylase, mitochondrial                                  |
| PCBD1          | Pterin-4 alpha-carbinolamine dehydratase 1                           |
| PCBD2          | Pterin-4 alpha-carbinolamine dehydratase 2                           |
| PCBP3          | Poly(rC)-binding protein 3                                           |
| PCNA           | Proliferating cell nuclear antigen                                   |
| PDAP1          | 28 kDa heat- and acid-stable phosphoprotein                          |
| PDCD10         | Programmed cell death 10                                             |
| PDCD4          | Programmed cell death 4                                              |
| PDCD6          | Programmed cell death 6                                              |
| PDCD6IP        | Programmed cell death 6-interacting protein                          |
| PDCL3          | Phosducin like 3                                                     |
| PDIA3          | Protein disulfide isomerase family A member 3                        |
| PDIA4          | Disulfide-isomerase A4                                               |
| PDIA6          | Protein disulfide isomerase family A member 6                        |
| PDLIM1         | PDZ and LIM domain protein 1                                         |
| PDLIM5         | PDZ and LIM domain 5                                                 |
| PDXK           | Pyridoxal kinase                                                     |
| PEA-15         | Astrocytic phosphoprotein                                            |
| PECR           | Peroxisomal trans-2-enoyl-CoA reductase                              |
| PEPD           | Xaa-Pro dipeptidase                                                  |
| PFAS           | Phosphoribosylformylglycinamide synthase                             |
| PFN1           | Profilin-1                                                           |
| PFN2           | Profilin-2                                                           |
| PGAM1          | Phosphoglycerate mutase 1                                            |
| PGK1           | Phosphoglycerate kinase 1                                            |
| PGM1           | Phosphoglucomutase-1                                                 |
| PHB2           | Prohibitin-2                                                         |
| PKM            | Pyruvate kinase PKM                                                  |
| PKP3           | Plakophilin-3                                                        |
| PLAUR          | Urokinase plasminogen activator surface receptor                     |
| PLEC           | Plectin                                                              |
| PLEKHB2        | Pleckstrin homology domain-containing family B member 2              |
| PLOD1          | Procollagen-lysine,2-oxoglutarate 5-dioxygenase 1                    |
| PLPP2          | Phospholipid phosphatase 2                                           |

Table S6 continued

| <b>Synonym</b> | <b>Full name</b>                                                        |
|----------------|-------------------------------------------------------------------------|
| PLSCR1         | Phospholipid scramblase 1                                               |
| PLSCR3         | Phospholipid scramblase 3                                               |
| PLXNB2         | Plexin-B2                                                               |
| PNPT1          | Polyribonucleotide nucleotidyltransferase 1, mitochondrial              |
| POF1B          | Protein POF1B                                                           |
| POLA1          | DNA polymerase alpha catalytic subunit                                  |
| POLR1C         | RNA polymerase I and III subunit C                                      |
| POLR2B         | DNA-directed RNA polymerase II subunit RPB2                             |
| POTEF          | POTE ankyrin domain family member F                                     |
| PPA1           | pyrophosphatase 1                                                       |
| PPIA           | Peptidyl-prolyl cis-trans isomerase A                                   |
| PPIB           | Peptidyl-prolyl cis-trans isomerase B                                   |
| PPID           | peptidylprolyl isomerase D                                              |
| PPIDL1         | peptidylprolyl isomerase D-like 1                                       |
| PPL            | Periplakin                                                              |
| PPL/ D4A5T8    | Periplakin                                                              |
| PPM1D          | Protein phosphatase, Mg2+/Mn2+ dependent 1D                             |
| PPM1G          | Protein phosphatase 1G                                                  |
| PPP1CB         | Serine/threonine-protein phosphatase PP1-beta catalytic subunit         |
| PPP1CC         | Serine/threonine-protein phosphatase                                    |
| PPP1R7         | Protein phosphatase 1 regulatory subunit 7                              |
| PPP2CA         | Serine/threonine-protein phosphatase 2A catalytic subunit alpha isoform |
| PPP2R1B        | Serine/threonine-protein phosphatase subunit A beta                     |
| Ppp3ca         | protein phosphatase 3 catalytic subunit alpha                           |
| PRDX2          | Peroxiredoxin-2                                                         |
| PRDX3          | Peroxiredoxin-3                                                         |
| PRKAR2A        | Protein kinase cAMP-dependent type II regulatory subunit alpha          |
| PRKCSH         | Glucosidase 2 subunit beta                                              |
| PRKCZ          | Protein kinase C zeta                                                   |
| PRMT1          | Protein arginine N-methyltransferase 1                                  |
| PROM1          | Prominin-1                                                              |
| PRPF19         | Pre-mRNA-processing factor 19                                           |
| PRPS1          | Ribose-phosphate pyrophosphokinase 1                                    |
| PRPSAP1        | Phosphoribosyl pyrophosphate synthetase associated protein 1            |
| PRPSAP2        | Pyrophosphate synthase-assoc. protein2                                  |
| PRSS23         | Serine protease 23                                                      |
| PSAT1          | Phosphoserine aminotransferase                                          |
| PSMA1          | Proteasome subunit alpha type-1                                         |
| PSMA2          | Proteasome subunit alpha type-2                                         |
| PSMA3          | Proteasome subunit alpha type-3                                         |
| PSMA4          | Proteasome subunit alpha type                                           |
| PSMA6          | Proteasome subunit alpha type-6                                         |
| PSMA7          | Proteasome subunit alpha type-7                                         |
| PSMB10         | Proteasome subunit beta type 10                                         |
| PSMB3          | Proteasome subunit beta type 3                                          |
| PSMB5          | Proteasome subunit beta type 5                                          |
| PSMB6          | Proteasome subunit beta type-6                                          |
| PSMB7          | Proteasome subunit beta type-7                                          |
| PSMB8          | Proteasome subunit beta type-8                                          |
| PSMB9          | Proteasome subunit beta type                                            |
| PSMC2          | 26S protease regulatory subunit 7                                       |
| PSMD1          | 26S proteasome non-ATPase regulatory subunit 1                          |
| PSMD11         | 26S proteasome non-ATPase regulatory subunit 11                         |
| PSMD12         | 26S proteasome non-ATPase regulatory subunit 12                         |
| PSMD13         | 26S proteasome non-ATPase regulatory subunit 13                         |
| PSMD3          | 26S proteasome non-ATPase regulatory subunit 3                          |
| PSMD5          | 26S proteasome non-ATPase regulatory subunit 5                          |
| PSMD6          | 26S proteasome non-ATPase regulatory subunit 6                          |
| PSMD7          | 26S proteasome non-ATPase regulatory subunit 7                          |
| PSME1          | Proteasome activator complex subunit 1                                  |
| PSME2          | Proteasome activator complex subunit 2                                  |
| PTBP3          | Polypyrimidine tract-binding protein 3                                  |
| PTCD3          | Pentatricopeptide repeat domain-containing protein 3, mitochondrial     |
| PTDSS1         | Phosphatidylserine synthase 1                                           |
| PTGFB          | Platelet derived growth factor subunit B                                |
| PTGFRN         | Prostaglandin F2 receptor negative regulator                            |
| PTGR1          | Prostaglandin reductase 1                                               |
| PTGS2          | Prostaglandin-endoperoxide synthase 2                                   |
| PTP4A1         | Protein tyrosine phosphatase type IVA 1                                 |
| PTP4A2         | Protein tyrosine phosphatase type IVA 2                                 |
| PTPRA          | Receptor-type tyrosine-protein phosphatase alpha                        |
| PTPRF          | Receptor-type tyrosine-protein phosphatase F                            |
| PTRF           | Polymerase I and transcript release factor                              |
| PUS7           | Pseudouridylate synthase 7 homolog                                      |
| PVR            | Tumor-associated glycoprotein E4, poliovirus receptor                   |
| PYCR1          | Pyrroline-5-carboxylate reductase 1, mitochondrial                      |
| PYCR2          | Pyrroline-5-carboxylate reductase 2                                     |
| PYCR3          | Pyrroline-5-carboxylate reductase 3                                     |
| PYGL           | Glycogen phosphorylase, brain form                                      |
| PYGL           | Glycogen phosphorylase, liver form                                      |

Table S6 continued

| <b>Synonym</b> | <b>Full name</b>                                           |
|----------------|------------------------------------------------------------|
| Q4AEF8 /COPG1  | Coatomer protein complex subunit gamma 1                   |
| QDPR           | Dihydropteridine reductase                                 |
| QPCT           | Glutaminy-peptide cyclotransferase                         |
| QSOX1          | Sulfhydryl oxidase 1                                       |
| RAB10          | Ras-related protein Rab-10                                 |
| RAB11B         | Ras-related Rab-11B                                        |
| RAB14          | Rab14, member RAS oncogene family                          |
| RAB18          | Ras-related protein Rab-18                                 |
| RAB22A         | Ras-related protein Rab-22A                                |
| Rab23          | Ras-related protein Rab-23                                 |
| RAB25          | Ras-related protein Rab-25                                 |
| RAB31          | Ras-related protein Rab-31                                 |
| RAB35          | Ras-related protein Rab-35                                 |
| RAB5A          | Ras-related protein Rab-5A                                 |
| RAB5B          | Ras-related protein Rab-5B                                 |
| RAB5C          | Rab5c, member RAS oncogene family                          |
| RAB6A          | Ras-related protein Rab-6A                                 |
| RAB6B          | Ras-related protein Rab-6B                                 |
| RAB6C          | Ras-related protein Rab-6C                                 |
| RAB7A          | Ras-related protein Rab-7A                                 |
| RAB8A          | Ras-related protein Rab-8A                                 |
| RAC1           | Rac family small GTPase 1                                  |
| RACK1 / GNB2L1 | receptor for activated C kinase 1                          |
| RACK1          | Receptor of activated protein C kinase 1                   |
| RAD23B         | UV excision repair protein RAD23 homolog B                 |
| RALA           | Ras-related protein Ral-A                                  |
| RALB           | Ras-related protein Ral-B                                  |
| RALY           | RNA-binding protein Raly                                   |
| RANGAP1        | Ran GTPase-activating protein 1                            |
| RAP1A          | Ras-related protein Rap-1A                                 |
| RAP1B          | Ras-related protein Rap-1b                                 |
| RAP2A          | Ras-related protein Rap-2a                                 |
| RAP2B          | Ras-related protein Rap-2b                                 |
| RAP2C          | Ras-related protein Rap-2c                                 |
| RAS            | Ras protein                                                |
| RBBP9          | Putative hydrolase RBBP9                                   |
| RBM8A          | RNA binding motif protein 8A                               |
| RBMX           | RNA-binding motif protein, X chromosome                    |
| Rcc2           | regulator of chromosome condensation 2                     |
| RDX            | Radixin                                                    |
| REEP6          | Receptor expression-enhancing protein 6                    |
| RFK            | Riboflavin kinase                                          |
| RGD1561636     | Similar to 60S ribosomal protein L38                       |
| RGD1564698     | Similar to ribosomal protein S10                           |
| RHEB           | GTP-binding protein Rheb                                   |
| RHOB           | Rho-related GTP-binding protein RhoB                       |
| RHOF           | Rho-related GTP-binding protein RhoF                       |
| RHOG           | Rho-related GTP-binding protein RhoG                       |
| RIF1           | Telomere-associated protein RIF1                           |
| RL7            | 60S ribosomal protein L7 RPL7                              |
| RNF213         | Ring finger protein 213                                    |
| RNPEP          | Aminopeptidase B                                           |
| ROCK2          | Rho associated coiled-coil containing protein kinase 2     |
| ROR1           | Inact. tyrosine-protein kinase transmembrane receptor ROR1 |
| RPA1           | Ribose-5-phosphate isomerase                               |
| RPA3           | replication protein A3                                     |
| RPL10          | 60S ribosomal protein L10                                  |
| RPL10A         | 60S ribosomal protein L10A                                 |
| RPL12          | 60S ribosomal protein L12                                  |
| RPL13          | 60S ribosomal protein L13                                  |
| RPL13A         | 60S ribosomal protein L13A                                 |
| RPL14          | 60S ribosomal protein L14                                  |
| RPL15          | 60S ribosomal protein L15                                  |
| RPL15a         | 60S ribosomal protein L15A                                 |
| RPL17          | 60S ribosomal protein L17                                  |
| RPL18          | 60S ribosomal protein L18                                  |
| RPL18A         | 60S ribosomal protein L18a                                 |
| RPL2           | 60S ribosomal protein L2                                   |
| RPL23A         | 60S ribosomal protein L23a                                 |
| RPL26          | 60S ribosomal protein L26                                  |
| RPL28          | 60S ribosomal protein L28                                  |
| RPL3           | 60S ribosomal protein L3                                   |
| RPL30          | 60S ribosomal protein L30                                  |
| RPL34          | 60S ribosomal protein L34                                  |
| RPL35A         | 60S ribosomal protein L35a                                 |
| RPL36          | 60S ribosomal protein L36                                  |
| RPL36A         | 60S ribosomal protein L36a                                 |
| RPL36L         | 60S ribosomal protein L36a-like                            |
| RPL37A         | 60S ribosomal protein L37a                                 |
| RPL4           | 60S ribosomal protein L4                                   |

Table S6 continued

| <b>Synonym</b> | <b>Full name</b>                                                       |
|----------------|------------------------------------------------------------------------|
| Rpl5           | 60S ribosomal protein L5                                               |
| RPL6           | 60S ribosomal protein L6                                               |
| RPL7           | 60S ribosomal protein L7                                               |
| RPL7A          | 60S ribosomal protein L7a                                              |
| RPL9           | 60S ribosomal protein L9                                               |
| RPLP0          | 60S acidic ribosomal protein P0                                        |
| RPLP2          | 60S acidic ribosomal protein P2                                        |
| RPN1           | Ribophorin I                                                           |
| RPN2           | Ribophorin II                                                          |
| RPS11          | 40S ribosomal protein S11                                              |
| RPS12          | 40S ribosomal protein S12                                              |
| RPS15a         | 40S ribosomal protein S15a                                             |
| RPS17          | 40S ribosomal protein S17                                              |
| RPS2           | 40S ribosomal protein S2                                               |
| RPS27A         | Ubiquitin-40S ribosomal protein S27a                                   |
| RPS3           | 40S ribosomal protein S3                                               |
| RPS3A          | 40S ribosomal protein S3a                                              |
| RPS4X          | 40S ribosomal protein S4, X isoform                                    |
| RPS6KA1        | Ribosomal protein S6 kinase A1                                         |
| RPS6KA3        | Ribosomal protein S6 kinase A3                                         |
| RPS7           | 40S ribosomal protein S7                                               |
| RPSA           | 40S ribosomal protein SA                                               |
| RRAS           | Ras-related protein R-Ras                                              |
| RRBP1          | Ribosome-binding protein 1                                             |
| RSU1           | Ras suppressor protein 1                                               |
| RT1.A1(0)      | RT1 class Ia, locus A1                                                 |
| RTN4           | Reticulon 4                                                            |
| S100-A14       | S100 calcium binding protein A14                                       |
| S100A4         | S100 calcium binding protein A4                                        |
| SAFB           | Scaffold attachment factor B1                                          |
| SARNP          | SAP domain-containing ribonucleoprotein                                |
| SARS           | Serine--tRNA ligase, cytoplasmic                                       |
| SART3          | spliceosome associated factor 3, U4/U6 recycling protein               |
| SBNO1          | strawberry notch homolog 1                                             |
| SCARB2         | Lysosome membrane protein 2                                            |
| SDCBP          | Syntenin-1                                                             |
| SDCBP2         | Syntenin-2                                                             |
| SDF4           | 45 kDa calcium-binding protein                                         |
| SEC13          | Protein SEC13 homolog                                                  |
| SEC23A         | Sec23 homolog A, coat complex II component                             |
| SEC23B         | Sec23 homolog B, coat complex II component                             |
| SEC24A         | SEC24 homolog A, COPII coat complex comp.                              |
| SEC31A         | SEC31 homolog A, COPII coat complex component                          |
| SEC63          | Translocation protein SEC63 homolog                                    |
| SELENOF        | Selenoprotein F                                                        |
| SELENOH        | Selenoprotein H                                                        |
| SEPT2          | Septin-2                                                               |
| SEPT7          | Septin-7                                                               |
| SEPT9          | Septin-9                                                               |
| SERINC5        | Serine incorporator 5 SERINC5                                          |
| SERPINB6       | Serpin B6                                                              |
| SERPINB9       | Serpin B9                                                              |
| SERPINC1       | Serpin family C member 1                                               |
| SERPINE2       | Glia-derived nexin SERPINE2                                            |
| SERPINF1       | Serpin family F member 1                                               |
| SET            | SET nuclear protooncogene                                              |
| SF3A1          | Splicing factor 3a subunit 1                                           |
| SF3B1          | Splicing factor 3b subunit 1                                           |
| Sf3b3          | Splicing factor 3b subunit 3                                           |
| SFN            | stratifin                                                              |
| SFPQ           | Splicing factor, proline- and glutamine-rich                           |
| SHMT1          | Serine hydroxymethyltransferase 1                                      |
| SLC12A1        | Solute carrier family 12 member 1                                      |
| SLC16A3        | Monocarboxylate transporter 4                                          |
| SLC1A5         | Neutral amino acid transporter B(0)                                    |
| SLC25A3        | Solute carrier family 25 member 3                                      |
| SLC25A4        | Solute carrier family 25 member 4                                      |
| SLC25A5        | Solute carrier family 25 member 5                                      |
| SLC29A1        | Equilibrative nucleoside transporter 1                                 |
| SLC2A1         | Solute carrier family 2, facilitated glucose transporter member 1      |
| SLC35A4        | SLC35A4 upstream open reading frame protein                            |
| SLC3A2         | 4F2 cell-surface antigen heavy chain                                   |
| SLC43A1        | Large neutral amino acids transporter small subunit 3                  |
| SLC44A1        | Choline transporter-like protein 1                                     |
| SLC44A2        | Choline transporter-like protein 2                                     |
| SLC7A1         | High affinity cationic amino acid transporter 1                        |
| SMARCA4        | Transcription activator BRG1                                           |
| SMARCA5        | SWI/SNF-related matrix-associated actin-dep. regulator of chromatin A5 |
| SMARCC1        | Matrix assoc., actin dep. regulator chromatin c1                       |
| SMC1A          | Structural maintenance of chromosomes protein 1A                       |

Table S6 continued

| <b>Synonym</b> | <b>Full name</b>                                                         |
|----------------|--------------------------------------------------------------------------|
| SMC3           | Structural maintenance of chromosomes protein 3                          |
| SMCHD1         | Structural maintenance of chromosomes flexible hinge domain containing 1 |
| SMPDL3B        | Acid sphingomyelinase-like phosphodiesterase 3b                          |
| SND1           | Staphylococcal nuclease and tudor domain containing 1                    |
| SNRPF          | Small nuclear ribonucleoprotein polypeptide F                            |
| SNX2           | Sorting nexin-2                                                          |
| SPRYD4         | SPRY domain-containing protein 4                                         |
| SPTAN1         | Spectrin alpha chain 1                                                   |
| SPTBN1         | Spectrin beta chain, non-erythrocytic 1                                  |
| SPTBN2         | Spectrin beta chain, non-erythrocytic 2                                  |
| SRC            | Proto-oncogene tyrosine-protein kinase Src                               |
| SRI            | Sorcin                                                                   |
| SRPRB          | SRP receptor subunit beta                                                |
| SRRT           | Serrate RNA effector molecule homolog                                    |
| SRSF1          | Serine/arginine-rich splicing factor 1                                   |
| SRSF3          | Serine/arginine-rich splicing factor 3                                   |
| SSB            | Lupus La protein homolog                                                 |
| SSBP1          | Single-stranded DNA-binding protein, mitochondrial precursor             |
| SSR4           | Translocon-associated protein subunit delta                              |
| ST14           | Suppressor of tumorigenicity 14 protein                                  |
| STIP1          | Stress induced phosphoprotein 1                                          |
| STK26          | Serine/threonine-protein kinase 26                                       |
| STMN1          | Stathmin                                                                 |
| STOM           | Erythrocyte band 7 integral membrane protein                             |
| STT3A          | Oligosaccharyltransferase complex, catalytic subunit                     |
| STT3B          | Oligosaccharyltransferase complex, catalytic subunit                     |
| STX12          | Syntaxin-12                                                              |
| STX3           | Syntaxin-3                                                               |
| STX4           | Syntaxin-4                                                               |
| STX7           | Syntaxin-7                                                               |
| STXBP2         | Syntaxin-binding protein 2                                               |
| SUPT16H        | SPT16 homolog, facilitates chromatin remodeling subunit                  |
| SYNCRIP        | Synaptotagmin binding cytoplasmic RNA interacting protein                |
| SYNGR2         | Synaptogyrin-2                                                           |
| SYVC           | Valine--tRNA ligase                                                      |
| TACSTD2        | Tumor associated calcium signal transducer 2                             |
| TAGLN2         | Transgelin-2                                                             |
| TALDO1         | Transaldolase 1                                                          |
| TAOK1          | TAO kinase 1                                                             |
| TARS           | Valine--tRNA ligase                                                      |
| TBCA           | Tubulin folding cofactor A                                               |
| TCERG1         | Transcription elongation regulator 1                                     |
| TCP1           | T-complex protein 1 subunit alpha                                        |
| TECR           | Very-long-chain enoyl-CoA reductase                                      |
| Testin         | Testin gene                                                              |
| TFG            | Trk-fused gene                                                           |
| TFRC           | Transferrin receptor                                                     |
| TGFBI          | Transforming growth factor-beta-induced protein ig-h3                    |
| TGFBR1         | Transforming growth factor beta receptor 1                               |
| THBS1          | Thrombospondin-1                                                         |
| THOP1          | Thimet oligopeptidase 1                                                  |
| TINAGL1        | Tubulointerstitial nephritis antigen like 1                              |
| TKFC           | Triokinase/FMN cyclase                                                   |
| TKT            | Transketolase                                                            |
| TLN1           | Talin-1                                                                  |
| TLN2           | Talin-2                                                                  |
| TLR4           | toll-like receptor 4                                                     |
| TM9SF2         | Transmembrane 9 superfamily member 2                                     |
| TM9SF4         | Transmembrane 9 superfamily member 4                                     |
| TMED10         | Transmembrane p24 trafficking protein 10                                 |
| TMED3          | Transmembrane emp24 domain-containing protein 3                          |
| TMEM106B       | Transmembrane protein 106B                                               |
| TMEM2          | Transmembrane protein 2                                                  |
| TMPRSS4        | Transmembrane protease serine 4                                          |
| TNIK           | TRAF2 and NCK-interacting protein kinase                                 |
| TOM1L1         | TOM1-like protein 1                                                      |
| TOM22          | Translocase of outer mitochondrial membrane 22                           |
| TOMM40         | Translocase of outer mitochondrial membrane 40                           |
| TOP2A          | DNA topoisomerase II alpha                                               |
| TP53           | Tumor protein p53                                                        |
| TP53BP1        | Tumor protein p53 binding protein 1                                      |
| TP11           | Triosephosphate isomerase 1                                              |
| TPM1           | Tropomyosin 1                                                            |
| TPM3           | Tropomyosin 3                                                            |
| TPM4           | Tropomyosin alpha-4 chain                                                |
| TPR            | Translocated promoter region, nuclear basket protein                     |
| TPR0           | Nucleoprotein TPR                                                        |
| TRA2B          | Transformer-2 protein homolog beta                                       |
| TRAP1          | TNF receptor associated protein 1                                        |
| TRIM21         | E3 ubiquitin-protein ligase TRIM21                                       |



Table S6 continued

| <b>Synonym</b> | <b>Full name</b>                                       |
|----------------|--------------------------------------------------------|
| TRIM28         | Tripartite motif containing 28                         |
| TRIP11         | Thyroid receptor-interacting protein 11                |
| TRIP12         | Thyroid hormone receptor interactor 12                 |
| TROVE2         | 60 kDa SS-A/Ro ribonucleoprotein                       |
| TRP / TYRP1    | Tyrosinase related protein 1                           |
| TRRAP          | Transformation/transcription domain-associated protein |
| TSG101         | Tumor susceptibility gene 101 protein                  |
| TSN            | Translin                                               |
| TSNAX          | Translin-associated protein X                          |
| TSPAN1         | Tetraspanin-1                                          |
| TSPAN14        | Tetraspanin-14                                         |
| TSPAN15        | Tetraspanin-15                                         |
| TSPAN3         | Tetraspanin-3                                          |
| TSPAN4         | Tetraspanin-4                                          |
| TSPAN6         | Tetraspanin-6                                          |
| TSPAN8         | Tetraspanin-8                                          |
| TSTA3          | GDP-L-fucose synthase                                  |
| TTYH3          | Protein tweety homolog 3                               |
| TUBA1A         | Tubulin alpha-1A chain                                 |
| TUBA1B         | Tubulin alpha                                          |
| TUBA1C         | Tubulin alpha-1C chain                                 |
| TUBA4A         | Tubulin alpha-4A chain                                 |
| TUBA8          | Tubulin alpha-8 chain                                  |
| TUBB1          | Tubulin beta-1 chain                                   |
| TUBB2A         | Tubulin beta-2A chain                                  |
| TUBB3          | Tubulin beta-3 chain                                   |
| TUBB4B         | Tubulin alpha-4B chain                                 |
| TUBB5          | Tubulin beta-5 chain                                   |
| TUBB6          | Tubulin beta-6 chain                                   |
| TUFM           | Tu translation elongation factor, mitochondrial        |
| TXN            | Thioredoxin                                            |
| TXNDC12        | Thioredoxin domain containing 12                       |
| TXNL1          | Thioredoxin-like protein 1                             |
| UBA1           | Ubiquitin like modifier activating enzyme 1            |
| UBA6           | Ubiquitin like modifier activating enzyme 6            |
| UBB            | Polyubiquitin-B                                        |
| UBC            | Ubiquitin C                                            |
| UBE2I          | Ubiquitin conjugating enzyme E2 I                      |
| UBE2L3         | Ubiquitin-conjugating enzyme E2 L3                     |
| UBE2O          | (E3-independent) E2 ubiquitin-conjugating enzyme       |
| UBE2V1         | Ubiquitin-conjugating enzyme E2 variant 1              |
| UBE2V2         | Ubiquitin-conjugating enzyme E2 variant 2              |
| UBR4           | Ubiquitin protein ligase E3 component n-recognin 4     |
| UBR5           | E3 ubiquitin-protein ligase UBR5                       |
| UEVLD          | Ubiquitin-conjugating enzyme E2 variant 3              |
| UGDH           | UDP-glucose 6-dehydrogenase                            |
| UGGT1          | UDP-glucose glycoprotein glucosyltransferase 1         |
| UGT1A6         | UDP-glucuronosyltransferase 1-6                        |
| UGT1A7         | UDP-glucuronosyltransferase 1-7                        |
| USO1           | General vesicular transport factor p115                |
| USP15          | Ubiquitin carboxyl-terminal hydrolase                  |
| USP47          | Ubiquitin carboxyl-terminal hydrolase 47               |
| USP7           | Ubiquitin specific peptidase 7                         |
| USP9X          | Ubiquitin specific peptidase 9 X-linked                |
| UXS1           | UDP-glucuronic acid decarboxylase 1                    |
| VAMP3          | Vesicle associated membrane protein 3                  |
| VAT1           | Synaptic vesicle membrane protein VAT-1 homolog        |
| VCP            | Transitional endoplasmic reticulum ATPase              |
| VDAC1          | Voltage-dependent anion-selective channel protein 1    |
| VPS25          | Vacuolar protein-sorting-associated protein 25         |
| VPS28          | Vacuolar protein sorting-associated protein 28 homolog |
| VPS36          | Vacuolar protein-sorting-associated protein 36         |
| VPS37B         | Vacuolar protein sorting-associated protein 37B        |
| VPS37C         | Vacuolar protein sorting-associated protein 37C        |
| VPS4B          | Vacuolar protein sorting-associated protein 4B         |
| WARS           | Tryptophan--tRNA ligase, cytoplasmic                   |
| WDR61          | WD repeat domain 61                                    |
| WFS1           | Wolframin                                              |
| XPO1           | Exportin-1                                             |
| XPO2           | Exportin-2                                             |
| XRCC5          | X-ray repair cross-complementing protein 5             |
| XRCC6          | X-ray repair complementing defective repair            |
| YBX1           | Nuclease-sensitive element-binding protein 1           |
| YES1           | Tyrosine-protein kinase Yes                            |
| YWHAE          | 14-3-3 protein epsilon                                 |
| YWHAG          | 14-3-3 protein gamma                                   |
| YWHAZ          | 14-3-3 protein zeta                                    |
| ZDHHC5         | Palmitoyltransferase ZDHHC5                            |

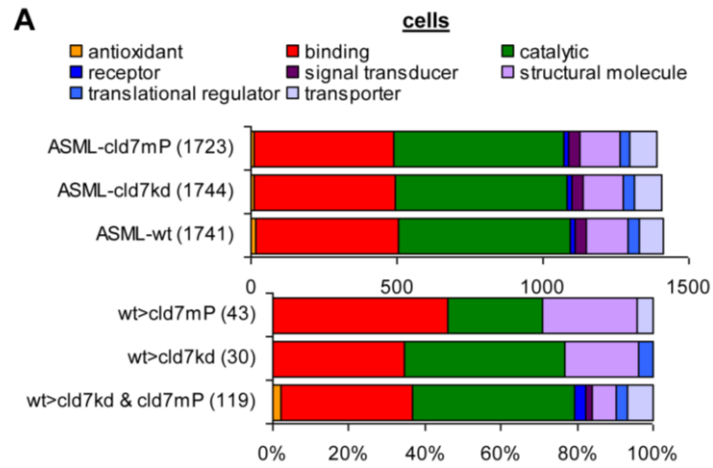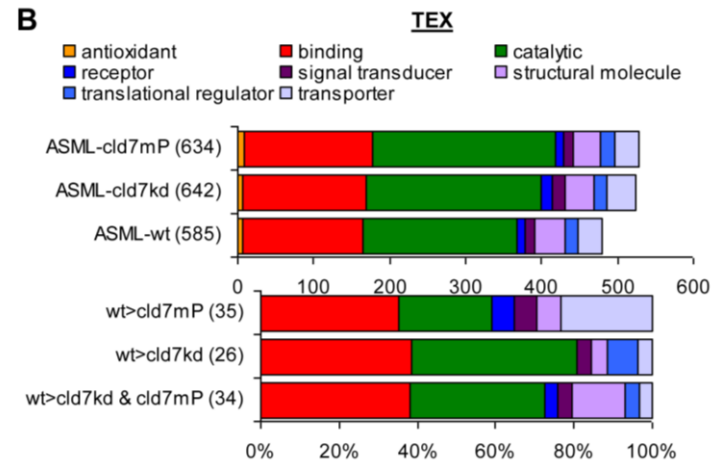

**C**    transcription / translation    structure    adhesion / migration    metabolisms    signaling    proteolysis / apoptosis    trafficking / transport

**Functional activity of proteins enriched in ASML-wt compared to -cld7kd and -cld7mP cells**

|              |       |        |            |              |         |              |            |        |
|--------------|-------|--------|------------|--------------|---------|--------------|------------|--------|
| A0A0G2K273   | Krt20 | Clip2  | A0A0G2K099 | Immt         | Ap2a1   | Acs14        | A0A0G2K099 | Lrp1   |
| Csd1         | Tubb3 | D4A5T8 | Acs14      | LOC103694878 | Erp29   | Aifm1        | Ap2a1      | Macf1  |
| Dazap1       |       | Fat1   | Ahcy12     | Lrp1         | Fancd2  | Ctsz         | Ap2a1      | Macf1  |
| Dnajc2       |       | HUWE1  | Akr7a2     | Mia3         | Itag6   | Fancd2       | Atp1b1     | Napa   |
| Fancd2       |       |        | Ap2a1      | Mlec         | Itgb1   | Krt20        | Atp1b2     | Poir2b |
| Hcfc1        |       |        | Cbr4       | Ogt          | Lgals1  | Lgals1       | Ccs        | Psmb5  |
| Hdac1        |       |        | Ccs        | Pdia6        | Lrba    | LOC102554637 | Cope       | Q4aef8 |
| Kntc1        |       |        | Ctsz       | Pecr         | Macf1   | Pdia6        | Ctsz       | Rab31  |
| LOC100359539 |       |        | Eno2       | Ppp1cc       | Mob1a   | Prdx3        | Esyt1      | Rab6a  |
| LOC100912445 |       |        | Far1       | Prdx3        | Polr2b  | Rps6ka3      | Golga4     | Sec23b |
| Mcm6         |       |        | Golgb1     | Smc1a        | Pp1cc   | Trip12       | Golgb1     | Trip11 |
| Pola1        |       |        | HK2        | Usp15        | Psmb5   |              |            |        |
| Rpl17        |       |        | HUWE1      | Usp9x        | Rab31   |              |            |        |
| Sarmp        |       |        |            |              | Rps6ka3 |              |            |        |
| Sart3        |       |        |            |              | Sfn     |              |            |        |
| Snrpf        |       |        |            |              | Smchd1  |              |            |        |
| Trip12       |       |        |            |              | Stmn1   |              |            |        |
| Tufm         |       |        |            |              | Usp9x   |              |            |        |

**Functional activity of proteins enriched in ASML-wt compared to -cld7kd cells**

|            |       |       |         |       |          |        |
|------------|-------|-------|---------|-------|----------|--------|
| Bud31      | Anln1 | Drg2  | Ldlr    | Gdi1  | Serpinb6 | Dctn1  |
| Eef1a1     | Flii  | Itga3 | Prpsap2 | Grb2  | Serpinb9 | GDi1   |
| Iars       | Itgb4 | Itgb4 | Uba6    | Itga3 | Usp7     | Ldlr   |
| Pcbd1      |       |       |         | Itgb4 |          | Rab35  |
| RGD1564698 |       |       |         | Rap1a |          | Sec23a |
| Rpl7       |       |       |         |       |          |        |
| Sf3b1      |       |       |         |       |          |        |
| Usp7       |       |       |         |       |          |        |

**Functional activity of proteins enriched in ASML-wt compared to -cld7mP cells**

|        |       |              |          |        |        |        |
|--------|-------|--------------|----------|--------|--------|--------|
| Bzw1   | Krt14 | Bzw2         | Eif2s3   | Cdk1   | D3ZD23 | Ap2a2  |
| Cdk1   | Krt17 | Cott1        | Eif4a2   | Hras   | Dnm1l  | Ap2s1  |
| Ddx5   | Krt6a | LOC100911966 | Hdlbp    | Krt17  | Lmna   | Arcn1  |
| Eif2s3 | Lmna  |              | Hsd17b10 | Ncl    | Ncl    | Arf3   |
| Ncl    | Tpm4  |              | L2hgdh   | Psmc2  | Ppid1l | D3ZD23 |
| Psmc2  | Tubb1 |              | Ugdh     | Rpl13a |        | Dnm1l  |
| Rpl10  |       |              |          |        |        | Eif2s3 |
| Rpl13a |       |              |          |        |        | Gcc2   |
| Rpl15a |       |              |          |        |        | Hdlbp  |
| Rps2   |       |              |          |        |        | Kif15  |
| Ssb    |       |              |          |        |        | Mcu    |
|        |       |              |          |        |        | Nbas   |
|        |       |              |          |        |        | Sec24a |
|        |       |              |          |        |        | Tubb1  |

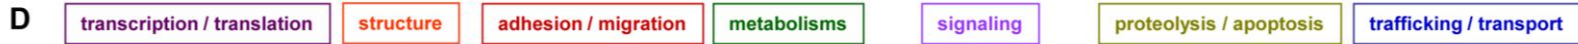

**Functional activity of proteins enriched in ASML-wt TEX compared to -cld7kd TEX and -cld7mP TEX**

|          |       |       |       |       |       |       |
|----------|-------|-------|-------|-------|-------|-------|
| Dcps     | Kb15  | CD166 | Ctps1 | CD166 | Psm12 | Clic1 |
| Eif2s1   | Krt6  | Itga2 | Ide   | Itg2a |       | Myo10 |
| Eif2s3x  | Tuba8 | Muc4  |       | Kb15  |       | Ras   |
| Hist1h2b |       |       |       | Myo10 |       | Rdx   |
| Hist2A1  |       |       |       | Ras   |       |       |
| Hist2B1  |       |       |       | Rdx   |       |       |
| Rpa1     |       |       |       |       |       |       |

**Functional activity of proteins enriched in ASML-wt TEX compared to -cld7kd TEX**

|       |      |        |
|-------|------|--------|
| Rpl7  | Mdh2 | Hspa1a |
| Tsnax |      |        |

**Functional activity of proteins enriched in ASML-wt TEX compared to -cld7mP TEX**

|       |         |          |       |        |       |       |
|-------|---------|----------|-------|--------|-------|-------|
| Eif3t | Actn1   | Lgals3bp | Ggt1  | Hsp71  | Lta4h | Hsp71 |
| Ggt1  | Krt14   | PVR      | Psat1 | Rtn4   |       | Rtn4  |
| H2afx | Krt16   |          |       | Tuba1b |       |       |
|       | Krt17   |          |       |        |       |       |
|       | Krt42   |          |       |        |       |       |
|       | Krt5    |          |       |        |       |       |
|       | S100a14 |          |       |        |       |       |
|       | Tuba1b  |          |       |        |       |       |

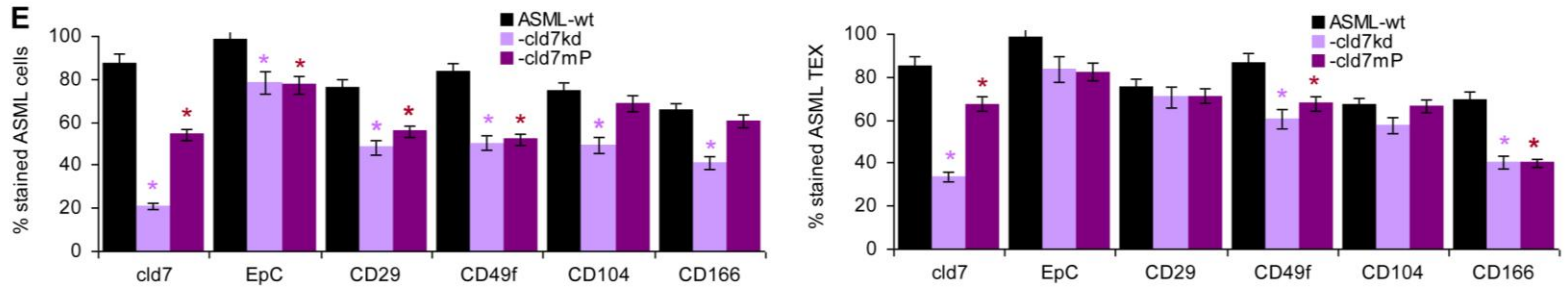

**F**

**Functional activity of proteins enriched in ASML-wt TEX compared to -cld7kd cells**

| transcription / translation | structure | adhesion / migration | metabolisms | signaling | proteolysis / apoptosis | trafficking / transport |
|-----------------------------|-----------|----------------------|-------------|-----------|-------------------------|-------------------------|
| Anxa3                       | Kb15      | Adam10               | Apob        | Adam10    | Adam10                  | Anxa6                   |
| Cops3                       | Krt16     | C3                   | Asl         | Anxa6     | Anxa6                   | Apob                    |
| Cpsf7                       | Krt17     | CD166                | Asns        | Apob      | Clu                     | CD59                    |
| Dcps                        | Krt42     | CD9                  | Atp6ap2     | Atp6ap2   | Eef1e1                  | CD63                    |
| Eef1a1                      | Krt6      | Coro1c               | Carkd       | C3        | F2                      | Chmp3                   |
| Eef1e1                      | Krt76     | Epcam                | CD59        | CD59      | Myo10                   | Clic1                   |
| Eif2s3                      | Ras       | Hexb                 | Cds1        | CD63      | Park7                   | Clic1b                  |
| Eif3l                       |           | Hist1h2b             | Comt        | CD9       | Plekhh2                 | Cops3                   |
| Eif3m                       |           | Itga3                | Eef1e1      | Clu       | Plxnb2                  | Cops4                   |
| Eif3t                       |           | Itga6                | Eif2s3      | Coro1c    | Ppp2ca                  | Cops5                   |
| Eno1                        |           | Itgb3                | Eif3l       | Eef1e1    | Prom1                   | Cops6                   |
| Epcam                       |           | Itgb4                | Eif3m       | Epcam     | Psmb5                   | Dera                    |
| Grwd1                       |           | JH065301             | Eno1        | F2        | Psmd13                  | Ehd3                    |
| H2afy                       |           | Jup                  | Fam175b     | Fn1       | Psmd6                   | Emb                     |
| Hexb                        |           | Krt16                | Fth1        | Gstp1     | Psmd7                   | Fth1                    |
| Hspa1a                      |           | Mfge8                | Ggt1        | Hist2h2be | Ras                     | Ftl1                    |
| JH063331                    |           | Myo10                | Gstp1       | Hspa1a    | Rpa1                    | Ist1                    |
| Jup                         |           | Plxnb2               | H2afy       | Htra1     | Sdcbp                   | Lypla1                  |
| Krt17                       |           | Ptgfrn               | Hexb        | Il24      | Sept7                   | M6pr                    |
| Mrt04                       |           | Ptprf                | Idh1        | Itga2     | Smpdl3b                 | Mfi2                    |
| Park7                       |           | Pvr                  | Itga2       | Itga3     | Tacstd2                 | Psmd13                  |
| Polr1c                      |           | Sdcbp                | JH062394    | Itga6     | Thbs1                   | Psmd6                   |
| Ptgfrn                      |           | Sep9                 | Lypla1      | Itgb3     | Thop1                   | Psmd7                   |
| Rpa1                        |           | Tacstd2              | Nans        | Itgb4     | Tsnax                   | Reep6                   |
| Rpl7                        |           | Thbs1                | Pdcl3       |           | Tspan14                 | Slc44a1                 |
| Rplp2                       |           | Tinagl1              | Plscr3      |           | Tspan6                  | Tfrc                    |
| Smc1a                       |           | Tspan8               | Rplp2       |           | Tspan8                  | Tinagl1                 |
| Top2a                       |           |                      | Smc1a       |           | Tsta                    | Vps28                   |
| Tsnax                       |           |                      | Smpdl3b     |           |                         | Xpo2                    |
|                             |           |                      | Thbs1       |           |                         |                         |
|                             |           |                      | Thop1       |           |                         |                         |
|                             |           |                      | Top2a       |           |                         |                         |

Figure S1 **Functional activities of proteins distinctly recovered in ASML-wt, -cld7kd and -cld7mP cells and TEX.** NanoLC-ESI-MS/MS proteome analysis of ASML-wt, -cld7kd and -cld7mP cells and TEX. Distinctly recovered proteins were evaluated in (A) cells and (B) TEX for molecular functions according to Panther/Reactome analysis; in (C) cells and (D) TEX the individual proteins with distinct recovery in wt versus cld7kd and cld7mP cells/TEX are grouped according to the main functional activity; (E) flow-cytometry examples of selected proteins (mean±SD of 3 replicates), significant differences to wt cells/TEX in cld7kd and cld7mP cells/TEX: \*; (F) proteins enriched in ASML TEX compared to cld7kd cells were grouped for main functional activities according to (C,D).

The functional coordination of molecules overrepresented in wt cells confirmed a considerably contribution of trafficking and transporting molecules, followed by proteins engaged in transcription/translation, metabolism and signaling. Fewer differences in TEX prohibit a ranking, but in wt TEX compared to kd cells the ranking shifted towards a dominance of signaling molecules.

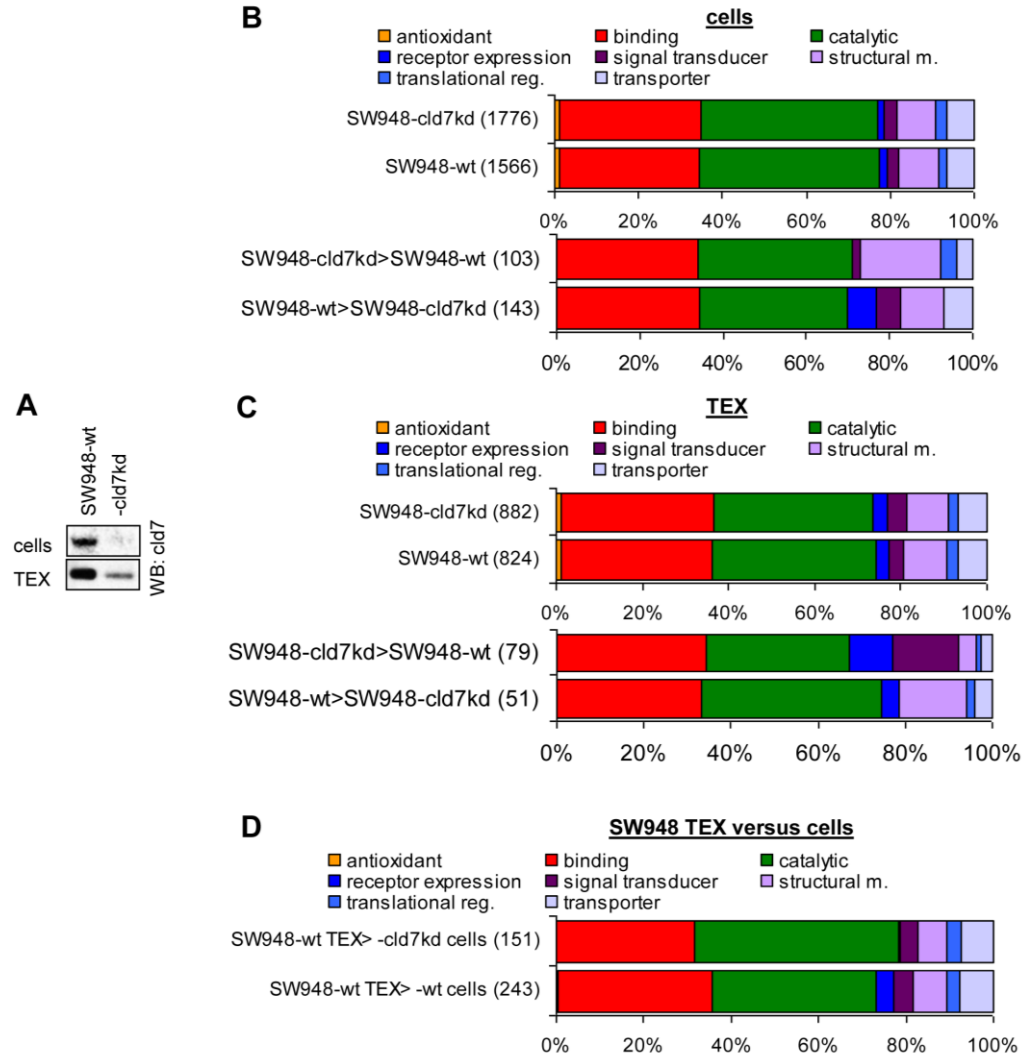

**E**

SW948-wt cells > -cld7kd cells

| transcription / translation | structure | adhesion / migration | metabolisms | signaling | proteolysis / apoptosis | trafficking / transport |
|-----------------------------|-----------|----------------------|-------------|-----------|-------------------------|-------------------------|
| AKAP9                       | FLNC      | CD166                | AKR1C1      | AKAP9     | ARMC10                  | AKAP9                   |
| CUL4A                       | JUP       | CDH1                 | AKR1C2      | AKR1C2    | DPEP1                   | ERLIN2                  |
| DDX17                       | LAMC1     | ITGA6                | CYB5R3      | ARMC10    | HM13                    | HTT                     |
| DDX5                        | SELENOF   | ITGB1                | DPEP1       | ARPC1B    | HTT                     | MVP                     |
| DNMT1                       |           | ITGB4                | EPHX1       | CD166     | IDE                     | MYO1B                   |
| ELAVL1                      |           | JUP                  | ERLIN2      | CDH1      |                         | MYO1C                   |
| FANCI                       |           | LAMA5                | ERO1A       | CIT       |                         | NDUFS2                  |
| GARS                        |           | LAMB1                | HACD3       | CTNNB1    |                         | NSF                     |
| HNRNPA3                     |           | LAMC1                | HK2         | DUSP3     |                         | OGDH                    |
| HNRNPC                      |           | MYOC1                | HSD17B11    | EGFR      |                         | REEP6                   |
| HNRNPH2                     |           | OLFM4                | IDE         | EPHB2     |                         | SLC35A4                 |
| HNRNPH3                     |           | PLXNB2               | LAMB1       | HACD3     |                         | SRSF1                   |
| HNRNPL                      |           | SELENOF              | LBR         | HM13      |                         | TM9SF4                  |
| HNRNPR                      |           | TM9SF4               | MDN1        | HSBP1     |                         | TPR                     |
| HNRNPUL2                    |           |                      | MTHFG1L     | ITGA6     |                         | USO1                    |
| ILF2                        |           |                      | MUC13       | ITGB1     |                         |                         |
| LSM4                        |           |                      | NAMPT       | ITGB4     |                         |                         |
| MDN1                        |           |                      | NUP210      |           |                         |                         |
| MRPL17                      |           |                      | OGDH        |           |                         |                         |
|                             |           |                      | PRKCSH      |           |                         |                         |
|                             |           |                      | PRMT1       |           |                         |                         |
|                             |           |                      | PUS7        |           |                         |                         |
|                             |           |                      | SEC63       |           |                         |                         |
|                             |           |                      | TOM22       |           |                         |                         |
|                             |           |                      | UBA6        |           |                         |                         |
|                             |           |                      | UGT1A6      |           |                         |                         |
|                             |           |                      | UGT1A7      |           |                         |                         |

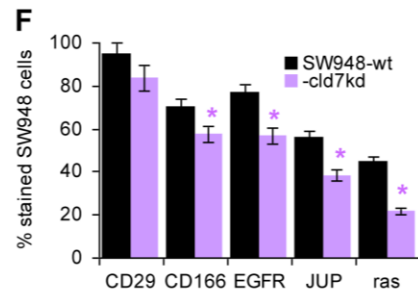

| G                                         |         | transcription / translation | structure | adhesion / migration | metabolisms | signaling | proteolysis / apoptosis | trafficking / transport |
|-------------------------------------------|---------|-----------------------------|-----------|----------------------|-------------|-----------|-------------------------|-------------------------|
| <b>SW948-wt TEX &gt; -cld7kd TEX</b>      |         |                             |           |                      |             |           |                         |                         |
| APEH                                      | GSN     | ACTR1B                      | ADA       | AK1C3                | IGF2R       | CAPN1     | AKR1C3                  |                         |
| COPS5                                     | TUBBA1A | CIB1                        | AKR1C3    | ANXA6                | NMT1        | CAPN5     | ANXA6                   |                         |
| H2AFY                                     | TUBB2A  | GC                          | AOC1      | AOC1                 | PSMB8       | CIB1      | COPS5                   |                         |
| NARS                                      |         | GSN                         | ATP5B     | ARPC1B               | PSME1       | GSN       | GC                      |                         |
| PPP2CA                                    |         | HSP4A                       | GLB1      | ATP6V1B2             | RAB7A       | OLFM4     | EPS8L3                  |                         |
| SYVC                                      |         | OLFM4                       | GPI       | CAPN5                | RAC1        | PARP4     | IGF2R                   |                         |
|                                           |         | RDX                         | GSS       | CIB1                 | RDX         | RNPEP     | RAB6B                   |                         |
|                                           |         | TSTA3                       | HSD17B4   | CSNK2B               | RHEB        |           | RAB7A                   |                         |
|                                           |         |                             | NAGLU     | EPS8L3               | RS27A       |           | TSTA3                   |                         |
|                                           |         |                             | NEU1      | GLG1                 | TUBBA1A     |           | TUBA1A                  |                         |
|                                           |         |                             | PAICS     | GSN                  | XPO1        |           | TUBB2A                  |                         |
|                                           |         |                             | PDXK      |                      |             |           | XPO1                    |                         |
|                                           |         |                             | PRPSAP1   |                      |             |           |                         |                         |
|                                           |         |                             | PYGL      |                      |             |           |                         |                         |
|                                           |         |                             | QSOX1     |                      |             |           |                         |                         |
| <b>SW948-cld7kd TEX &gt; SW948-wt TEX</b> |         |                             |           |                      |             |           |                         |                         |
| BMP4                                      | KRT14   | CD166                       | ATP5B     | ACP2                 | GNAS        | CAPN5     | AP2A2                   |                         |
| DYNLL1                                    | KRT6B   | CIB1                        | DIP2A     | AP2A2                | ITGB5       | CIB1      | AP2B1                   |                         |
| EIF1AX                                    | MINK1   | DLG1                        | G6PD      | AP2B1                | LY75        | DIP2A     | ATP1A3                  |                         |
| EPRS                                      | PKP3    | ITGB5                       | LIPH      | ATP1A3               | MAP4K4      | MINK1     | BET1L                   |                         |
| HRSP12                                    | POTEF   | PLXNB2                      | PRSS23    | BET1L                | MET         | PLAUR     | CASK                    |                         |
| PA2G4                                     | TLN1    | PTPRF                       | PTP4A1    | BMP4                 | MINK1       | PRSS23    | DYNLL1                  |                         |
| RPL35A                                    | TUBA1C  |                             | TMEM2     | CASK                 | MVB12A      | SERPINB6  | FKBP4                   |                         |
| SARS                                      |         |                             | UEVLD     | CD166                | MVB12B      | ST14      | LY75                    |                         |
| VPS36                                     |         |                             |           | CD276                | MYOF        |           | MVB12A                  |                         |
|                                           |         |                             |           | CD97                 | PLAUR       |           | MVB12B                  |                         |
|                                           |         |                             |           | CIB1                 | PSMC2       |           | PKP3                    |                         |
|                                           |         |                             |           | CTNND1               | PTPRF       |           | PSMC2                   |                         |
|                                           |         |                             |           | DLG1                 | RAB6C       |           | RAB6C                   |                         |
|                                           |         |                             |           | EPHA2                | RAP2A       |           | RAP2A                   |                         |
|                                           |         |                             |           | EPHB4                | RHOG        |           | TUBA1C                  |                         |
|                                           |         |                             |           | EPRS                 | RPA3        |           | UEVLD                   |                         |
|                                           |         |                             |           | FARP1                | TLN1        |           | VPS36                   |                         |
|                                           |         |                             |           | FARP2                | TNIK        |           |                         |                         |
|                                           |         |                             |           | FKBP4                | UBB         |           |                         |                         |
|                                           |         |                             |           | GNA11                |             |           |                         |                         |



# H

## SW948-wt TEX > SW948-wt & -cld7kd cells

| transcription / translation | structure | adhesion / migration | metabolisms | signaling | proteolysis / apoptosis | trafficking / transport |          |           |          |
|-----------------------------|-----------|----------------------|-------------|-----------|-------------------------|-------------------------|----------|-----------|----------|
| ACTL6A                      | CLDN2     | ACTRB1               | CASK        | A2M       | EPSBL3                  | PLSCR1                  | ADAM10   | ANXA6     | RAB35    |
| COPS4                       | CLDN3     | ADAM9                | CEMIP       | ACTL6A    | F2                      | PROM1                   | DPP4     | AP2A2     | RAB6B    |
| COPS5                       | DSG2      | BROX                 | CLU         | ADAM10    | FAT1                    | PSMA3                   | DSG2     | AP2M1     | RALA     |
| DLG1                        | FAT1      | CASK                 | DIP2B       | ADAM9     | FPRP                    | PSMB7                   | ITIH3    | APOB      | RAP1A    |
| H2AFY                       | JAM1      | CD63                 | GAA         | ANXA6     | FYN                     | PSMB8                   | MEP1A    | ARRDC1    | SCARB2   |
| HIST1H2BB                   | JUP       | CD9                  | GLB1        | AOC1      | GNAI3                   | PSMD6                   | NCSTN    | ATP1B1    | SDCBP    |
| PLSCR1                      | TUBA1A    | CIB1                 | GNB4        | AP2A2     | GNAS                    | RAB35                   | PDCD6IP  | ATP6AV0D1 | SDCBP2   |
| VPS25                       | TUBB1     | CLD2                 | ITIH2       | APOB      | GNB1                    | RAB6B                   | PLSC3    | ATP6AV1D  | SERPINE2 |
|                             |           | DNAJA1               | ITIH3       | ARRDC1    | GNB2                    | RAP1A                   | SERPINE2 | CASK      | SLC1A5   |
|                             |           | DSG2                 | LSR         | ATP6AP2   | GNB4                    | RAP2A                   | TMPRSS4  | CD55      | SLC29A1  |
|                             |           | EFNB1                | MAN1A1      | ATP6V1D   | GPA33                   | RAP2B                   |          | CD63      | SLC2A1   |
|                             |           | EFNB2                | MELFT       | C3        | GPRC5A                  | RAP2C                   |          | CHMP1B    | SLC44A1  |
|                             |           | EPCAM                | MFGE8       | CD55      | GPRC5C                  | RRAS                    |          | CHMP2A    | SLC44A2  |
|                             |           | FAT1                 | MUC13       | CD63      | HIST1H2BB               | RSU1                    |          | COPS4     | STOM     |
|                             |           | FPRP                 | PLOD1       | CD81      | HIST1H2BC               | S100A4                  |          | COPS5     | STX12    |
|                             |           | GOLGA7               | PLSCR3      | CD82      | HIST3H3                 | SCARB2                  |          | DLG1      | STX3     |
|                             |           | IGSF8                | PPP1R7      | CD9       | IGSF3                   | SDCBP                   |          | EHD1      | STX4     |
|                             |           | ITGA2                | PTP4A1      | CEMIP     | ITGA2                   | SDCBP2                  |          | EHD4      | STXBP2   |
|                             |           | ITGA3                | QDPR        | CIB1      | ITGA3                   | SLC1A5                  |          | F2        | TEM106B  |
|                             |           | ITGA6                | QPCT        | CLDN2     | ITGA6                   | SLC44A2                 |          | FA5       | TOM1L1   |
|                             |           | ITGB1                | QSOX1       | CLDN3     | ITGAV                   | SMPDL3B                 |          | FTL       | TSG101   |
|                             |           | ITGB5                | SERINC5     | CLU       | ITGB1                   | SRC                     |          | GNAS      | TSPAN8   |
|                             |           | JAM1                 | SLC44A1     | COPS5     | ITGB5                   | STX4                    |          | GOLGA7    | TTYH3    |
|                             |           | JUP                  | SMPDL38     | CSNK1A1   | JAM1                    | TGBI                    |          | IST1      | TUB1A1   |
|                             |           | LGALS3BP             | STXBP2      | CXADR     | JUP                     | THBS1                   |          | MVB12B    | TUBB1    |
|                             |           | MFGE8                | TGFBI       | DLG1      | LGALS3BP                | TNIK                    |          | PDCD6IP   | VPS25    |
|                             |           | MITD1                | THBS1       | DNAJA1    | LYN                     | TOM1L1                  |          | PSMA3     | VPS28    |
|                             |           | PARP4                | UXS1        | DPP4      | MINK1                   | TSPAN6                  |          | PSMB7     | VPS37B   |
|                             |           | PLEKHB2              |             | EFNB1     | MVB12B                  | TSPAN8                  |          | PSMB8     | VPS4B    |
|                             |           | PROM1                |             | EFNB2     | MVP                     | TUBA1A                  |          | QDPR      |          |
|                             |           | SERPINE2             |             | EHD4      | NCSTN                   | TUBB1                   |          |           |          |
|                             |           |                      |             | EPCAM     | PLPP2                   | YES1                    |          |           |          |
|                             |           |                      |             | EPHB2     |                         |                         |          |           |          |
|                             |           |                      |             | EPHB3     |                         |                         |          |           |          |

**I**

|                             |           |                      |             |           |                         |                         |
|-----------------------------|-----------|----------------------|-------------|-----------|-------------------------|-------------------------|
| transcription / translation | structure | adhesion / migration | metabolisms | signaling | proteolysis / apoptosis | trafficking / transport |
|-----------------------------|-----------|----------------------|-------------|-----------|-------------------------|-------------------------|

- SW948-wt TEX > SW948-wt cells**
- |                                                                                                                                                                            |                                                      |                                                                                      |                                                                                                            |                        |                                                                                                                               |
|----------------------------------------------------------------------------------------------------------------------------------------------------------------------------|------------------------------------------------------|--------------------------------------------------------------------------------------|------------------------------------------------------------------------------------------------------------|------------------------|-------------------------------------------------------------------------------------------------------------------------------|
| <p>DHX9<br/>EIF3E<br/>EIF3F<br/>EIF3L<br/>EIF3M<br/>EIF4E<br/>GARS<br/>HIST1H2AD<br/>RPL10A<br/>RPL12<br/>RPL18<br/>RPL6<br/>RPLP0<br/>RPL2<br/>RPS7<br/>RPSA<br/>WARS</p> | <p>ANXA2<br/>ANXA7<br/>FLOT2<br/>ITGB4<br/>SEPT9</p> | <p>DPEP1<br/>HBA1<br/>HIST1H2AD<br/>NANS<br/>NT5C3A<br/>PYGB<br/>PYGL<br/>RPL10A</p> | <p>DHX9<br/>FLOT1<br/>HISTH2AD<br/>IGTB4<br/>PSMB6<br/>RAB22A<br/>RAB5A<br/>RACK1<br/>RANGAP<br/>SEPT9</p> | <p>DPEP1<br/>PSMB6</p> | <p>ANXA2<br/>ATP5L<br/>COPE<br/>DNAJC13<br/>FLOT1<br/>FLOT2<br/>HBA1<br/>PSMB6<br/>RAB22a<br/>RAB5A<br/>SLC7A1<br/>SYNGR2</p> |
|----------------------------------------------------------------------------------------------------------------------------------------------------------------------------|------------------------------------------------------|--------------------------------------------------------------------------------------|------------------------------------------------------------------------------------------------------------|------------------------|-------------------------------------------------------------------------------------------------------------------------------|
- 
- SW948-wt TEX > SW948-cld7kd cells**
- |              |                                 |                                    |                                                                                                                                         |                                                                                                                                                              |
|--------------|---------------------------------|------------------------------------|-----------------------------------------------------------------------------------------------------------------------------------------|--------------------------------------------------------------------------------------------------------------------------------------------------------------|
| <p>PRMT1</p> | <p>CDH1<br/>OLFM4<br/>PTPRF</p> | <p>PYCR1<br/>SLC16A3<br/>TSTA3</p> | <p>CDH1<br/>CTNNB1<br/>IGF2R<br/>KRAS<br/>LAMTOR<br/>OLFM4<br/>PRMT1<br/>PSMD7<br/>RAB25<br/>RAP1B<br/>RHOB<br/>TSPAN14<br/>TSPAN15</p> | <p>ACTR1A<br/>FTH1<br/>IGF2R<br/>LAMTOR<br/>LINC7<br/>PSMD7<br/>RAB25<br/>RAP1B<br/>RDX<br/>REEP6<br/>RHOB<br/>SLC16A3<br/>TSPAN14<br/>TSPAN15<br/>TSTA3</p> |
|--------------|---------------------------------|------------------------------------|-----------------------------------------------------------------------------------------------------------------------------------------|--------------------------------------------------------------------------------------------------------------------------------------------------------------|

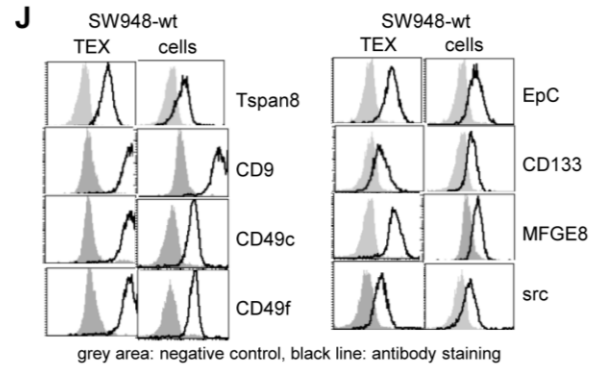

**Figure S2 The impact of cld7 on the protein profile of colorectal cancer cells and TEX and functional activities of proteins distinctly recovered in cells and TEX.** (A) Representative WB example of cld7 expression in SW948-wt and -cld7kd cells and TEX. (B-D) NanoLC-ESI-MS/MS proteome analysis of SW948-wt and -cld7kd cells and TEX was evaluated for differences in molecular functions; (B) Panther/Reactome analysis of SW948-wt and -cld7kd cells and of proteins higher in wt or cld7kd cells; (C) Panther/Reactome analysis of SW948-wt and -cld7kd TEX and of proteins higher in wt or cld7kd TEX; (D) Panther/Reactome analysis of SW948-wt TEX versus wt cells and cld7kd cells. (E-J) Distinctly recovered proteins were clustered according to transcription/translation, structure, adhesion/migration, metabolism, signaling, proteolysis/apoptosis and trafficking/transport; (E) Proteins enriched in SW948-wt compared to -cld7kd cells; (F) Flow-cytometry examples of selected proteins (mean±SD of 3 replicates), significant differences between wt and cld7kd cells: \*; (G) Proteins enriched or reduced in SW948-wt compared to -cld7kd TEX; (H) Proteins enriched in SW948-wt TEX compared to -wt and -cld7kd cells or (I) only in comparison to -wt or -cld7kd cells; (J) Flow-cytometry examples of selected proteins that expression differs significantly between TEX and cells, the overlay of antibody staining with the negative control (grey area) is shown. (E-J: full names of synonyms in Table S6).

The comparative analysis of SW948-wt versus -cld7kd cells and TEX confirms the engagement of cld7 in protein recruitment into TEX. In SW948-wt versus -cld7kd cells, differences in transcription/translation, signaling and metabolic proteins are most frequent, whereas in TEX differences in signaling and trafficking/transporting proteins become dominating. This ranking is also seen in the comparison between wt TEX versus wt and cld7kd cells, which is in line with the findings in ASML cells/TEX that cld7 strongly affects transporter and signaling molecule recruitment into TEX.

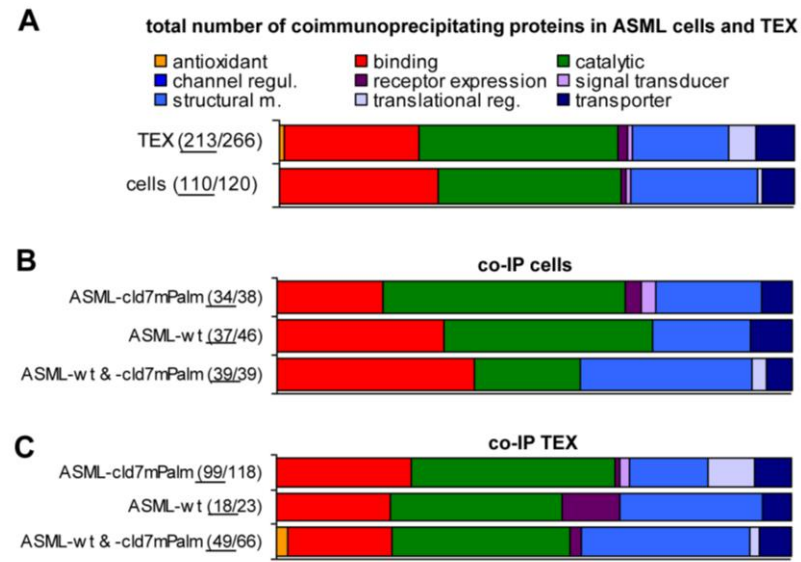

Figure S3 **Overview on molecular functions of proteins coimmunoprecipitating with claudin7 in ASML-wt and -cld7mP cells and TEX.** Lysates of ASML-wt and -cld7mP reconstituted -cld7kd cells and TEX were precipitated with anti-cld7. Precipitates were subjected to NanoLC-ESI-MS/MS proteome analysis. (A-C) The number of coimmunoprecipitating proteins and Panther/Reactome molecular function analysis of (A) cell and TEX precipitates, (B) wt versus cld7mP cells and (C) wt versus cld7mP TEX is shown.

The strong differences in the number of coimmunoprecipitating proteins in cells versus TEX confirm the impact of cld7 on protein recruitment during vesicle biogenesis. The difference in cld7- versus cld7mP-coimmunoprecipitating molecules in TEX suggests a broader range of proteins being recruited towards ILV by non-palmitoylated than palmitoylated cld7. The interpretation was supported by NanoLC-ESI-MS/MS proteome analysis of anti-EpCAM precipitates (data not shown).

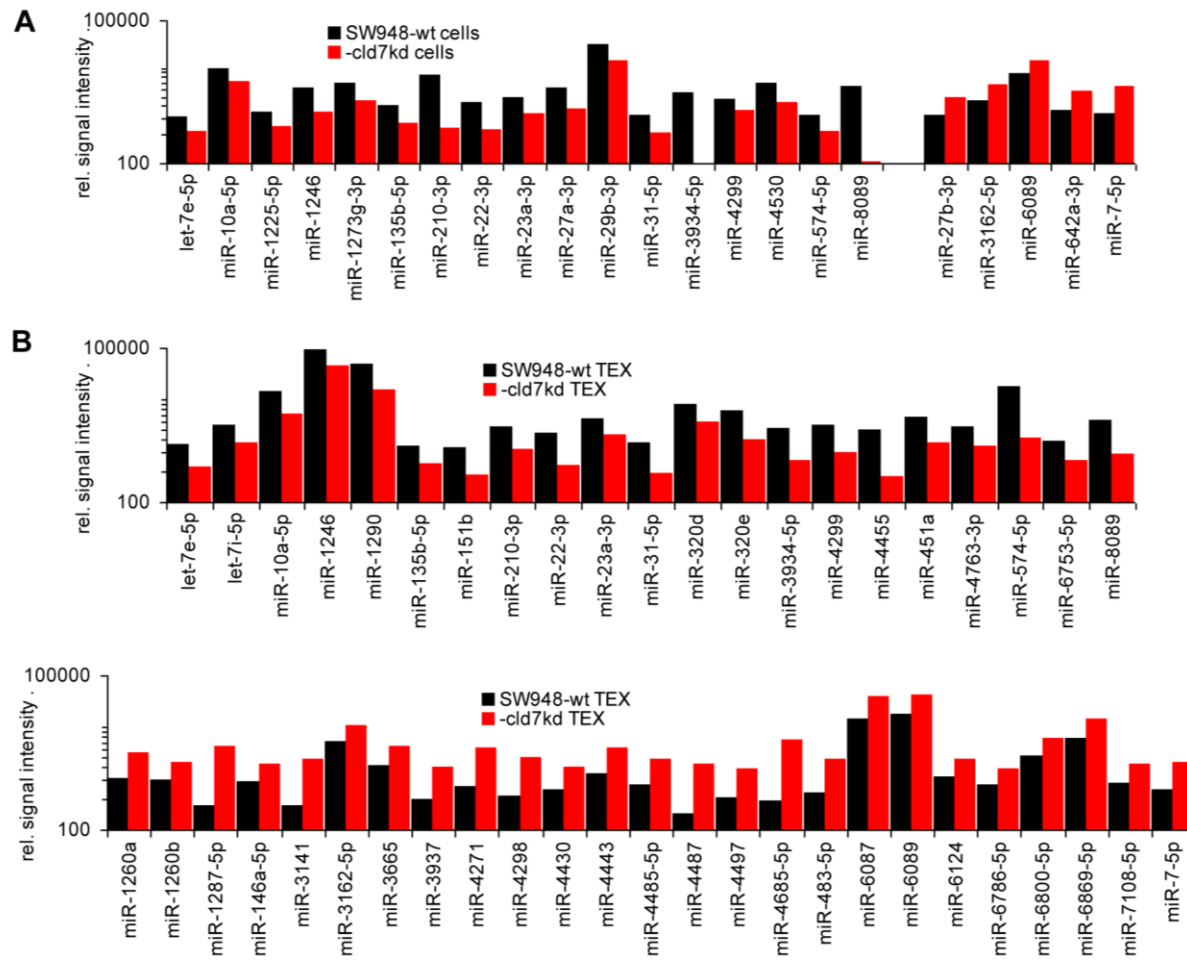

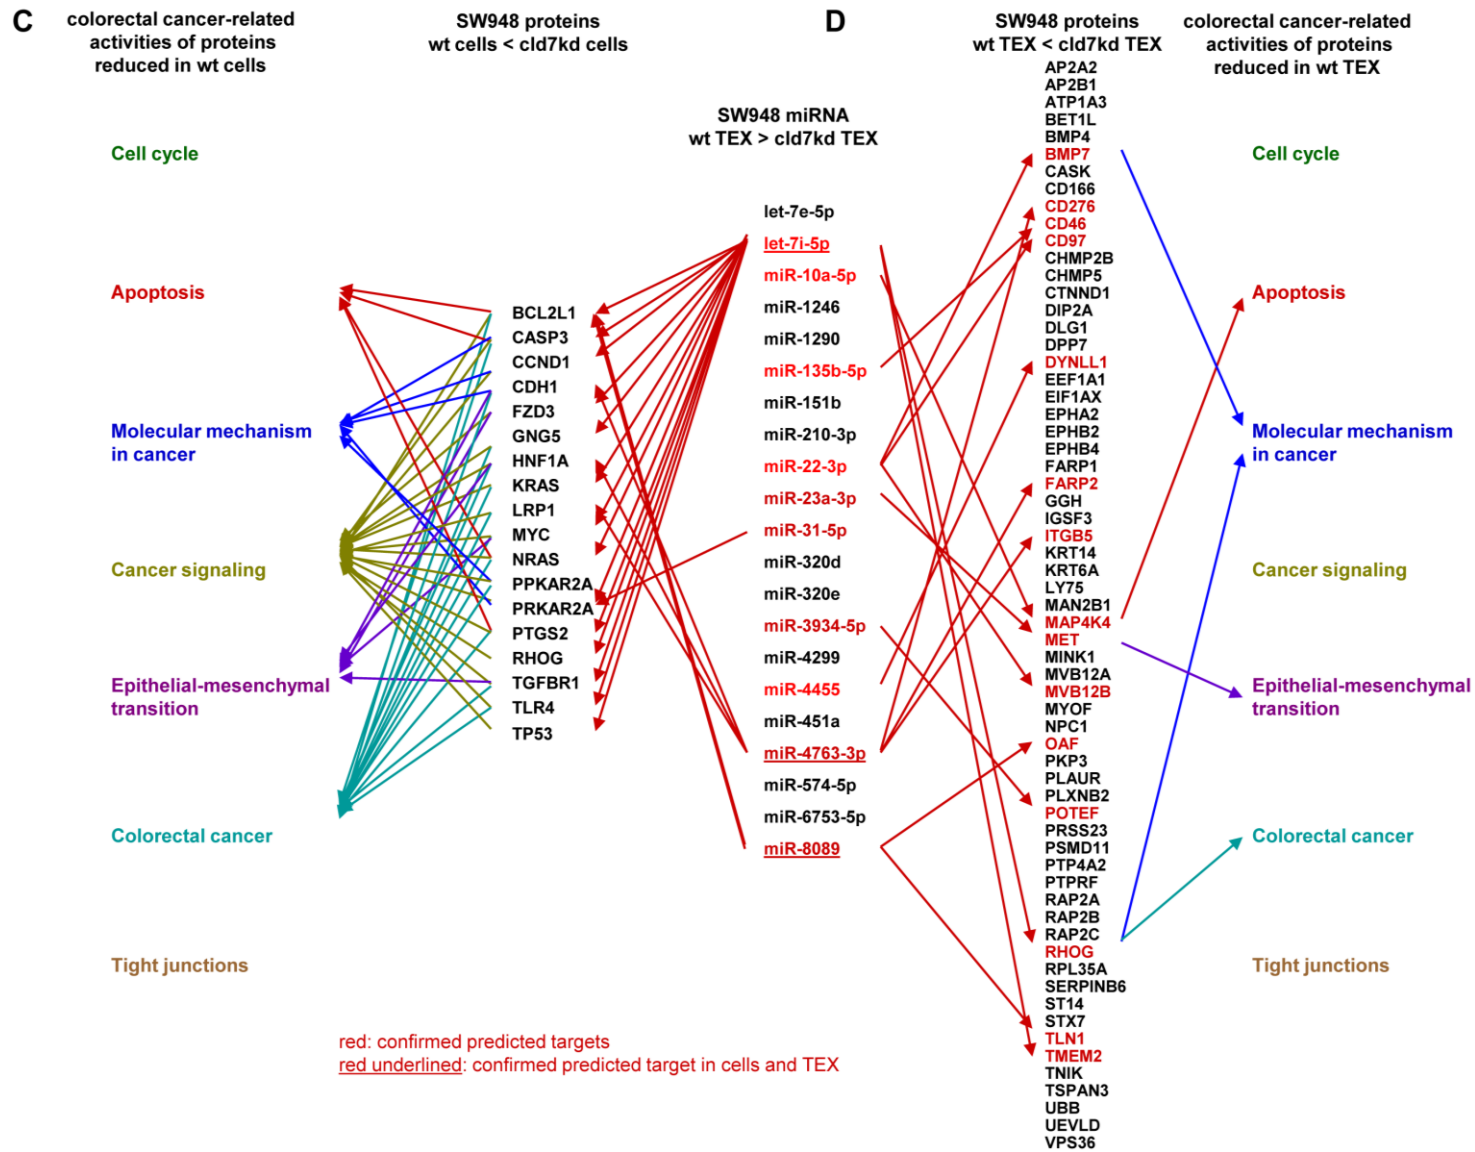

Figure S4 **Cld7-dependent recruitment of miRNA into colorectal cancer TEX**. MiRNA recovery in SW948-wt and -cld7kd cells and TEX was evaluated by STAR aligner version 2.5.2a. Distinct recovery (>2-fold difference in signal strength) of (A) miRNA in wt versus cld7kd cells and (B) miRNA in wt versus cld7kd TEX; (C,D) miRNA higher in wt than cld7kd TEX were evaluated for predicted targets engaged in colorectal cancer related activities (red). IPA analysis was used to assign recovery of predicted target that expression inversely correlated with the miRNA recovery. For those mRNA the engagement in colorectal cancer activity is indicated; (C) predicted targets with lower expression in wt than cld7kd cells and (D) in wt than cld7kd TEX and their engagement in CoCa-related activities are shown. (C,D: full names of synonyms in Table S6). Several miRNA are distinctly recovered in wt versus cld7kd TEX, confirming a suggested engagement of cld7 in MVB transport to the plasma membrane. In the cell, several predicted targets of miRNA higher in wt than cld7kd TEX are accordingly repressed, all of the predicted targets being engaged in cancer-related activities, mostly in signaling in cancer. On the other hand, there is a poor correlation between miRNA and predicted target recovery in TEX, the vast majority of affected proteins being not a target of the high level recovered miRNA and only 4 are engaged in cancer-related activities. The finding suggests that miRNA recruited via cld7 into TEX does not shape the TEX protein profile.

## Supplementary methods

**Exosome preparation:** SW948 cells were enriched for CIC by 3 rounds of spheroid growth. ASML-wt TEX can be considered as CIC-TEX, the ASML PaCa being monoclonal, not growing locally and displaying all features of a CIC [35]. CIC-enriched cells were seeded in 250ml flasks in RPMI1640 supplemented with 10% Exo-depleted FCS. After adhesion and repeated washing with PBS, the subconfluent cultures were maintained for 48h in 15ml FCS-free RPMI1640 for TEX collection. After 24h recovery (RPMI with 10% Exo-depleted FCS), TEX were collected for an additional 48h in FCS-free medium. Cell viability was not affected by the TEX collection process, being >98% before and after collection. CIC-enriched cells were discarded after TEX collection. The CIC supernatants were cleared (2x10min, 500g, 1x20min, 2000g, 1x30min, 10000g, 4°C), filtered (0.22µm) and centrifuged (Beckman Coulter ultracentrifuge, Type 45 Ti rotor, 50 ml, 120min, 100000g, 4°C). The pellet was resuspended and washed (PBS, 120min, 100000g, 4°C). The same procedure was used to deplete FCS from exosomes, collecting the supernatants. After washing, the pellet was resuspended in 0.8ml and mixed with 0.8ml 80% sucrose and layered at the bottom of 4ml ultracentrifugation tubes. The 40% sucrose was overlaid with 1.6ml 30% and 0.8ml 5% sucrose gradient and centrifuged (Beckman Coulter ultracentrifuge, SW41Ti rotor, 4ml tubes, 16h, 100000g, 4°C), collecting 12 fraction of 320µl, TEX being enriched in light density fractions 1-4 (d: 1.15-1.56g/ml). TEX preparations were either stored at -80°C or were used immediately for mass spectrometry and miRNA sequencing.

**Mass spectrometry and database searches:** Cell and TEX lysates and dissolved immunoprecipitates were separated by 1D SDS gel electrophoresis. After staining with Coomassie lanes were cut into ten slices. Proteins in the individual gel slices were reduced with DTT, alkylated with iodoacetamide and in-gel digested with trypsin (Promega, Mannheim, Germany) overnight. Tryptic peptides were extracted from the gel pieces, evaporated to dryness in a speed-vac concentrator and dissolved in 5µl 0.1% TFA/2.5% hexafluoro-2-propanol prior to analysis by nanoLC-ESI-MS/MS. Peptide mixtures were separated using a nanoAcquity UPLC system. For trapping we used a C18 pre-column (180µm × 20mm) with a particle size of 5µm (Waters GmbH, Eschborn, Germany). Liquid chromatography separation was performed on a BEH130 C18 main-column (100µm × 100mm) with a particle size of 1.7µm (Waters GmbH, Eschborn, Germany). Peptide mixtures were loaded on the trap column at a flow rate of 5µl/min and were eluted with a gradient at a flow rate of 400nl/min. The nanoUPLC system was coupled online to an LTQ-Orbitrap XL mass spectrometer (Thermo Scientific, Bremen, Germany). The mass spectrometer was operated in data-dependent mode to automatically measure MS1 and MS2. Data were acquired by scan cycles of one FTMS scan with a resolution of 60.000 at  $m/z$  400 and a range from 300 to 2000  $m/z$  in parallel with six MS/MS scans in the linear ion trap of the most abundant precursor ions. The mgf-files generated by Xcalibur software (Thermo Scientific, Bremen, Germany) were used for database searches with the MASCOT search engine (version 2.4.1, Matrix Science, London, UK) against the SwissProt database (SwissProt 2015\_08, 549008 sequences; 195692017 residues) with taxonomy human (20278 sequences). Peptide mass tolerance for database searches was set to 7 ppm and fragment mass tolerance to 0.4 Da. Carbamidomethylation of C was set as fixed modification. Variable modifications included oxidation of M and deamidation of NQ. One missed cleavage site in case of incomplete trypsin hydrolysis was allowed. Furthermore, proteins were considered as identified if more than one unique peptide had an individual ion score exceeding the MASCOT identity threshold.

**Real-time PCR (qRT-PCR):** Real-time polymerase chain reaction (PCR) was performed using a standard TaqMan PCR kit protocol on an Applied Biosystems 7900HT Sequence Detection System (Applied Biosystems). The 10µl PCR included 0.67µl of reverse transcriptase product, 1x TaqMan Universal PCR Master Mix (Applied Biosystems), 0.2µM TaqMan probe, 1.5µM forward primer, and 0.7µM reverse primer. The reactions were incubated in a 384-well plate at 95°C for 10min, followed by 40cycles of 95°C for 15sec and 60°C for 1min. All reactions were run in triplicate. Small nuclear snRNA U6 was used as internal control for miRNA. The threshold cycle ( $C_T$ ) is defined as the fractional cycle number at which the fluorescence passes the fixed threshold. TaqMan  $C_T$  values were converted into absolute copy numbers using a standard curve from synthetic lin-4 miRNA. Statistical analysis was done by the  $\Delta C_T$  method [ $\Delta C_T = C_T$  test gene -  $C_T$  endogenous control;  $\Delta\Delta C_T = \Delta C_T$  sample -  $\Delta C_T$  calibrator. For RQ (relative quantification/fold change) wt cells or TEX were used as reference.

**Data accessibility:** Proteome analysis are available at Functional Proteome Analysis, DKFZ, Heidelberg, Im Neuenheimer Feld 280, D69120 Heidelberg, Germany, File numbers SH2726 and SH2769, Dr. Martina Schnölzer, e-mail: m.schnoelzer@dkfz-heidelberg.de. MicroRNA microarray data are deposited at GEO (human miRNA: <http://www.ncbi.nlm.nih.gov/geo/query/acc.cgi?acc=GSE119031>, GSE119032, -GSE 11903, rat miRNA: <http://www.ncbi.nlm.nih.gov/geo/query/acc.cgi?acc=GSE120185>).
